# Supplementary material for: Reexamination of Rhopalosiphum (Hemiptera: Aphididae) using linear discriminant analysis to determine the validity of synonymized species, with some new synonymies and distribution data
Source: Biodivers Data J. 2020 Jan 27;8:e49102. doi: 10.3897/BDJ.8.e49102 (PMC6997245; doi:10.3897/BDJ.8.e49102)
Supplement: Supplementary material 2 — Rhopalosiphum measurements, apterae, synonymized species [file bdj-08-e49102-s002.xlsx]

## Sheet: Sheet1
Specimen	species	host order	host family	host	Deposited at	1	2	3	4	5	6	7	8	9	10	11	12	13	14	15	16	17	18	19	20	21	22	23	24	25	26	27
						ant-1	ant-2	ant-3	ant-4	ant-5	ant-6	ant-pt	head	rost-l	rost-w	fem-l	tib-l	dist-l	siph-l	caud-l	abdset-l	bl	siph-w	rost-l:rost-w	rost-l:dist-l	ant-pt:ant-6	siph-l:siph-w	siph-l:caud-l	siph-l:ant-3	rost-l:caud-l	bl-head	ant3-4 fused
0143-1	chusqueae	Poales	Poaceae	Chusquea	CZULE	93.65	94.9	334.7	194.7	200.3	109.2	460.3	506.3	132.7	79.5	725.2	1262.5	101	419.6	187.1	117.6	2345.3	94.8	1.66918	1.31386	4.2152	4.42616	2.24265	1.25366	0.709246	4.63223	0
0144-1	chusqueae	Poales	Poaceae	Chusquea	CZULE	NA	94.5	464	255.1	253.3	128.5	493	NA	139	95.3	800.7	1426.5	132	441.7	209.1	118.6	2639	104.6	1.45855	1.05303	3.83658	4.22275	2.11239	0.95194	0.664754	NA	0
0001-4	enigmae	Poales	Typhaceae	Typha	USNM	88.1	62.1	199.6	123.5	112.9	67.1	NA	438.3	NA	NA	NA	NA	NA	288.7	120.7	53.8	1839.2	58.3	NA	NA	NA	4.95197	2.39188	1.44639	NA	4.19621	0
0001-6	enigmae	Poales	Typhaceae	Typha	USNM	73.7	70.2	203.4	102.8	116.2	68.4	NA	398.3	115.2	55.1	496.9	781.7	93.7	304.5	128.7	52.3	1813.3	99.8	2.09074	1.22946	NA	3.0511	2.36597	1.49705	0.895105	4.5526	0
0001-7	enigmae	Poales	Typhaceae	Typha	USNM	80	65.8	300.7	107.8	108.4	79.8	385.1	426.5	120.1	62.6	388.54	558.1	104	297.7	126.4	50	1797.5	104.1	1.91853	1.15481	4.82581	2.85975	2.35522	0.990023	0.950158	4.21454	0
0001-8	enigmae	Poales	Typhaceae	Typha	USNM	75.6	65.8	304.8	150.3	146.7	77.5	306.7	427.3	118.5	63.1	NA	NA	NA	254.4	100.8	41	2118.3	78.3	1.87797	NA	3.95742	3.24904	2.52381	0.834646	1.1756	4.95741	0
0002-1	enigmae	Poales	Typhaceae	Typha	USNM	NA	65.1	206.8	135	129.6	75.7	417.9	420	118.9	53.7	467.5	733.5	95.8	268.2	NA	NA	1840.2	78.2	2.21415	1.24113	5.52048	3.42967	NA	1.29691	NA	4.38143	0
0002-2	enigmae	Poales	Typhaceae	Typha	USNM	70.8	59.2	254.2	166.8	167.1	75.2	521.7	473.4	135.1	64.5	589.4	953.9	113.3	321.5	133.1	NA	NA	89.1	2.09457	1.19241	6.9375	3.60831	2.41548	1.26475	1.01503	NA	0
0003-1	enigmae	Poales	Typhaceae	Typha	USNM	83.1	65.2	253.4	131.5	120.4	75.9	353.1	458.9	123.7	56.8	572.6	829.6	114.1	322.7	113.3	37.3	2130.7	86.9	2.17782	1.08414	4.65217	3.71346	2.84819	1.27348	1.09179	4.64306	0
0003-2	enigmae	Poales	Typhaceae	Typha	USNM	75.3	65.5	209.8	107.3	97.2	78	379.9	452.7	118.8	62.7	533.5	767.1	105.9	287.9	126.1	40.1	1852.9	95.3	1.89474	1.12181	4.87051	3.02099	2.28311	1.37226	0.942109	4.093	0
0004-4	enigmae				USNM	44	75.1	295	185.8	185.8	90.1	432.7	481.2	122.9	59.2	599.9	1008.9	138.6	418.6	133.6	NA	2104.9	99.6	2.07601	0.886724	4.80244	4.20281	3.13323	1.41898	0.91991	4.37427	0
0004-5	enigmae				USNM	87.2	80.9	299.4	201.7	189.6	90.4	456.4	478.1	NA	NA	NA	1023	120.6	391.8	NA	NA	1965.5	101.4	NA	NA	5.04867	3.86391	NA	1.30862	NA	4.11106	0
0007-4	enigmae	Poales	Typhaceae	Typha	USNM	98	76.8	275	175.7	170	85.4	NA	507.3	NA	NA	652.5	1093.5	106	360.1	136.8	39.5	2321.3	116.2	NA	NA	NA	3.09897	2.63231	1.30945	NA	4.57579	0
0007-5	enigmae	Poales	Typhaceae	Typha	USNM	99.4	69	279.3	188.7	165.8	87.2	496.8	490.6	NA	NA	NA	1129	113.2	384	131.4	NA	2186.6	97.7	NA	NA	5.69725	3.9304	2.92237	1.37487	NA	4.45699	0
0007-6	enigmae	Poales	Typhaceae	Typha	USNM	83.1	NA	NA	NA	NA	NA	NA	501.9	136.4	62.3	635.2	1062.7	115.4	348.4	NA	NA	2171.8	115.4	2.18941	1.18198	NA	3.01906	NA	NA	NA	4.32716	NA
0008-1	enigmae	Poales	Typhaceae	Typha	USNM	102.9	76.5	249.5	141.8	149.8	80.2	468.2	471.5	140.6	68.5	616.1	1016.4	126.7	350.5	97.5	59.4	1921.2	82.9	2.05255	1.10971	5.83791	4.22799	3.59487	1.40481	1.44205	4.07466	0
0008-2	enigmae	Poales	Typhaceae	Typha	USNM	104.8	75.6	307	207	190	103	463.6	522.1	131	69.7	689.5	1144.8	131.6	398.5	NA	NA	2309.3	114.3	1.87948	0.995441	4.50097	3.48644	NA	1.29805	NA	4.4231	0
0009-1	enigmae	Poales	Typhaceae	Typha	USNM	96.1	72.8	263.7	168.6	164.1	82.7	405.5	474.6	131.4	64.3	615.6	1041.9	123.4	344.6	120.4	NA	2319.5	98.3	2.04355	1.06483	4.90326	3.5056	2.86213	1.30679	1.09136	4.88727	0
0009-2	enigmae	Poales	Typhaceae	Typha	USNM	88.8	73.6	281.5	163.4	158.7	80.6	454.4	462	135.1	67.9	596.2	979.2	123.2	345.5	NA	NA	2331.1	92.2	1.98969	1.09659	5.63772	3.74729	NA	1.22735	NA	5.04567	0
0010-1	enigmae	Poales	Typhaceae	Typha	USNM	92.1	71.3	288.5	154.8	183.4	89.7	473.9	451.2	136.5	62.1	615.4	1008.5	123.8	369.5	135.3	NA	NA	84.2	2.19807	1.10258	5.28317	4.38836	2.73097	1.28076	1.00887	NA	0
0010-3	enigmae	Poales	Typhaceae	Typha	USNM	98.8	84	363.7	184.8	214.8	94	483.8	494	115.6	65.3	674.8	1105.2	114	371.7	145.7	66.4	2340.7	99.3	1.77029	1.01404	5.14681	3.7432	2.55113	1.022	0.793411	4.73826	0
0011-1	enigmae	Poales	Typhaceae	Typha	USNM	94.1	80.3	308.5	205.7	207.6	108.1	445.8	508.1	135.7	73.7	702.3	1136.2	132.5	408.3	NA	50.2	2588	96.3	1.84125	1.02415	4.12396	4.23988	NA	1.3235	NA	5.09349	0
0011-3	enigmae	Poales	Typhaceae	Typha	USNM	95.6	80.8	294.2	211.3	185.3	95.9	420.1	468.8	NA	NA	628.4	1081.4	127.2	383.3	NA	47.7	2313	93.5	NA	NA	4.3806	4.09947	NA	1.30286	NA	4.93387	0
0012-1	enigmae	Poales	Typhaceae	Typha	USNM	81.6	69.4	242.2	135.4	140.5	78.5	489	447.2	119.1	79.8	514.3	858.2	98.1	341.5	122.7	78.8	2111	102.7	1.49248	1.21407	6.2293	3.32522	2.78321	1.40999	0.97066	4.72048	0
0012-2	enigmae	Poales	Typhaceae	Typha	USNM	90.7	78.1	250.9	145.4	152.9	91.2	482.9	489.3	131	63.3	587.3	950.4	100.8	353.3	133.1	69.7	2037.9	107.8	2.06951	1.2996	5.29496	3.27737	2.6544	1.40813	0.984222	4.16493	0
0013-1	enigmae	Poales	Typhaceae	Typha	USNM	80.5	69.4	204.4	101.3	120.4	76.1	424.9	431.3	128.8	62.7	511.9	771.2	102.6	294.7	110.8	NA	1685	72.7	2.05423	1.25536	5.58344	4.05365	2.65975	1.44178	1.16245	3.90679	0
0013-2	enigmae	Poales	Typhaceae	Typha	USNM	79.8	73.9	218.2	107.1	126.6	84.4	427.2	445.8	125.9	65.3	565.1	847	104.9	304	117.4	NA	NA	74.7	1.92802	1.20019	5.06161	4.06961	2.58944	1.39322	1.0724	NA	0
0013-3	enigmae	Poales	Typhaceae	Typha	USNM	93.3	79.3	276.7	129.7	151	92	NA	485.3	125.9	72.9	562.3	NA	NA	328.6	113.1	NA	1894.6	100.8	1.72702	NA	NA	3.25992	2.90539	1.18757	1.11317	3.90398	0
0015-1	enigmae	Poales	Typhaceae	Typha	USNM	77.5	70.3	NA	NA	NA	NA	NA	475.2	125.2	65.7	550.3	855	96.9	310.1	137.4	65	1956.1	85.5	1.90563	1.29205	NA	3.6269	2.25691	NA	0.911208	4.11637	NA
0015-3	enigmae	Poales	Typhaceae	Typha	USNM	81.4	73.1	237.5	149.8	139.2	83.3	437.9	471	124.7	64.1	581.6	946	105.6	321.4	NA	NA	1982	98.1	1.9454	1.18087	5.2569	3.27625	NA	1.35326	NA	4.20807	0
0016-1	enigmae	Poales	Typhaceae	Typha	USNM	92.4	65.8	240.1	122.7	133.4	79.9	385.2	477.4	126.4	63.8	594	917.8	109.6	318.2	134.9	NA	2157.7	105.3	1.98119	1.15328	4.82103	3.02184	2.35878	1.32528	0.93699	4.51969	0
0016-2	enigmae	Poales	Typhaceae	Typha	USNM	85.9	66.8	260.9	136.7	149.4	81.3	418	493.3	130.1	68.5	592.1	953.9	117.5	370	NA	NA	NA	99.6	1.89927	1.10723	5.14145	3.71486	NA	1.41817	NA	NA	0
0016-3	enigmae	Poales	Typhaceae	Typha	USNM	88.6	73.5	233.3	127.4	129.8	82	NA	486.9	129.4	64.7	578.2	953.2	110.3	275.3	140	NA	2355.8	90.9	2	1.17316	NA	3.0286	1.96643	1.18003	0.924286	4.83837	0
0023-1	enigmae	Poales	Typhaceae	Typha	USNM	85.9	79.3	245.6	154.8	145.8	84	533.6	533.1	128.2	89.6	595.2	911.7	105.2	329.4	136	79.3	2369.8	NA	1.4308	1.21863	6.35238	NA	2.42206	1.34121	0.942647	4.44532	0
0030-1	enigmae	Poales	Typhaceae	Typha	AJ	79.4	55.8	204.2	116.8	112.9	75.5	405	390.9	112.3	63.3	428.5	684.3	96.1	266.4	NA	57.9	1630.9	93.5	1.77409	1.16857	5.36424	2.8492	NA	1.3046	NA	4.17217	0
0032-1	enigmae	Poales	Typhaceae	Typha	AJ	88.7	58.1	199.9	116.2	114.5	65.9	389.4	431.5	123	57.6	502.9	797.1	103.6	272.1	108.6	52.9	2010.8	93	2.13542	1.18726	5.90895	2.92581	2.50552	1.36118	1.1326	4.66002	0
0033-1	enigmae	Poales	Typhaceae	Typha	AJ	86.3	67.1	274.3	153.5	156.7	88.9	408.2	448.6	127.9	65	581.2	980.2	108.2	325.6	132.7	NA	1996.1	81	1.96769	1.18207	4.59168	4.01975	2.45365	1.18702	0.963828	4.44962	0
0033-2	enigmae	Poales	Typhaceae	Typha	AJ	83.9	63.3	297.1	129.7	160.7	88.1	447.3	453.9	125.7	67.6	574.1	912.9	103.6	312.6	NA	NA	1919.3	94.9	1.85947	1.21332	5.07719	3.29399	NA	1.05217	NA	4.22846	0
0034-1	enigmae	Poales	Typhaceae	Typha	AJ	76.4	76.1	239	141.6	143	79	399.4	424.7	123.2	63.4	505.7	823.1	109.6	265.5	108.5	63.3	1896.7	70.4	1.94322	1.12409	5.0557	3.77131	2.447	1.11088	1.13548	4.46598	0
0034-2	enigmae	Poales	Typhaceae	Typha	AJ	88.6	66.4	240.8	137.8	151.1	64.3	402.5	459	127.8	64.1	563.7	872.1	107.1	300.3	134.2	60.7	2203.2	85.1	1.99376	1.19328	6.25972	3.52879	2.2377	1.24709	0.95231	4.8	0
0035-1	enigmae	Poales	Typhaceae	Typha	AJ	90.3	74.4	294.6	137.3	167.5	82.4	443.5	479.9	129.6	67.5	644.7	989.8	106.7	355.3	131.7	72	2243.9	87.7	1.92	1.21462	5.38228	4.05131	2.6978	1.20604	0.984055	4.67577	0
0035-2	enigmae	Poales	Typhaceae	Typha	AJ	85.7	67.2	240.4	130.9	128.3	69.8	391.8	456.5	125.2	61.8	569.7	861.2	106.7	310.9	131.8	NA	2004.8	82	2.02589	1.17338	5.61318	3.79146	2.35888	1.29326	0.949924	4.39168	0
0036-1	enigmae	Poales	Typhaceae	Typha	AJ	94.3	64.2	258.8	156	141	84.1	NA	463.8	130.8	66.1	594	935.3	107.2	300	130.8	63.3	2151.3	108.3	1.97882	1.22015	NA	2.77008	2.29358	1.1592	1	4.63842	0
0036-2	enigmae	Poales	Typhaceae	Typha	AJ	83.8	74.9	236.2	120.8	136.4	70.4	423.9	444.6	120.9	61.7	581.9	880.2	110.2	304.2	128	NA	2114.4	88.3	1.95948	1.0971	6.02131	3.44507	2.37656	1.28789	0.944531	4.75574	0
0321-1	enigmae	Poales	Typhaceae	Typha	USNM	68.3	54.3	235.7	120	111.5	86.8	472	420.9	119.3	63.2	510.9	819.7	98.3	286.8	100	59.8	1598.2	95.3	1.88766	1.21363	5.43779	3.00944	2.868	1.2168	1.193	3.7971	0
0502-6	enigmae	Poales	Typhaceae	Typha	USNM	NA	75.7	196.5	127	129.5	81.1	321.8	466.4	123.6	61.6	510.9	823.9	100.1	295.4	142.3	47.2	NA	87.5	2.00649	1.23477	3.96794	3.376	2.0759	1.50331	0.868587	NA	0
0504-1	enigmae	Poales	Typhaceae	Typha	USNM	80.1	73.2	267.1	182.2	155.5	81.7	496.9	465.3	129.5	56.7	601.1	976	112.2	361.2	121	57.8	1988.5	98	2.28395	1.15419	6.08201	3.68571	2.98512	1.3523	1.07025	4.27359	0
0504-2	enigmae	Poales	Typhaceae	Typha	USNM	85	69.7	290.3	163.2	147	78.8	470.1	477.4	130.1	60.6	589.3	978.3	111.9	370.4	120.8	68.6	2060.7	96	2.14686	1.16265	5.96574	3.85833	3.06623	1.27592	1.07699	4.31651	0
0504-3	enigmae	Poales	Typhaceae	Typha	USNM	81.5	65.8	247.3	130.2	128.6	79.8	478.6	445.3	129.8	NA	525.6	905.4	104.7	335.8	119.1	72.8	1903.2	68.1	NA	1.23973	5.99749	4.93098	2.81948	1.35786	1.08984	4.27397	0
0505-6	enigmae	Poales	Typhaceae	Typha	USNM	90.2	62	338.1	181.7	160.6	72.6	386.2	487.8	137.2	67.7	670.4	1098.9	123.5	382.3	142.9	69.3	2114.4	114.6	2.02659	1.11093	5.31956	3.33595	2.6753	1.13073	0.960112	4.33456	0
0506-10	enigmae	Poales	Typhaceae	Typha	USNM	83.9	70.7	217	128.5	NA	NA	NA	447.1	105.6	NA	494	824.9	118.3	281.3	NA	NA	1816	81.1	NA	0.892646	NA	3.46856	NA	1.29631	NA	4.06173	0
0506-11	enigmae	Poales	Typhaceae	Typha	USNM	77.7	60.7	225.2	106.3	121.8	79.9	420.9	448.8	125.9	56.1	510.8	797.9	113.4	304	NA	83.8	1916.2	69.2	2.24421	1.11023	5.26783	4.39306	NA	1.34991	NA	4.26961	0
0506-13	enigmae	Poales	Typhaceae	Typha	USNM	65.3	69.6	222	115.4	114	74.5	393.8	440.5	119.4	57.1	495.8	825.7	108	295.4	NA	59.5	1939.7	59.4	2.09107	1.10556	5.28591	4.97306	NA	1.33063	NA	4.40341	0
0506-5	enigmae	Poales	Typhaceae	Typha	USNM	71.9	50.6	200	101.9	109	74.8	404.3	414.8	112.3	54.3	435.7	NA	NA	302.8	NA	56.9	1520.5	80.7	2.06814	NA	5.40508	3.75217	NA	1.514	NA	3.66562	0
0506-7	enigmae	Poales	Typhaceae	Typha	USNM	70.2	55.5	158.3	95.5	104.2	69.8	395	402.9	NA	NA	427.3	730.9	99.5	264	NA	68.6	1427	86.1	NA	NA	5.65903	3.0662	NA	1.66772	NA	3.54182	0
0506-8	enigmae	Poales	Typhaceae	Typha	USNM	72.2	52.5	176.2	82.1	91.4	66.6	417.4	409.7	109.4	52	366.1	605.4	85.3	255.2	63.7	NA	1386	69.6	2.10385	1.28253	6.26727	3.66667	4.00628	1.44835	1.71743	3.38296	0
0507-13	enigmae	Poales	Typhaceae	Typha	USNM	83.9	70.2	269.4	128.1	112.1	76.2	395.7	463.3	126.9	59.4	564.3	901	112.3	328.4	104.6	70	2019.1	109.8	2.13636	1.13001	5.19291	2.99089	3.13958	1.21901	1.21319	4.35808	0
0509-1	enigmae	Poales	Typhaceae	Typha	USNM	66.4	53.8	277.3	149.9	148.5	76.9	NA	445.9	117.2	79.3	565.8	884.2	107	321.6	99	NA	1879.6	108.8	1.47793	1.09533	NA	2.95588	3.24848	1.15975	1.18384	4.21529	0
0509-2	enigmae	Poales	Typhaceae	Typha	USNM	91	68.7	273.1	141.1	158.1	96.6	400.1	412	130.8	58.7	616.8	934	NA	304	124.8	NA	1945.1	98.1	2.22828	NA	4.14182	3.09888	2.4359	1.11315	1.04808	4.72112	0
0509-3	enigmae	Poales	Typhaceae	Typha	USNM	79.6	70.3	239.3	135.4	146.3	84.7	396.1	467.6	128.5	64.3	579.7	899.4	116.5	302.4	NA	NA	2069.8	93.7	1.99844	1.103	4.67651	3.22732	NA	1.26369	NA	4.42643	0
0509-4	enigmae	Poales	Typhaceae	Typha	USNM	NA	68.9	235.9	110	152.5	79.6	380	421.9	119.5	65.8	540.1	871.7	106.4	287.6	110.6	65.9	1676.8	93.7	1.81611	1.12312	4.77387	3.06937	2.60036	1.21916	1.08047	3.9744	0
0509-6	enigmae	Poales	Typhaceae	Typha	USNM	88.9	60.7	236.5	119.5	144.3	79	368	397.3	127	84	524.6	866.2	111.2	291.6	91	NA	1881.7	87.3	1.5119	1.14209	4.65823	3.34021	3.2044	1.23298	1.3956	4.73622	0
0510-1	enigmae	Poales	Typhaceae	Typha	USNM	82.6	67.5	328.3	0	116.4	77.9	388.6	463.2	134.1	NA	545.5	828.6	104.8	311	135.8	NA	2085.4	107	NA	1.27958	4.98845	2.90654	2.29013	0.947304	0.987482	4.50216	1
0510-3	enigmae	Poales	Typhaceae	Typha	USNM	97.5	75.8	280.2	161.4	152	83.9	493.4	NA	138	72.9	641.6	1028.3	112.2	345.9	130.7	NA	2381.9	111.3	1.893	1.22995	5.88081	3.10782	2.64652	1.23448	1.05585	NA	0
0601-1	enigmae	Poales	Typhaceae	Typha	USNM	78.5	58.9	224.8	97.5	112.2	65.8	NA	480.3	123.8	65.3	507.1	807.8	108.4	280.7	91.8	NA	1836.1	82.2	1.89587	1.14207	NA	3.41484	3.05773	1.24867	1.34858	3.82282	0
0602-1	enigmae	Poales	Typhaceae	Typha	USNM	76.3	64.2	206.4	83.9	122.1	77	NA	450	122.1	58.6	524.9	851.8	103.7	301.1	114.6	NA	1756.4	88.3	2.08362	1.17743	NA	3.40997	2.6274	1.45882	1.06545	3.90311	0
0602-2	enigmae	Poales	Typhaceae	Typha	USNM	82.1	63.9	213.2	95.4	119.9	77.8	463.3	442.1	128.1	NA	541.5	855.7	101.9	306.2	113.2	NA	1888.8	89.9	NA	1.25711	5.95501	3.40601	2.70495	1.43621	1.13163	4.27234	0
0603-1	enigmae	Poales	Typhaceae	Typha	USNM	87.1	68.9	280.8	129.4	149.7	94	540.1	468.8	136	58.1	615.8	1019.2	113.1	344.7	119.2	NA	1815.2	95.3	2.34079	1.20248	5.74574	3.617	2.89178	1.22756	1.14094	3.87201	0
0603-2	enigmae	Poales	Typhaceae	Typha	USNM	81	69	305.9	0	130.4	78.1	488.2	450.1	126.1	56.6	NA	NA	NA	307.5	113.1	NA	1735.1	92.3	2.22792	NA	6.25096	3.33153	2.71883	1.00523	1.11494	3.85492	1
0604-1	enigmae	Poales	Typhaceae	Typha	USNM	80.8	72.1	274.1	133.9	132.2	88.5	420.2	434.4	139.9	65.7	616.2	979.7	114.6	330.8	134.5	NA	1841.2	116	2.12938	1.22077	4.74802	2.85172	2.45948	1.20686	1.04015	4.23849	0
0605-1	enigmae	Poales	Typhaceae	Typha	USNM	73.1	55.3	274	0	105.6	66.2	384.4	423.5	115.1	58.3	455.1	722.9	94.2	295.7	100.2	NA	1855.5	102.4	1.97427	1.22187	5.80665	2.8877	2.9511	1.0792	1.1487	4.38135	1
0605-2	enigmae	Poales	Typhaceae	Typha	USNM	76.8	40.7	327.9	0	109.8	69.9	416.8	424	114.4	60.9	NA	NA	NA	306.4	104.9	NA	1663.2	92	1.87849	NA	5.9628	3.33043	2.92088	0.934431	1.09056	3.92264	1
0606-1	enigmae	Poales	Typhaceae	Typha	USNM	69.2	57.2	197	108.3	106.6	85.8	415.5	418.7	116.9	60	444.4	720.9	94	278.6	93.5	74.4	1523.1	83.8	1.94833	1.24362	4.84266	3.32458	2.97968	1.41421	1.25027	3.63769	0
0607-1	enigmae	Poales	Typhaceae	Typha	USNM	71.5	63	252.2	128.1	114.7	87.8	477.9	453.8	122	61.8	586.3	910.6	104.2	336.4	133.8	72.3	NA	108.2	1.97411	1.17083	5.44305	3.10906	2.5142	1.33386	0.911809	NA	0
0607-2	enigmae	Poales	Typhaceae	Typha	USNM	66.1	62.6	193.7	95.3	107.2	78.1	400	416.2	120.8	55.8	414.5	NA	NA	426.6	NA	NA	1620.5	61.4	2.16487	NA	5.12164	6.94788	NA	2.20237	NA	3.89356	0
0608-1	enigmae	Poales	Typhaceae	Typha	USNM	81.6	60.2	240.3	121.2	132.2	79.8	437.7	467.8	118	56.5	546.2	861.9	101.6	253.8	127.5	62.6	2003.8	105.4	2.0885	1.16142	5.48496	2.40797	1.99059	1.05618	0.92549	4.28345	0
0608-2	enigmae	Poales	Typhaceae	Typha	USNM	65.9	59.7	240.3	121.7	123.7	79.1	NA	466.7	119.5	54.3	497.5	793.9	104.7	255	120	70.8	2010.1	58.1	2.20074	1.14136	NA	4.38898	2.125	1.06117	0.995833	4.30705	0
0608-3	enigmae	Poales	Typhaceae	Typha	USNM	76	60.9	227.6	117	117.1	76.8	444.6	464.6	128.2	61.8	529.7	833	106.9	297.3	130	67.6	1922.7	76.9	2.07443	1.19925	5.78906	3.86606	2.28692	1.30624	0.986154	4.1384	0
0609-1	enigmae	Poales	Typhaceae	Typha	USNM	75.1	56.7	240	140.7	121.1	82.7	NA	486.1	134.9	63.6	580.4	944.1	114.5	317.1	145	54.3	2320.6	109	2.12107	1.17817	NA	2.90917	2.1869	1.32125	0.930345	4.77391	0
0609-2	enigmae	Poales	Typhaceae	Typha	USNM	78.5	64	367.2	0	127.3	72.8	447.3	496.5	127.8	63.5	579.8	942.7	108.5	315.6	141.5	69.5	2314.4	111	2.0126	1.17788	6.14423	2.84324	2.23039	0.859477	0.90318	4.66143	1
0609-3	enigmae	Poales	Typhaceae	Typha	USNM	68.6	64.5	207.1	113	119.1	74.2	422.7	443.1	120.3	55.7	461.2	766.6	92.4	261.1	106	NA	1668.7	79.5	2.15978	1.30195	5.69677	3.28428	2.46321	1.26074	1.13491	3.76597	0
0698-2	enigmae	Poales	Typhaceae	Typha	USNM	66.5	58.8	281.7	0	92.1	73.3	430.6	424	116.7	58	456.5	749.8	94.4	263	NA	40.4	1605.3	83.8	2.01207	1.23623	5.87449	3.13842	NA	0.933617	NA	3.78608	1
0698-3	enigmae	Poales	Typhaceae	Typha	USNM	67.1	60.7	310.2	0	108.6	74.3	392.2	424	111.4	52	482.4	751.2	101.9	284.9	107.9	53	1705	79.4	2.14231	1.09323	5.2786	3.58816	2.64041	0.91844	1.03244	4.02123	1
0699-1	enigmae	Poales	Typhaceae	Typha	USNM	68	61.3	303.4	0	96.6	75.1	441.1	406.8	111.5	61.7	459.6	754.7	98.8	264.6	109	71.4	1832.4	82.1	1.80713	1.12854	5.8735	3.2229	2.42752	0.872116	1.02294	4.50442	1
0699-2	enigmae	Poales	Typhaceae	Typha	USNM	59.7	63.1	207.2	108.9	111.3	76	438.4	414.3	118.7	63.6	474.1	790.8	96.1	301	116.7	70	1814.3	85	1.86635	1.23517	5.76842	3.54118	2.57926	1.4527	1.01714	4.37919	0
0699-3	enigmae	Poales	Typhaceae	Typha	USNM	66.3	63	221.1	110.8	109.4	75.8	437.8	430.8	119.2	63.1	468.8	766.2	95.1	299.5	109.5	64.9	1931.8	73.6	1.88906	1.25342	5.77573	4.06929	2.73516	1.35459	1.08858	4.48422	0
0700-1	enigmae	Poales	Typhaceae	Typha	USNM	65.2	67.2	279	0	101.4	77.4	421.3	431.1	120.3	NA	449.1	726.1	97.6	285.9	102.7	41.9	1804.1	76.6	NA	1.23258	5.44315	3.73238	2.78384	1.02473	1.17137	4.18488	1
0700-2	enigmae	Poales	Typhaceae	Typha	USNM	54.9	55.9	170.3	91.9	98.3	77.4	373.3	418.9	114.1	58.5	405.2	632.6	95.6	239	95.2	44.1	1562.1	63.2	1.95043	1.19351	4.823	3.78165	2.5105	1.40341	1.19853	3.72905	0
0700-3	enigmae	Poales	Typhaceae	Typha	USNM	71.1	60.5	192.6	86.4	105.4	79.2	377.9	435.1	119.5	59.5	469.4	749	97.1	271.2	111.2	36.1	1795.4	73.9	2.0084	1.23069	4.77146	3.66982	2.43885	1.4081	1.07464	4.12641	0
0700-4	enigmae	Poales	Typhaceae	Typha	USNM	71	59.4	294.7	0	103.3	82.5	405.5	399.9	120.7	61.1	427	NA	NA	268.4	103.7	52.5	1706.7	73.8	1.97545	NA	4.91515	3.63686	2.58824	0.910757	1.16393	4.26782	1
0700-5	enigmae	Poales	Typhaceae	Typha	USNM	68.6	57.6	172.3	98.4	104.8	78.9	386.7	NA	119.1	NA	424.9	690.6	98.8	241.4	108.5	68.1	1683.8	57.9	NA	1.20547	4.90114	4.16926	2.22488	1.40104	1.0977	NA	0
0701-1	enigmae	Poales	Typhaceae	Typha	USNM	75.9	64.2	231	113.4	137	83.6	364.7	455.5	123.1	65.2	NA	NA	NA	303.6	132.2	41.8	1984.4	91.7	1.88804	NA	4.36244	3.3108	2.29652	1.31429	0.931165	4.35653	0
0701-2	enigmae	Poales	Typhaceae	Typha	USNM	73.7	68	210.6	115.1	120.9	75.1	424	456.5	130.4	NA	507.5	813.8	102.8	300.3	NA	40.3	1986.7	78.7	NA	1.26848	5.64581	3.81576	NA	1.42593	NA	4.35203	0
0701-3	enigmae	Poales	Typhaceae	Typha	USNM	66.7	63.8	239.1	123.8	129.8	80	483.3	481	119.5	62.8	540.5	860.2	107.3	299.2	126	34.1	1974.7	89.2	1.90287	1.1137	6.04125	3.35426	2.3746	1.25136	0.948413	4.10541	0
0701-4	enigmae	Poales	Typhaceae	Typha	USNM	73.2	68.5	334.5	0	117	76.4	471.6	435	116.9	NA	501.6	835	99.8	289.2	100.6	53.3	1834.2	78.7	NA	1.17134	6.17277	3.67471	2.87475	0.864574	1.16203	4.21655	1
0837-1	enigmae	Poales	Typhaceae	Typha	CNC	70	73	294	175.6	156.5	91	492.1	490.9	133.3	72.2	610.1	959.2	114.5	329.4	140.3	83	2372.7	133.7	1.84626	1.16419	5.40769	2.46372	2.34783	1.12041	0.950107	4.83337	0
0840-1	enigmae	Poales	Typhaceae	Typha	CNC	70.9	64.7	255.5	144.1	144.6	88.6	461.4	427.3	117.3	NA	554.2	850.7	100.2	310.3	120.7	70.4	1828.6	86.9	NA	1.17066	5.20767	3.57077	2.57084	1.21448	0.971831	4.27943	0
0841-1	enigmae	Poales	Typhaceae	Typha	CNC	65.8	62.8	214.7	111.6	123.3	77.4	425.4	419.1	114.4	60.7	475.9	737.1	97.6	278.5	122.7	56.3	1800.3	80.9	1.88468	1.17213	5.49612	3.44252	2.26976	1.29716	0.932355	4.29563	0
0842-1	enigmae	Poales	Typhaceae	Typha	CNC	72.3	61.2	195.4	97.2	107.2	72.2	446.2	435.9	113	NA	503.4	783.7	103.9	294.4	122	NA	2013.4	82.7	NA	1.08758	6.18006	3.55985	2.41311	1.50665	0.92623	4.61895	0
0844-1	enigmae	Poales	Typhaceae	Typha	CNC	73.9	68.4	282.2	168.6	149.9	91	516.4	466	129.4	66.4	611.4	1006.6	111.3	353	150	51.3	2491.8	92.3	1.9488	1.16262	5.67473	3.82449	2.35333	1.25089	0.862667	5.34721	0
0844-2	enigmae	Poales	Typhaceae	Typha	CNC	73.7	72.2	273.1	160	155	87.9	536.5	480.6	130.1	74.2	589.6	947.4	112.7	363.9	126	89	2128.7	107.1	1.75337	1.15439	6.10353	3.39776	2.8881	1.33248	1.03254	4.42926	0
0844-3	enigmae	Poales	Typhaceae	Typha	CNC	87.1	79.4	311.7	196.1	187.4	104.1	590.9	518.6	139.2	75.1	686.2	1139.4	112.3	397.2	142.9	61.5	2203.1	108.2	1.85353	1.23954	5.67627	3.67098	2.77957	1.2743	0.974108	4.24817	0
0844-4	enigmae	Poales	Typhaceae	Typha	CNC	97	82.3	293.9	186.6	161.3	89.3	557.5	527.7	130.3	71.5	645.1	1056	118.1	365.2	115.8	70.3	2157.2	108.7	1.82238	1.1033	6.243	3.35971	3.15371	1.2426	1.12522	4.08793	0
0861-1	enigmae	Poales	Typhaceae	Typha	USNM	61.4	60	206.1	111.8	109.2	79.5	406.9	449.1	121.5	60.6	532.6	813.6	97.4	279.1	108.9	29.4	1878.1	91	2.00495	1.24743	5.11824	3.06703	2.5629	1.3542	1.1157	4.18192	0
0861-2	enigmae	Poales	Typhaceae	Typha	USNM	68.9	64.8	188.9	102.8	97.4	73.2	382.6	438.3	112.2	59.6	453	714.6	NA	270.3	88.9	28.6	1868.7	82.2	1.88255	NA	5.22678	3.28832	3.04049	1.43092	1.26209	4.26352	0
0861-3	enigmae	Poales	Typhaceae	Typha	USNM	61.7	57.1	222.7	115.6	121	73.3	430.7	445.8	114.8	59	512.6	803.5	106.2	282.9	111.2	38	1821.2	67.6	1.94576	1.08098	5.87585	4.18491	2.54406	1.27032	1.03237	4.08524	0
0861-4	enigmae	Poales	Typhaceae	Typha	USNM	64.9	56.2	197.4	114.9	107.9	78.1	NA	431	119.5	58.9	472.8	742.3	100.3	297.9	104.4	20.1	1767.8	86.1	2.02886	1.19143	NA	3.45993	2.85345	1.50912	1.14464	4.10162	0
0861-5	enigmae	Poales	Typhaceae	Typha	USNM	61.4	54.3	180.4	99.6	108.9	79	378.2	438.4	116.1	60.1	486.1	749	97.9	249.8	NA	24.4	1682.5	71.2	1.93178	1.1859	4.78734	3.50843	NA	1.3847	NA	3.83782	0
0861-6	enigmae	Poales	Typhaceae	Typha	USNM	65.3	53.6	267.5	0	113.9	74.1	382.9	423.5	112.5	53.4	448.9	699	96.6	250.2	103.7	22.5	1662.6	71.9	2.10674	1.1646	5.16734	3.47983	2.41273	0.935327	1.08486	3.92586	1
0862-1	enigmae	Poales	Typhaceae	Typha	USNM	63.1	62.4	NA	NA	NA	NA	NA	476.3	126.6	NA	575.5	881.2	99.5	342.2	127.1	34.9	2006.9	107.3	NA	1.27236	NA	3.18919	2.69237	NA	0.996066	4.21352	NA
0862-2	enigmae	Poales	Typhaceae	Typha	USNM	63.2	57.6	278.5	154.5	147.7	85.4	442.7	NA	125.4	62.4	603.5	940.3	99.2	346.9	138.9	41.1	2181.1	111.4	2.00962	1.26411	5.18384	3.114	2.49748	1.2456	0.902808	NA	0
0862-3	enigmae	Poales	Typhaceae	Typha	USNM	74.5	70.9	288	151.9	135.9	87.2	462.1	489.6	127.7	63.1	607.4	937.3	111.8	353.7	124.2	57.9	1971.1	112.6	2.02377	1.14222	5.29931	3.14121	2.84783	1.22812	1.02818	4.02594	0
0862-4	enigmae	Poales	Typhaceae	Typha	USNM	70.4	59.1	301.8	150.1	146.4	85.9	440.4	486	135.1	61.2	602.9	NA	NA	364.8	126.4	69.5	1856	119.3	2.20752	NA	5.12689	3.05784	2.88608	1.20875	1.06883	3.81893	0
0862-5	enigmae	Poales	Typhaceae	Typha	USNM	74.3	72.5	260.8	131.3	119.6	79.3	446.9	464.7	131	69.1	572.2	905.7	100.5	307.4	129.6	NA	1954.6	90.2	1.8958	1.30348	5.63556	3.40798	2.37191	1.17868	1.0108	4.20615	0
0865-3	enigmae	Poales	Typhaceae	Typha	USNM	66.6	54.1	210.6	116.1	120	80.5	455.4	446.3	122.1	60.4	490.3	813.3	98.4	308	106.5	52.3	1707.1	98.5	2.02152	1.24085	5.65714	3.1269	2.89202	1.46249	1.14648	3.82501	0
0865-4	enigmae	Poales	Typhaceae	Typha	USNM	79.4	61.7	288.2	174.3	146.1	93	490.6	489.9	139.5	64.2	599.8	975.1	95.5	362.8	140.7	60	2073.4	101.5	2.1729	1.46073	5.27527	3.57438	2.57854	1.25885	0.991471	4.23229	0
0865-5	enigmae	Poales	Typhaceae	Typha	USNM	77.4	67.4	351.1	0	117.5	82	447.3	461.9	136.5	NA	561.1	892.1	105.6	339.8	NA	31.2	1867.3	89	NA	1.29261	5.45488	3.81798	NA	0.967815	NA	4.04265	1
0866-4	enigmae	Poales	Typhaceae	Typha	USNM	57.6	52.6	204	106.8	93.2	68.5	383.8	404.5	115.1	58.2	407.8	681.5	89.8	259	96.6	39.4	1537.6	74.8	1.97766	1.28174	5.60292	3.46257	2.68116	1.26961	1.19151	3.80124	0
0866-5	enigmae	Poales	Typhaceae	Typha	USNM	63.2	55.2	220.5	108.6	100.8	74.6	398.7	401.5	111.6	54.2	430.8	412.4	102.6	276.3	108.4	33.1	1435	85.4	2.05904	1.08772	5.3445	3.23536	2.54889	1.25306	1.02952	3.5741	0
0867-1	enigmae	Poales	Typhaceae	Typha	USNM	69.5	56	296.3	0	117	73	NA	432.6	124	NA	447.3	416.2	96.7	273.1	109.9	54	1549.4	74.4	NA	1.28232	NA	3.6707	2.48499	0.921701	1.1283	3.5816	1
0867-2	enigmae	Poales	Typhaceae	Typha	USNM	63.9	53.4	184.5	98.3	103.9	76	437.9	421.4	106.5	59.8	447.7	725.7	107.3	261.8	97.7	28.1	1543.2	66	1.78094	0.992544	5.76184	3.96667	2.67963	1.41897	1.09007	3.66208	0
0867-3	enigmae	Poales	Typhaceae	Typha	USNM	60.4	56.4	234	114	107.8	79.5	452.8	439.8	114.6	57.8	499.4	766.3	101.6	296.2	126.2	63.6	1631.3	86.2	1.9827	1.12795	5.6956	3.43619	2.34707	1.26581	0.908082	3.70919	0
0193-2	maidis	Poales	Poaceae	Hordeum	USNM	NA	NA	NA	NA	NA	NA	NA	414.3	81.4	83.4	398.5	667.5	84.6	149.63	121.6	NA	1938.3	72.8	0.976019	0.962175	NA	2.05536	1.23051	NA	0.669408	4.67849	NA
0198-1	maidis	Poales	Poaceae	Hordeum	USNM	54.8	53.8	199.5	127.3	114.2	88.9	209.6	421.8	87	73.9	NA	NA	NA	158.6	130.1	NA	2158.7	74.9	1.17727	NA	2.35771	2.11749	1.21906	0.794987	0.668716	5.11783	0
0199-1	maidis	Poales	Poaceae	Hordeum	USNM	57	53.1	227.6	120.9	122.1	89	233.3	400.6	89.2	57.4	453.9	744.6	90.4	172.3	118	NA	2273.9	58	1.55401	0.986726	2.62135	2.97069	1.46017	0.75703	0.755932	5.67624	0
0201-1	maidis	Poales	Poaceae	Panicum	USNM	50.8	52	228	122.2	121	94.1	211.7	405.5	83.4	52.8	430	681.4	81	157.6	114.7	57.5	2019.9	46.6	1.57955	1.02963	2.24973	3.38197	1.37402	0.691228	0.727114	4.98126	0
0201-2	maidis	Poales	Poaceae	Panicum	USNM	56.4	54	248.2	134.8	114.8	90.6	223.9	411.9	83.2	61.6	428.2	688.6	79.3	157.5	107.1	56.2	1918	45.6	1.35065	1.04918	2.4713	3.45395	1.47059	0.634569	0.776844	4.65647	0
0202-1	maidis	Poales	Poaceae	Panicum	USNM	51.9	46.9	198.1	111.6	101.7	86.7	205.7	401.9	85.9	60.5	436	769.9	78.5	163.3	119.1	55.5	2037.2	50.2	1.41983	1.09427	2.37255	3.25299	1.37112	0.824331	0.721243	5.06892	0
0204-4	maidis	Poales	Poaceae	Panicum	USNM	52.1	49.1	156.3	74.2	80.2	71.4	143.8	354	68.7	57.4	371.9	562.4	76.9	160.9	123.8	62.3	1821.2	47.4	1.19686	0.893368	2.01401	3.39451	1.29968	1.02943	0.554927	5.14463	0
0205-1	maidis	Poales	Poaceae	Panicum	USNM	49.8	43.7	132.7	87.2	81.3	71.6	143	336.7	69.7	47.9	322.1	514.1	70.4	155.6	98.1	65.4	1699.2	49.1	1.45511	0.990057	1.99721	3.16904	1.58614	1.17257	0.710499	5.04663	0
0205-2	maidis	Poales	Poaceae	Panicum	USNM	50.2	49.2	186	95.9	98.1	73.4	181.4	379.9	81.8	NA	390.1	620.1	80.2	173.1	117.1	58.9	1980.9	56.7	NA	1.01995	2.47139	3.05291	1.47822	0.930645	0.698548	5.21427	0
0207-4	maidis	Poales	Poaceae	Saccharum	USNM	61.2	48	168.1	94.5	94.7	74.8	168	NA	82.6	49.3	NA	NA	NA	157.3	NA	NA	1692.3	38.8	1.67546	NA	2.24599	4.05412	NA	0.935753	NA	NA	0
0207-5	maidis	Poales	Poaceae	Saccharum	USNM	NA	46	133.5	88.4	90.3	77.1	170.1	336.8	78.3	43.5	NA	NA	NA	156	NA	NA	NA	37.9	1.8	NA	2.20623	4.11609	NA	1.16854	NA	NA	0
0209-1	maidis	Poales	Poaceae	Sorghum	USNM	81.4	66.7	339.8	176	166.4	118	267.9	NA	102.1	57.8	NA	NA	NA	207.7	154.8	NA	2785.6	89.1	1.76644	NA	2.27034	2.33109	1.34173	0.611242	0.659561	NA	0
0209-4	maidis	Poales	Poaceae	Sorghum	USNM	56	69.2	235.1	133.7	127.6	106.2	224.2	401.9	94.9	66.8	540.3	892.9	91.2	203.8	140.3	NA	2320.5	87.5	1.42066	1.04057	2.11111	2.32914	1.4526	0.866865	0.676408	5.77382	0
0210-1	maidis	Poales	Poaceae	Sorghum	USNM	53.4	60.4	155	94.2	95.1	87.1	160.8	352.9	80.6	53.8	416.5	587.3	82.7	184.7	118.3	67.3	2212.7	39.4	1.49814	0.974607	1.84615	4.68782	1.56128	1.19161	0.681319	6.27005	0
0210-3	maidis	Poales	Poaceae	Sorghum	USNM	52.1	53.2	144.9	86.1	88.3	79.4	NA	349.4	NA	NA	NA	NA	73.8	178.6	NA	70.2	1885.1	65.3	NA	NA	NA	2.73507	NA	1.23257	NA	5.39525	0
0211-2	maidis	Poales	Poaceae	Sorghum	USNM	52.8	42.1	135.1	84.8	83.6	72.8	148.9	333.5	77.9	62.4	325.6	NA	NA	153.1	99.2	NA	1929.2	33.9	1.2484	NA	2.04533	4.51622	1.54335	1.13323	0.785282	5.78471	0
0211-3	maidis	Poales	Poaceae	Sorghum	USNM	56.8	51.4	186.6	107.1	102.7	85.2	153.3	381.9	79.4	60.4	440	655.8	86.3	192.7	111.5	63.1	1871.4	64	1.31457	0.920046	1.7993	3.01094	1.72825	1.03269	0.712108	4.90024	0
0212-1	maidis	Poales	Poaceae	Sorghum	USNM	53.8	46.6	166.8	106.8	93.8	85.6	169.6	377.1	85.9	52.4	422.6	676.6	82.3	154.6	107.7	NA	1801.2	42.8	1.63931	1.04374	1.98131	3.61215	1.43547	0.926859	0.797586	4.77645	0
0212-3	maidis	Poales	Poaceae	Sorghum	USNM	46.4	37	137.6	80.5	80	71.2	147.6	325.8	74.9	42.7	NA	512.4	NA	137.5	101.4	NA	1347.9	34.4	1.7541	NA	2.07303	3.99709	1.35602	0.999273	0.738659	4.1372	0
0213-1	maidis	Poales	Poaceae	Sorghum	USNM	50.3	47.9	169.5	102.8	99.8	86.3	160.2	401.4	84.2	61.1	401.3	629.4	83.2	157.5	120.6	68.4	2278.5	62.6	1.37807	1.01202	1.85632	2.51597	1.30597	0.929204	0.698176	5.67638	0
0214-1	maidis	Poales	Poaceae	Sorghum	USNM	59.4	46.7	210.9	118.1	113.8	92.4	204.3	398.7	88.7	55.8	519.1	819.4	95.5	197.8	117.4	69.8	2376.8	69.6	1.58961	0.928796	2.21104	2.84195	1.68484	0.937885	0.755537	5.96137	0
0217-2	maidis	Poales	Poaceae	Sorghum	USNM	38.8	42.6	148.5	0	63.5	70.6	131.8	296.3	67.6	55.4	296.5	411.5	73.3	120.2	93.9	62.3	1212.2	38.2	1.22022	0.922237	1.86686	3.1466	1.28009	0.809428	0.719915	4.09112	1
0221-1	maidis	Poales	Poaceae	Sorghum	USNM	58.3	54.4	256.1	140.9	123.2	102.6	192.4	423.9	78.8	58.7	521.2	847.5	88.3	179.1	131.8	63.1	2169.6	60.2	1.34242	0.892412	1.87524	2.97508	1.35888	0.699336	0.597876	5.11819	0
0222-2	maidis	Poales	Poaceae	Sorghum	USNM	54.3	43	200.3	115.4	97.9	88	168.4	400.6	87	53	496.2	783.3	90.63	179.4	136.8	75.1	2337.9	69.9	1.64151	0.959947	1.91364	2.56652	1.3114	0.895657	0.635965	5.836	0
0222-4	maidis	Poales	Poaceae	Sorghum	USNM	59.7	55.3	218.4	135.9	112.3	91.6	183.2	417.1	80.2	58.3	508.5	804.9	96.3	196.5	139.1	NA	2321.9	69.5	1.37564	0.832814	2	2.82734	1.41265	0.899725	0.576564	5.56677	0
0223-3	maidis	Poales	Poaceae	Sorghum	USNM	60.3	55.2	235.5	140.6	118.7	100.8	212.5	406.3	83.1	51.9	469.9	732.5	92.9	189.3	130.8	NA	2073.5	65.2	1.60116	0.89451	2.10813	2.90337	1.44725	0.803822	0.635321	5.10337	0
0223-7	maidis	Poales	Poaceae	Sorghum	USNM	65.2	52.1	246.5	139.6	129.4	97	212.9	426	79.5	55.7	NA	NA	NA	201.1	133.4	50.3	2081.5	56.3	1.42729	NA	2.19485	3.57194	1.5075	0.815822	0.595952	4.88615	0
0224-1	maidis	Poales	Poaceae	Sorghum	USNM	56.3	62.1	195.6	112.5	106.9	93.2	196.8	404.3	80.6	66.6	402.1	675.3	89.7	162.1	193.8	60.4	2081.3	82.3	1.21021	0.898551	2.11159	1.96962	0.836429	0.828732	0.415893	5.14791	0
0224-3	maidis	Poales	Poaceae	Sorghum	USNM	58.7	53.4	200.1	129.2	104.5	89.9	189.7	402.1	77.4	65.2	431.8	711.2	92.5	180.6	118.3	54.5	2024.5	75.3	1.18712	0.836757	2.11012	2.39841	1.52663	0.902549	0.654269	5.03482	0
0225-1	maidis	Poales	Poaceae	Sorghum	USNM	56.6	50.7	188.3	118.3	109.4	89.3	198.6	403.7	82.2	53	425.8	559.3	97	169.3	127.1	51.7	1928.5	61	1.55094	0.847423	2.22396	2.77541	1.33202	0.899097	0.646735	4.77706	0
0226-1	maidis	Poales	Poaceae	Sorghum	USNM	55.7	52.3	161.5	93.1	84.8	69.8	153.5	351.2	74.5	60.6	393.4	569.5	75.3	156.2	118.8	NA	1664.5	43.3	1.22937	0.989376	2.19914	3.60739	1.31481	0.967183	0.627104	4.73946	0
0228-1	maidis	Poales	Poaceae	"rice"	USNM	53.9	40.5	235	0	89.9	70.7	149.2	417.1	81.1	71.3	416.7	626.5	89.8	194.3	143	NA	1978	67.1	1.13745	0.903118	2.11033	2.89568	1.35874	0.826809	0.567133	4.74227	1
0228-2	maidis	Poales	Poaceae	"rice"	USNM	55.1	48.8	238	0	83.9	80	150	396.3	76.4	72.9	360.9	547.6	85.9	160	124.5	57.1	1897.4	71	1.04801	0.889406	1.875	2.25352	1.28514	0.672269	0.613655	4.78779	1
0228-3	maidis	Poales	Poaceae	"rice"	USNM	54	45	228.4	0	83.6	80.2	140	394	78.9	77.3	370.9	567.7	77.3	176.8	127	66.6	1940.9	71.7	1.0207	1.0207	1.74564	2.46583	1.39213	0.774081	0.62126	4.92614	1
0229-1	maidis	Poales	Poaceae	"rice"	USNM	44.7	45	179.2	0	67.3	63.3	133.4	337.3	NA	NA	291.5	NA	NA	127.4	92.2	48.8	1765.5	48.7	NA	NA	2.10742	2.61602	1.38178	0.710938	NA	5.23421	1
0230-1	maidis	Poales	Poaceae	Eragrostis	USNM	37.5	41.9	119.5	74.5	75	76.1	149.4	311.7	70	48.3	256.7	431.8	66.9	116.6	84	57.7	1507.7	24.6	1.44928	1.04634	1.96321	4.73984	1.3881	0.975732	0.833333	4.83702	0
0230-3	maidis	Poales	Poaceae	Eragrostis	USNM	42.5	42	149.9	0	62.3	65.6	146.3	323.5	75.4	54.1	250	405.5	69.9	120.3	96.7	NA	1377.8	36.5	1.39372	1.07868	2.23018	3.29589	1.24405	0.802535	0.779731	4.25904	1
0231-3	maidis	Poales	Poaceae	Ixophorus	USNM	50.8	45.9	124.9	84.4	75.2	71.7	169.8	NA	77	58.6	300.5	501.9	79.4	134.5	NA	57.6	1437.4	60.3	1.31399	0.969773	2.3682	2.23051	NA	1.07686	NA	NA	0
0231-4	maidis	Poales	Poaceae	Ixophorus	USNM	51.1	49.4	131.8	94.7	91.8	80.2	185.6	349.3	77.7	61	365.3	548.3	80	150.5	115	NA	1727.7	55.6	1.27377	0.97125	2.31421	2.70683	1.3087	1.14188	0.675652	4.94618	0
0233-1	maidis	Poales	Poaceae	Bromus	USNM	65.2	57.5	190.9	121.1	115.1	90.1	203.3	406.1	89.2	NA	NA	NA	NA	197.4	144	63	2570.7	94	NA	NA	2.25638	2.1	1.37083	1.03405	0.619444	6.33021	0
0235-1	maidis	Poales	Poaceae	Agrostis	USNM	54.1	49.1	133.9	88.4	83.1	81.2	169.8	388.2	81.7	73.9	380.8	597	80.9	170.9	122.4	NA	2133.1	76.5	1.10555	1.00989	2.09113	2.23399	1.39624	1.27633	0.667484	5.49485	0
0241-1	maidis	Poales	Poaceae	Paspalum	USNM	52.7	48.5	199.3	111.9	107.1	84.5	194.9	400.8	76.1	49.9	458.5	NA	NA	188.4	122.8	60.2	2008.4	55.7	1.52505	NA	2.30651	3.38241	1.5342	0.945309	0.619707	5.01098	0
0242-1	maidis	Poales	Poaceae	Paspalum	USNM	58.4	47.9	192.1	132.6	115.4	93.1	181.3	345.3	87.1	54.4	498.9	NA	NA	200.8	131.4	NA	2077.1	66.2	1.6011	NA	1.94737	3.03323	1.52816	1.04529	0.662861	6.01535	0
0244-2	maidis	Poales	Poaceae	Alopecurus	USNM	48.9	44.9	170.6	0	66.4	69.1	146.9	381.9	75.8	68.9	302.8	450.2	75.8	148.7	102.8	66.3	1646.3	70.6	1.10015	1	2.1259	2.10623	1.4465	0.87163	0.737354	4.31081	1
0244-3	maidis	Poales	Poaceae	Alopecurus	USNM	48.3	39.5	87.7	65.2	70.2	63.3	130.2	363	73.1	71.5	257	288.5	67.7	142.2	91.8	61.8	1617.1	59.4	1.02238	1.07976	2.05687	2.39394	1.54902	1.62144	0.796296	4.45482	0
0245-2	maidis	Poales	Poaceae	Echinochlea	USNM	58.9	40	142.7	93.7	78.9	79.1	139	396.3	72.6	66.1	NA	NA	NA	169.3	126.6	50.7	1966.2	64.3	1.09834	NA	1.75727	2.63297	1.33728	1.18641	0.57346	4.96139	0
0246-1	maidis	Poales	Poaceae	Zea	USNM	45.9	45.9	194.4	0	77.6	72.9	145	341.7	76.3	54.7	NA	NA	NA	135.5	119.7	58.6	1591.2	41	1.39488	NA	1.98903	3.30488	1.132	0.697016	0.637427	4.65672	1
0246-2	maidis	Poales	Poaceae	Zea	USNM	55.7	57.4	194.5	118.6	110.4	90.1	180.2	421.3	80	72.2	442.3	716.6	92.3	170.2	140.7	74.8	2043.6	64.6	1.10803	0.866739	2	2.63467	1.20967	0.875064	0.568586	4.8507	0
0246-3	maidis	Poales	Poaceae	Zea	USNM	57.6	61.5	192.9	102.1	108	86.6	170.6	411.6	87.2	70.6	463.6	715.9	90.3	158.2	134.7	74.1	2053.8	56	1.23513	0.96567	1.96998	2.825	1.17446	0.820114	0.647365	4.9898	0
0246-4	maidis	Poales	Poaceae	Zea	USNM	57.8	51	232.9	122.7	113.1	87.1	198.2	418.7	83.3	68	NA	NA	NA	197.3	NA	NA	2034.7	70.8	1.225	NA	2.27555	2.78672	NA	0.847145	NA	4.85957	0
0247-1	maidis	Poales	Poaceae	Zea	USNM	54.7	58.6	169.8	104.7	102.8	88.7	171.6	378.9	82.1	53.9	408.5	635.2	86.1	172.7	126.7	NA	NA	70.3	1.52319	0.953542	1.93461	2.45661	1.36306	1.01708	0.647987	NA	0
0247-2	maidis	Poales	Poaceae	Zea	USNM	45.7	51.7	186.6	100.6	95.9	89.7	157.6	380	77.3	52.2	407.2	651.5	83.9	169.5	138.2	58.4	1884	63.5	1.48084	0.921335	1.75697	2.66929	1.22648	0.90836	0.559334	4.95789	0
0247-3	maidis	Poales	Poaceae	Zea	USNM	51.3	48.4	168.8	87.3	95.3	84.5	171.1	367.4	78.9	58.2	391.6	617.1	82.9	165.8	125.6	NA	1919.5	62	1.35567	0.951749	2.02485	2.67419	1.32006	0.982227	0.628185	5.22455	0
0248-2	maidis	Poales	Poaceae	Zea	USNM	47.1	55.7	203.7	111.6	113.9	87	195	420.7	84.4	58.8	493.5	766.8	95.2	180.6	140.3	55.2	2259.5	79.4	1.43537	0.886555	2.24138	2.27456	1.28724	0.886598	0.601568	5.37081	0
0248-3	maidis	Poales	Poaceae	Zea	USNM	63.5	66.6	255.4	137.4	128.3	102.4	214.8	446.9	84.9	58.1	526.8	789.5	93	171.6	134.3	64.4	2193.1	58	1.46127	0.912903	2.09766	2.95862	1.27774	0.671887	0.632167	4.90736	0
0251-1	maidis	Poales	Poaceae	Zea	USNM	55.5	42.2	141.5	86.3	82.1	71.7	145.8	388.8	71.7	71.2	350.7	538.8	81.2	157.2	112.7	NA	2039	57.1	1.00702	0.883005	2.03347	2.75306	1.39485	1.11095	0.636202	5.24434	0
0251-2	maidis	Poales	Poaceae	Zea	USNM	54.3	51.1	128.9	90.1	78.4	70.5	145.2	393.2	73	71.4	345.9	544	74.2	162.7	117.2	52.8	1919.1	64.2	1.02241	0.983827	2.05957	2.53427	1.38823	1.26222	0.622867	4.88072	0
0252-2	maidis	Poales	Poaceae	Zea	USNM	64	56.7	210	106.9	105.9	100.1	167.9	387.4	89.5	61.6	497.5	721	100.3	199.2	164.5	55.5	1814.1	77.4	1.45292	0.892323	1.67732	2.57364	1.21094	0.948571	0.544073	4.68276	0
0252-3	maidis	Poales	Poaceae	Zea	USNM	63.5	60.7	239.8	119.1	115.4	94.4	199	415.5	83.4	69	499	756.8	96.3	200.3	143.2	NA	2142	71.9	1.2087	0.866044	2.10805	2.78581	1.39874	0.835279	0.582402	5.15523	0
0252-4	maidis	Poales	Poaceae	Zea	USNM	56.6	55.2	197.5	106.7	103.9	92.6	167.8	397.3	86.2	62.4	478.6	707.3	94.3	218.5	147.5	66.4	2085.1	73.4	1.38141	0.914104	1.8121	2.97684	1.48136	1.10633	0.584407	5.24818	0
0252-6	maidis	Poales	Poaceae	Zea	USNM	67.5	51.9	191.2	93.3	103.7	97.9	153.6	359.8	84.5	57.4	481.2	747.7	102.4	214.3	148.2	NA	2035.6	62	1.47213	0.825195	1.56895	3.45645	1.44602	1.12082	0.570175	5.65759	0
0253-1	maidis	Poales	Poaceae	Zea	USNM	60.9	56.5	211.1	120	113.2	94.2	181.9	427	86.7	78.4	496.5	753.4	97.2	213.6	151.5	59.8	2357.9	80.9	1.10587	0.891975	1.931	2.6403	1.4099	1.01184	0.572277	5.52201	0
0253-2	maidis	Poales	Poaceae	Zea	USNM	60.9	54.1	194.5	128.1	108.6	97.2	175.7	418	80	79.4	478.4	762	95	187.7	138.7	54	2159.4	71.6	1.00756	0.842105	1.80761	2.62151	1.35328	0.965039	0.576784	5.16603	0
0253-3	maidis	Poales	Poaceae	Zea	USNM	73	62.8	252.2	141.4	127.3	105.6	209.6	472.8	91.3	88.4	553.9	888.5	98.1	218	162	62.1	2513.4	85.3	1.03281	0.930683	1.98485	2.55569	1.34568	0.864393	0.56358	5.31599	0
0254-1	maidis	Poales	Poaceae	Zea	USNM	65.9	56.2	248	127.3	124.3	96	191	442.6	85.8	60.6	501.4	826.9	93.3	187.5	150	61.7	2344.9	73.1	1.41584	0.919614	1.98958	2.56498	1.25	0.756048	0.572	5.29801	0
0254-2	maidis	Poales	Poaceae	Zea	USNM	62.3	65.3	277.4	144.6	127.7	109	198.8	476.9	84.6	66.5	523.6	853.7	95.6	192.8	131.8	NA	2640.1	72	1.27218	0.884937	1.82385	2.67778	1.46282	0.695025	0.641882	5.53596	0
0254-3	maidis	Poales	Poaceae	Zea	USNM	58	56	225.9	127.1	119.3	84	185.2	431.7	94.4	55.6	502.5	798.6	91.5	199.7	124.8	58.2	2260.1	66.3	1.69784	1.03169	2.20476	3.01207	1.60016	0.884019	0.75641	5.23535	0
0255-1	maidis	Poales	Poaceae	Zea	USNM	56.2	61.3	265.1	143	123.9	98.7	201.3	NA	95.7	60.3	506.6	834.9	98.3	197.5	143.4	52.4	2493.1	71.8	1.58706	0.97355	2.03951	2.7507	1.37727	0.745002	0.667364	NA	0
0255-2	maidis	Poales	Poaceae	Zea	USNM	61.3	57.1	271	131	133.6	100.1	212.5	423.1	91.4	58.4	523.8	871.8	95	199	NA	57.2	2328.9	71.2	1.56507	0.962105	2.12288	2.79494	NA	0.734317	NA	5.50437	0
0257-2	maidis	Poales	Poaceae	Zea	USNM	59.8	51.9	207.3	124.5	115	90.1	206.5	392.5	85.3	54.2	446.8	722.4	92.5	178.8	131.6	48.2	2021.6	54.8	1.5738	0.922162	2.2919	3.26277	1.35866	0.862518	0.648176	5.15057	0
0257-4	maidis	Poales	Poaceae	Zea	USNM	66.6	57.7	247.5	133.6	126.7	99.9	210.2	405.9	82.8	59.9	507.8	807.7	96.3	201	140.1	47.5	2177.1	65.2	1.3823	0.859813	2.1041	3.08282	1.43469	0.812121	0.591006	5.36364	0
0257-5	maidis	Poales	Poaceae	Zea	USNM	66.4	52.3	227.3	133.7	111.5	83.1	192.6	389.4	89.6	53.2	NA	NA	NA	183.3	122.8	NA	1946.9	59.6	1.68421	NA	2.31769	3.0755	1.49267	0.806423	0.729642	4.99974	0
0258-1	maidis	Poales	Poaceae	Zea	USNM	48.8	56.3	193	110.4	107.7	83.9	173.4	403.6	79.9	62.5	454.6	729.8	87.3	188.3	131.9	58.1	2141.6	72.6	1.2784	0.915235	2.06675	2.59366	1.4276	0.975648	0.605762	5.30624	0
0258-2	maidis	Poales	Poaceae	Zea	USNM	61	58	214.6	133	111.7	91.4	201	412.7	83.4	67.3	462.8	NA	82	190.2	136.2	50.2	2143.3	71	1.23923	1.01707	2.19912	2.67887	1.39648	0.8863	0.612335	5.19336	0
0259-1	maidis	Poales	Poaceae	Zea	USNM	57.7	47.6	252.9	134.5	128.1	98.5	190.8	407.8	85.3	61.1	525.1	847.4	92.6	183.7	143	NA	2186.8	67.9	1.39607	0.921166	1.93706	2.70545	1.28462	0.726374	0.596503	5.36243	0
0259-5	maidis	Poales	Poaceae	Zea	USNM	56.5	59	208.5	117	105	92.9	200.4	416.2	80.6	61.1	480.9	777.5	87.7	189.1	133.8	55.5	2021.8	54.8	1.31915	0.919042	2.15716	3.45073	1.4133	0.906954	0.602392	4.85776	0
0260-3	maidis	Poales	Poaceae	Zea	USNM	68.1	61.7	241.2	140.5	125.3	103.3	220.2	440.7	91.8	57.8	NA	NA	NA	195.1	141.9	62.6	2497.5	65.8	1.58824	NA	2.13166	2.96505	1.37491	0.808872	0.646934	5.66712	0
0262-3	maidis	Poales	Poaceae	Zea	USNM	66.4	62.3	231.7	127.2	129.9	99.5	227.5	426.1	99.2	57.2	532.3	832.8	100.4	192.6	NA	55.4	2135.5	53.7	1.73427	0.988048	2.28643	3.58659	NA	0.831247	NA	5.01173	0
0264-1	maidis	Poales	Poaceae	Zea	USNM	60	60	211.2	123.3	113.2	92.2	185.3	412.6	94	47.7	515.2	837.2	87.1	179.4	142.1	64.2	2210.6	49.6	1.97065	1.07922	2.00976	3.61694	1.26249	0.849432	0.661506	5.35773	0
0265-4	maidis	Poales	Poaceae	Triticum	USNM	70.8	66.1	213.2	119.6	141.8	89.8	287.9	NA	80.9	57.4	406.8	647.7	82.2	250	170	NA	NA	62.7	1.40941	0.984185	3.20601	3.98724	1.47059	1.17261	0.475882	NA	0
0267-1	maidis	Poales	Poaceae	Triticum	USNM	66.4	59.7	206.1	126.6	107.1	88	211.2	435.7	89	71	505.8	795.6	87.2	169.8	101.5	41.2	2070.3	73.2	1.25352	1.02064	2.4	2.31967	1.67291	0.823872	0.876847	4.75166	0
0267-2	maidis	Poales	Poaceae	Triticum	USNM	64.9	52.9	168	116.5	99.1	85.9	175.5	405.9	82.6	65.9	413.2	697.2	84.5	171.7	129.1	NA	1931.3	61.2	1.25341	0.977515	2.04307	2.80556	1.32998	1.02202	0.639814	4.75807	0
0267-3	maidis	Poales	Poaceae	Triticum	USNM	55.6	53.3	218.7	113.3	116.3	90.2	190.8	414.2	86.8	72.7	NA	810.8	86.7	182.8	132.6	45.9	2078.7	63.9	1.19395	1.00115	2.1153	2.86072	1.37858	0.835848	0.6546	5.01859	0
0267-4	maidis	Poales	Poaceae	Triticum	USNM	58.8	55.3	178.1	109.3	100.1	87.6	178.4	421.3	83.9	64.7	436.1	720.2	87.8	180.1	139.6	58.2	2045.9	72.5	1.29675	0.955581	2.03653	2.48414	1.29011	1.01123	0.601003	4.85616	0
0268-1	maidis	Poales	Poaceae	Triticum	USNM	62	58.1	272.7	134.6	131.9	100.7	228.8	452.5	90.8	63.2	514.3	875.4	NA	174.6	130.1	NA	2313.8	62.4	1.43671	NA	2.2721	2.79808	1.34204	0.640264	0.697925	5.11337	0
0268-2	maidis	Poales	Poaceae	Triticum	USNM	57.8	64.1	274.4	138.2	129.8	91.9	200.8	436.7	89	64.3	494.9	813.3	91.5	196.7	140.2	50.1	2150.2	86.1	1.38414	0.972678	2.18498	2.28455	1.403	0.716837	0.634807	4.92375	0
0269-1	maidis	Poales	Poaceae	Triticum	USNM	62.6	62.3	282.2	152.8	135.4	97.5	247.1	470.3	94.5	69.4	570.4	919	102.6	196.8	141.3	52.5	2713	80.1	1.36167	0.921053	2.53436	2.45693	1.39278	0.697378	0.66879	5.76866	0
0269-3	maidis	Poales	Poaceae	Triticum	USNM	62.1	61.7	274.9	141.7	125.2	96.6	229.8	NA	90.6	78.4	548.3	881	103.1	194.8	160.2	NA	2798.9	87	1.15561	0.878758	2.37888	2.23908	1.21598	0.708621	0.565543	NA	0
0270-2	maidis	Poales	Poaceae	Triticum	USNM	51.1	58.3	193.1	127.2	109.3	92.4	213.9	423.8	86.7	55.7	396.4	604.3	NA	202.9	136.6	54.5	2322.6	72.4	1.55655	NA	2.31494	2.80249	1.48536	1.05075	0.6347	5.48042	0
0270-3	maidis	Poales	Poaceae	Triticum	USNM	52.1	52.6	173.2	105.2	97.7	75.3	180.6	388.2	80.7	50.3	421.1	641.1	79	177.4	130.6	60.7	2026.5	64.1	1.60437	1.02152	2.39841	2.76755	1.35835	1.02425	0.617917	5.22025	0
0273-2	maidis	Poales	Poaceae	Triticum	USNM	56.4	52.8	177.1	99.9	109.7	83.7	189.9	404.4	82.7	52.7	405.1	691.7	87.1	149.3	116.9	56.9	2188.9	53.5	1.56926	0.949483	2.26882	2.79065	1.27716	0.843027	0.707442	5.41271	0
0276-2	maidis	Poales	Poaceae	Triticum	USNM	41	39.4	167.3	0	71	66.5	130.4	333.5	69.3	59.8	245.6	397.6	66.5	108.4	82.8	50	1616.2	44.4	1.15886	1.04211	1.9609	2.44144	1.30918	0.647938	0.836957	4.84618	1
0049-1	musae	Zingiberales	Strelitziaceae	Strelitzia	FSCA	70.7	64.6	222.4	168.8	161.1	101.9	323.8	464	130.6	64.5	515	927.4	95.9	204.4	144.2	49.2	2263.7	58.2	2.02481	1.36184	3.17763	3.51203	1.41748	0.919065	0.905687	4.87866	0
0050-1	musae	Zingiberales	Strelitziaceae	Strelitzia	FSCA	65.5	53.3	155.1	107.7	106.2	86.2	282.6	395.2	124.7	55.4	374	607.8	82.1	152.4	112.4	65.7	1725.8	45.6	2.2509	1.51888	3.27842	3.34211	1.35587	0.982592	1.10943	4.3669	0
0051-1	musae	Zingiberales	Strelitziaceae	Strelitzia	FSCA	72.5	53.3	185.7	109.7	122.4	87.5	287.3	429.3	135.1	61.8	420.5	690.2	85.7	190	131.1	62.5	1800.9	64.7	2.18608	1.57643	3.28343	2.93663	1.44928	1.02316	1.03051	4.19497	0
0511-1	musae	Zingiberales	Strelitziaceae	Strelitzia	USNM	67.1	53.5	318.9	0	143.7	94.1	369.8	450.9	134.8	65.9	524.9	881	90.6	208.3	158.3	53.2	1935	81.4	2.04552	1.48786	3.92986	2.55897	1.31586	0.653183	0.851548	4.29142	1
0511-3	musae	Zingiberales	Strelitziaceae	Strelitzia	USNM	60.8	53.6	166.5	100.5	118.2	82.5	297.8	421.1	138.6	57.6	451.3	737.1	85	168.9	126.4	60.6	1826.7	68.9	2.40625	1.63059	3.6097	2.45138	1.33623	1.01441	1.09652	4.33792	0
0511-4	musae	Zingiberales	Strelitziaceae	Strelitzia	USNM	61.3	52.6	175.4	102.1	123.9	84.6	322.6	NA	137.6	NA	479.1	788.8	94.9	190.4	133.6	NA	1959.8	76	NA	1.44995	3.81324	2.50526	1.42515	1.08552	1.02994	NA	0
0512-2	musae	Zingiberales	Strelitziaceae	Strelitzia	USNM	53.7	61.4	156.6	120	112.9	84	307.1	NA	127.1	61.9	456	772	85	170.3	138.4	51.3	1908.1	68.1	2.05331	1.49529	3.65595	2.50073	1.23049	1.08748	0.918353	NA	0
0512-3	musae	Zingiberales	Strelitziaceae	Strelitzia	USNM	71.4	56.4	356.2	0	132	85.9	351.1	447.7	134.7	64.1	565	937.4	93.8	186.2	147.2	53	2194.3	55.8	2.1014	1.43603	4.08731	3.33692	1.26495	0.52274	0.915082	4.90127	1
0514-1	musae	Zingiberales	Strelitziaceae	Strelitzia	USNM	57.7	41.9	228.6	0	102.1	80.4	292.7	368.5	127.4	NA	379.8	632.4	86.1	166.7	132	60.2	1679	66.2	NA	1.47967	3.64055	2.51813	1.26288	0.729221	0.965152	4.55631	1
0514-2	musae	Zingiberales	Strelitziaceae	Strelitzia	USNM	66.5	48.4	188.3	104.4	117	88.9	314.1	450.3	126.6	60	465.1	766.3	91.6	172	137.9	58.4	NA	95.4	2.11	1.3821	3.53318	1.80294	1.24728	0.913436	0.918057	NA	0
0515-1	musae	Zingiberales	Strelitziaceae	Strelitzia	USNM	56.3	49.3	266.7	0	122.7	88.4	365.1	407.1	127.7	61.3	455.6	761.7	90.4	186.4	139	56.9	1633.5	72.6	2.0832	1.41261	4.13009	2.56749	1.34101	0.698913	0.918705	4.01253	1
0653-1	musae					56.3	55.4	262	0	119	79.7	300.1	435.6	123.6	67	428	719.8	88	187.7	139.9	61.3	1906.4	66.2	1.84478	1.40455	3.76537	2.83535	1.34167	0.716412	0.883488	4.37649	1
0732-1	musae	Zingiberales	Musaceae	Musa	NHMUK	62.6	58.1	226.5	153.3	161.4	91.7	346.3	440.9	126.3	67.5	493.2	832	94.7	195.3	138.8	44.3	2138.2	78.1	1.87111	1.33369	3.77644	2.50064	1.40706	0.862252	0.909942	4.84963	0
0732-2	musae	Zingiberales	Musaceae	Musa	NHMUK	54.9	64.9	279.4	177.9	170.4	107.7	383.4	432.8	132.2	NA	495.6	876.9	94	200.9	124.4	37.1	1859.4	81.4	NA	1.40638	3.55989	2.46806	1.61495	0.719041	1.0627	4.29621	0
0733-1	musae	Zingiberales	Musaceae	Musa	NHMUK	55.5	50.8	NA	NA	NA	NA	NA	404.7	138.6	71.1	460.8	807.1	96.6	189.3	132.9	46	1976.2	74	1.94937	1.43478	NA	2.55811	1.42438	NA	1.04289	4.88312	NA
0733-2	musae	Zingiberales	Musaceae	Musa	NHMUK	58.9	65.4	275.9	177.3	172.7	102.1	352.4	446.2	136.4	78.9	509	862.9	92.3	206	145.8	58.6	1933.9	67.2	1.72877	1.47779	3.45152	3.06548	1.41289	0.746647	0.935528	4.33416	0
0733-3	musae	Zingiberales	Musaceae	Musa	NHMUK	69.8	61.9	236.8	160.9	146.9	104.2	NA	475.5	139.4	81.6	610.9	1047.5	99.3	223.7	159.5	53.4	2243.2	99.7	1.70833	1.40383	NA	2.24373	1.40251	0.944679	0.873981	4.71756	0
0734-2	musae	Zingiberales	Musaceae	Musa	NHMUK	58.6	64.9	233.7	158.5	155.9	91.3	NA	434.6	132	77.8	488.6	839.5	98.1	199.6	136.5	39.7	1983.3	55.1	1.69666	1.34557	NA	3.6225	1.46227	0.854086	0.967033	4.56351	0
0734-3	musae	Zingiberales	Musaceae	Musa	NHMUK	71.3	61.8	259.7	163.6	174.9	NA	NA	480.8	131	75.3	576.4	984.4	98.1	211.7	151.7	38.5	2231.4	84.8	1.73971	1.33537	NA	2.49646	1.39552	0.815171	0.863546	4.64101	0
0735-11	musae	Zingiberales	Musaceae	Musa	NHMUK	61.8	70	NA	NA	NA	NA	NA	457.6	136.8	70.6	564.6	904	94.1	201.6	155.1	NA	2130.1	75.8	1.93768	1.45377	NA	2.65963	1.29981	NA	0.882012	4.65494	NA
0735-2	musae	Zingiberales	Musaceae	Musa	NHMUK	67.1	61.1	290.4	202.1	179.1	111.1	398.9	441.9	139.2	NA	543.4	933.5	97.2	208.3	143.4	48.6	2051	66.4	NA	1.4321	3.59046	3.13705	1.45258	0.717287	0.970711	4.64132	0
0736-1	musae	Zingiberales	Musaceae	Musa	NHMUK	70.9	62	237.7	156.2	154.5	106.6	NA	467.8	138.7	78.7	556	976.1	91.5	192.2	148.8	46.1	2474.4	85.7	1.76239	1.51585	NA	2.24271	1.29167	0.808582	0.932124	5.28944	0
0736-2	musae	Zingiberales	Musaceae	Musa	NHMUK	50.2	51.8	229.3	169.8	156.8	103.9	381.5	415.4	122.9	NA	449	779.4	91.5	183.5	127.6	64.6	1633.4	74.4	NA	1.34317	3.6718	2.4664	1.43809	0.800262	0.963166	3.93211	0
0066-1	nigrum	Poales	Poaceae	Zizania	USNM	72.3	68.2	224.2	150.3	118.5	90.9	333.9	NA	125.6	NA	512.8	868.7	96.5	236	161.7	NA	1989.7	98	NA	1.30155	3.67327	2.40816	1.45949	1.05263	0.776747	NA	0
0066-2	nigrum	Poales	Poaceae	Zizania	USNM	61.1	59	322.8	NA	104.7	75.9	293.4	453.3	119.4	95.8	448.5	772.7	95.5	221.9	156.3	NA	2003.8	87.2	1.24635	1.25026	3.86561	2.54472	1.41971	0.687423	0.763916	4.42047	NA
0067-1	nigrum	Poales	Poaceae	Zizania	USNM	68.6	60.7	213.7	129.1	107.2	67.7	293.3	412	126.1	76.8	500.8	809	89	238.7	149.8	NA	2087.8	87.9	1.64193	1.41685	4.33235	2.71559	1.59346	1.11699	0.841789	5.06748	0
0070-1	nigrum	Poales	Poaceae	Zizania	USNM	70.3	49.3	214.9	108	103.2	72	290.7	NA	NA	NA	429.8	741.2	89.2	NA	NA	NA	1851.9	NA	NA	NA	4.0375	NA	NA	NA	NA	NA	0
0072-2	nigrum	Poales	Poaceae	Zizania	USNM	74.8	53.5	189.9	101.2	111.4	72.9	289.8	429	115.2	65.7	418.8	660.5	89	201.2	147.2	46.6	1756	74.5	1.75342	1.29438	3.97531	2.70067	1.36685	1.05951	0.782609	4.09324	0
0086-3	nigrum					71.2	60.5	220.3	144	119.4	81.2	321	426.4	123.9	89.2	484.1	748.5	94.2	240.7	151.9	45.7	2026.6	100.1	1.38901	1.31529	3.9532	2.4046	1.5846	1.0926	0.815668	4.75281	0
0726-1	nigrum	Poales	Poaceae	Zizania	NHMUK	71.4	62.6	274.6	168.8	152.5	88.3	370.5	493.2	127.5	83.2	568.4	919.6	96.8	258.6	173.1	55.1	1996.7	102.1	1.53245	1.31715	4.19592	2.53281	1.49393	0.941733	0.736568	4.04846	0
0783-1	nigrum	Poales	Poaceae	Zizania	CNC	72.6	66.4	284.9	176.3	157.2	94.7	356.7	516.5	128.7	104.2	593.4	985.7	99.9	256.5	198.3	48.9	2434.9	100.7	1.23512	1.28829	3.76663	2.54717	1.29349	0.900316	0.649017	4.71423	0
0785-1	nigrum	Poales	Poaceae	Zizania	CNC	71.2	56.7	238.7	150.4	120.8	70.2	329.3	476.2	126.6	103.8	527.3	861	94.8	235.3	174.6	47.5	2287.6	91.1	1.21965	1.33544	4.69088	2.58288	1.34765	0.985756	0.725086	4.80386	0
0787-1	nigrum	Poales	Poaceae	Zizania	CNC	75.5	53.8	183.6	123.4	112	74.8	337.1	438.5	126.2	83.9	431.5	NA	NA	194.6	148.1	62.2	1851.9	76.9	1.50417	NA	4.50668	2.53056	1.31398	1.05991	0.852127	4.22326	0
0145-1	nymphaeae	Saxifragales	Haloragaceae	Myriophyllum	USNM	86.6	60.5	274.1	208.3	176.5	117.3	412.4	512.2	174.5	78	558.6	962.7	119.8	374.3	163.2	54.3	2052.7	67.9	2.23718	1.45659	3.51577	5.51252	2.2935	1.36556	1.06924	4.00761	0
0145-2	nymphaeae	Saxifragales	Haloragaceae	Myriophyllum	USNM	74.3	69.9	201.7	172.4	155.3	116.5	401.3	457.8	175.4	74.3	469.1	865.3	106.3	286.4	135	52.4	1600.1	54.9	2.3607	1.65005	3.44464	5.21676	2.12148	1.41993	1.29926	3.49519	0
0146-1	nymphaeae	Ceratophyllales	Ceratophyllaceae	Ceratophyllum	USNM	70.4	51.3	268.2	170.5	173.3	108	434.7	436.3	163.1	70.9	481.6	844.4	107.5	341.7	152.5	40.8	1763.4	62.5	2.30042	1.51721	4.025	5.4672	2.24066	1.27405	1.06951	4.04171	0
0146-2	nymphaeae	Ceratophyllales	Ceratophyllaceae	Ceratophyllum	USNM	62.1	55.6	291.5	227.2	192.9	127.6	476.1	NA	184.5	70.8	564.7	1045.3	126.9	390	172.8	NA	1932.6	79.6	2.60593	1.4539	3.73119	4.8995	2.25694	1.33791	1.06771	NA	0
0146-3	nymphaeae	Ceratophyllales	Ceratophyllaceae	Ceratophyllum	USNM	55.7	57	273.3	210.4	182.7	112.4	450.8	NA	170.1	74.3	507.4	883.7	111	381.8	159.1	47.3	1825.2	60.6	2.28937	1.53243	4.01068	6.30033	2.39975	1.397	1.06914	NA	0
0147-1	nymphaeae	Ceratophyllales	Ceratophyllaceae	Ceratophyllum	USNM	54.8	44.7	217.5	159.4	142.1	94.2	343.3	364.7	148.9	62.8	398.8	679.1	96.5	258.8	129.9	NA	1526.2	44.4	2.37102	1.54301	3.64437	5.82883	1.9923	1.18989	1.14627	4.18481	0
0147-2	nymphaeae	Ceratophyllales	Ceratophyllaceae	Ceratophyllum	USNM	66.5	57.1	258.7	185.3	171.6	118	419.3	NA	166.5	70.1	461.3	853.3	111.7	321.4	145.5	49.5	1869.4	41	2.37518	1.4906	3.55339	7.83902	2.20893	1.24237	1.14433	NA	0
0148-1	nymphaeae	Ceratophyllales	Ceratophyllaceae	Ceratophyllum	USNM	74.3	63.1	281.2	235.8	205.4	130	474.7	509.3	175.7	65.5	594.5	1017.7	121.2	385.1	174.2	47.9	2172	77.1	2.68244	1.44967	3.65154	4.99481	2.21068	1.36949	1.00861	4.26468	0
0148-2	nymphaeae	Ceratophyllales	Ceratophyllaceae	Ceratophyllum	USNM	62.3	55.2	324	246.4	209.2	118	473.1	506.5	178	65.3	612.1	1032.5	120	398.9	172.4	42	2216	94.7	2.72588	1.48333	4.00932	4.21225	2.31381	1.23117	1.03248	4.37512	0
0148-3	nymphaeae	Ceratophyllales	Ceratophyllaceae	Ceratophyllum	USNM	78.1	56.5	295.9	212.3	196.8	123.3	433.9	478.3	172.7	64.2	537.7	900.8	114.1	378.8	158.8	52.3	2030.4	69.2	2.69003	1.51358	3.51906	5.47399	2.38539	1.28016	1.08753	4.24503	0
0149-1	nymphaeae	Ceratophyllales	Ceratophyllaceae	Ceratophyllum	USNM	86.8	56.1	283.7	235.6	193.3	122.7	455.5	474.5	181.2	71.7	591.3	1006.7	120.3	389.9	170.1	39.6	2149.2	93.7	2.5272	1.50623	3.71231	4.16115	2.29218	1.37434	1.06526	4.5294	0
0149-2	nymphaeae	Ceratophyllales	Ceratophyllaceae	Ceratophyllum	USNM	72.4	56.3	304	224.1	193.7	126.7	448.5	467	175.2	84.8	556.1	960.2	119.7	355.7	179.3	46.7	2295.2	77.1	2.06604	1.46366	3.53986	4.61349	1.98383	1.17007	0.977133	4.91478	0
0149-3	nymphaeae	Ceratophyllales	Ceratophyllaceae	Ceratophyllum	USNM	68.8	55.6	330.9	233.3	209.5	129.1	459.9	505.9	183.2	81.2	616.7	1047.1	132.4	399.4	174.2	46	2242.2	77.9	2.25616	1.38369	3.56235	5.12709	2.29277	1.20701	1.05166	4.4321	0
0151-1	nymphaeae	Nymphaeales	Nymphaeaceae		USNM	56.1	62.1	271.2	155.9	147.3	93.8	344	448.8	166.6	62.5	470.2	804.8	108.4	341.8	145.4	NA	1892.7	57.7	2.6656	1.5369	3.66738	5.92374	2.35076	1.26032	1.1458	4.21725	0
0152-1	nymphaeae	Alismatales	Hydrocharitaceae	Elodea	USNM	70.7	56.5	278	193.8	174.1	120.2	407.1	514	162.5	85.2	555.7	957.7	123.4	377.3	164.2	NA	1848.4	79.1	1.90728	1.31686	3.38686	4.76991	2.29781	1.35719	0.989647	3.59611	0
0154-1	nymphaeae	Nymphaeales	Nymphaeaceae		USNM	85.1	57.6	334.1	250.3	216.3	124.6	NA	NA	180.4	NA	621.3	1093.6	123.2	402.2	172.1	46	2281.6	72.5	NA	1.46429	NA	5.54759	2.33701	1.20383	1.04823	NA	0
0154-2	nymphaeae	Nymphaeales	Nymphaeaceae		USNM	65.2	62.2	316	222.9	191.5	131.2	401	540.4	181.9	62.9	624.6	1068.7	128.3	356.8	162.2	48.8	2293.5	59.2	2.89189	1.41777	3.0564	6.02703	2.19975	1.12911	1.12145	4.24408	0
0154-3	nymphaeae	Nymphaeales	Nymphaeaceae		USNM	86.1	61.2	345.4	208.5	190.4	129.6	402.9	NA	182.7	NA	591.1	1015.6	124.7	383.7	167.2	51.4	2141.2	77	NA	1.46512	3.1088	4.98312	2.29486	1.11089	1.0927	NA	0
0155-2	nymphaeae	Nymphaeales	Nymphaeaceae	Nuphar	USNM	NA	72.7	290.1	212.4	178	108.4	429.3	NA	NA	NA	625.6	1056.3	125.2	433.8	181.9	NA	2460.4	102.6	NA	NA	3.96033	4.22807	2.38483	1.49535	NA	NA	0
0156-1	nymphaeae	Nymphaeales	Nymphaeaceae	Nuphar	USNM	99.7	68.2	265.6	195.3	198.8	123.2	417.6	584.9	186.2	88.9	621.4	1054.3	121.6	437.8	179.5	58.9	2194.4	102	2.09449	1.53125	3.38961	4.29216	2.439	1.64834	1.03733	3.75175	0
0158-2	nymphaeae				USNM	69.6	58	251.2	195.4	172.2	119	416	483.5	161.2	NA	465.5	838.8	113.3	314	141.3	NA	1829.1	63.5	NA	1.42277	3.4958	4.94488	2.22222	1.25	1.14084	3.78304	0
0159-1	nymphaeae	Nymphaeales	Nymphaeaceae		USNM	61.2	47.5	191.4	119.1	123.3	99.7	333.7	432.6	154.7	64.2	416.5	738.8	109.1	279.3	140.6	45.4	1626.1	58.7	2.40966	1.41797	3.34704	4.75809	1.98649	1.45925	1.10028	3.7589	0
0159-2	nymphaeae	Nymphaeales	Nymphaeaceae		USNM	44.8	38.1	172.4	95	107.2	81.5	267.7	386.8	136.7	51	331.7	584.5	96.6	206.8	124	31.7	1279.9	42.4	2.68039	1.41511	3.28466	4.87736	1.66774	1.19954	1.10242	3.30895	0
0159-3	nymphaeae	Nymphaeales	Nymphaeaceae		USNM	52.6	48.4	195.3	122.7	117.1	83.7	304.4	407.8	144.3	51.4	362.9	641.2	89.8	238.5	128.9	NA	1317.1	39.6	2.80739	1.6069	3.6368	6.02273	1.85027	1.2212	1.11947	3.22977	0
0159-4	nymphaeae	Nymphaeales	Nymphaeaceae		USNM	51.8	41	226.4	149.6	131	101	310.5	442.1	150.6	55.9	NA	NA	NA	276.6	136.5	NA	1349.7	45.9	2.6941	NA	3.07426	6.02614	2.02637	1.22173	1.1033	3.05293	0
0160-2	nymphaeae	Nymphaeales	Nymphaeaceae	Nymphaea	USNM	70.2	55.1	303	211.4	175	115.5	427.3	509.7	179.1	83.3	609.1	1043.4	129.2	408.8	175.5	50.1	2195.4	48.3	2.15006	1.38622	3.69957	8.46377	2.32934	1.34917	1.02051	4.30724	0
0161-1	nymphaeae	Alismatales	Araceae	Dieffenbachia	USNM	64.7	57.1	311.7	221.5	78.9	119.7	390.7	NA	158.6	NA	572.1	NA	NA	378.5	154.2	49.4	1962.3	83.9	NA	NA	3.26399	4.51132	2.4546	1.21431	1.02853	NA	0
0164-1	nymphaeae	Commelinales	Pontederiaceae	Pontederia	USNM	71.4	75.9	313.7	245.2	213.9	137.9	477.9	534.5	179.6	NA	639	1120.3	116.1	451.6	158.9	66.6	2059.4	94.7	NA	1.54694	3.46555	4.76874	2.84204	1.43959	1.13027	3.85295	0
0164-2	nymphaeae	Commelinales	Pontederiaceae	Pontederia	USNM	89	77.4	295.9	217.1	207.8	115.9	455.1	524.9	172.1	NA	612.2	1056.4	111.7	409	174.2	58.6	2003.2	96.7	NA	1.54073	3.92666	4.22958	2.34788	1.38222	0.987945	3.81635	0
0165-4	nymphaeae	Nymphaeales	Nymphaeaceae	Nymphaea	USNM	64	40.5	252	147.3	133.9	89.8	358.6	446.2	151.6	70.4	459.2	775	109.5	288.1	143.1	37.5	1631.5	64.4	2.15341	1.38447	3.99332	4.4736	2.01328	1.14325	1.0594	3.65643	0
0166-1	nymphaeae	Commelinales	Pontederiaceae	Eichhornia	USNM	62.8	47.8	243.9	180.6	161.7	113.7	401.4	468.2	172.2	67.5	468.6	860.1	112.4	320	139	44	1640.7	63.4	2.55111	1.53203	3.53034	5.04732	2.30216	1.31201	1.23885	3.50427	0
0166-2	nymphaeae	Commelinales	Pontederiaceae	Eichhornia	USNM	76.3	61.1	310.5	223.3	199.3	136.3	446.6	490.2	186.4	NA	586.5	1008.4	122.3	385.5	162.2	48.4	1896.8	82.9	NA	1.52412	3.2766	4.65018	2.3767	1.24155	1.1492	3.86944	0
0166-3	nymphaeae	Commelinales	Pontederiaceae	Eichhornia	USNM	83.5	60.2	338.1	223	202	139.1	452.5	508.1	183.2	81.5	598.8	1062.5	131.2	370.6	152	51.1	1969.6	69.6	2.24785	1.39634	3.25306	5.32471	2.43816	1.09613	1.20526	3.8764	0
0166-4	nymphaeae	Commelinales	Pontederiaceae	Eichhornia	USNM	68.5	52.9	257.3	182	173.6	103.7	439.5	457.4	179.5	70.6	495.5	930.9	119.4	327.5	143.8	37.2	1640.9	49.3	2.54249	1.50335	4.23819	6.643	2.27747	1.27283	1.24826	3.58745	0
0166-5	nymphaeae	Commelinales	Pontederiaceae	Eichhornia	USNM	75.3	63.3	288.2	215.6	204	137.9	NA	489.8	185.1	NA	558.8	1014	121.3	336.6	149.7	46.4	1826.3	66.7	NA	1.52597	NA	5.04648	2.2485	1.16794	1.23647	3.72866	0
0166-6	nymphaeae	Commelinales	Pontederiaceae	Eichhornia	USNM	80.2	58	283.5	22.5	192	125.5	436	508.4	179.6	62.2	547.8	975.5	115.8	361.8	152.9	50.4	1756.9	73.9	2.88746	1.55095	3.4741	4.89581	2.36625	1.27619	1.17462	3.45574	0
0166-7	nymphaeae	Commelinales	Pontederiaceae	Eichhornia	USNM	65.1	51.4	253.5	193.4	183.2	116.4	451.3	462.9	174.3	68.1	NA	NA	NA	343.2	141.6	NA	1612.4	62.6	2.55947	NA	3.87715	5.48243	2.42373	1.35385	1.23093	3.48326	0
0168-1	nymphaeae	Nymphaeales	Nymphaeaceae	Nymphaea	USNM	76.9	52.5	223.7	166.3	163	96.3	333.8	489.2	157.7	NA	483.2	835.6	107.8	319.1	168.3	NA	1775.2	68.5	NA	1.46289	3.46625	4.65839	1.89602	1.42646	0.937017	3.62878	0
0169-1	nymphaeae	Alismatales	Alismataceae	Alisma	USNM	77.1	50.2	274.7	196.4	173.7	124.4	431.5	515.7	160.4	91.6	546.9	967.8	111.1	366.6	155.7	NA	1920.1	107.2	1.75109	1.44374	3.46865	3.41978	2.35453	1.33455	1.03019	3.72329	0
0169-2	nymphaeae	Alismatales	Alismataceae	Alisma	USNM	81.7	76	333.2	217.4	213.2	123.2	477.8	588.3	172.7	100.8	633.3	1105.3	114.8	434.1	172.3	NA	2141.5	122.6	1.71329	1.50436	3.87825	3.54078	2.51944	1.30282	1.00232	3.64015	0
0171-4	nymphaeae	Nymphaeales	Nymphaeaceae		USNM	60.8	53.9	258.5	170	170.3	107.5	368.3	494.8	160.1	67.1	495	845	111.5	333.8	147.4	42.7	1949	75.5	2.38599	1.43587	3.42605	4.42119	2.26459	1.2913	1.08616	3.93897	0
0172-3	nymphaeae	Nymphaeales	Nymphaeaceae		USNM	60.1	49.9	244.2	145.1	164.8	99.5	348	456.5	NA	NA	437.1	734.4	103.5	305.3	122.9	54.2	1802.6	68.4	NA	NA	3.49749	4.46345	2.48413	1.2502	NA	3.94874	0
0172-4	nymphaeae	Nymphaeales	Nymphaeaceae		USNM	79	57.6	295.5	173.8	164.3	103.1	342.1	513.8	157.4	NA	512.5	875.7	108.7	347.5	151	NA	1952.6	62.6	NA	1.44802	3.31814	NA	NA	1.17597	1.04238	3.80031	0
0175-2	nymphaeae	Alismatales	Araceae		USNM	71.7	51.9	216.4	152.4	129.8	91.2	314.5	428.8	149	62.5	434.7	737.1	99.3	311.2	142.8	NA	1705.8	NA	2.384	1.5005	3.44846	NA	2.17927	1.43808	1.04342	3.97808	0
0175-3	nymphaeae	Alismatales	Araceae		USNM	73.6	62.6	259.5	190.8	170.3	109.7	347.7	480.6	169.6	NA	NA	NA	NA	NA	158.5	NA	2017	58.8	NA	NA	3.16955	NA	NA	NA	1.07003	4.19684	0
0175-4	nymphaeae	Alismatales	Araceae		USNM	77.5	59.1	253.4	168.2	153.2	98.3	346.5	NA	165.3	61.6	480.8	NA	NA	319.7	NA	NA	1700	54.7	2.68344	NA	3.52492	5.84461	NA	1.26164	NA	NA	0
0175-5	nymphaeae	Alismatales	Araceae		USNM	63.9	57.6	246.2	172.4	145.4	98.8	334.5	467.3	159.3	68.1	498.8	NA	NA	345.3	151.7	NA	1815.5	75.7	2.33921	NA	3.38563	4.56143	2.2762	1.40252	1.0501	3.88508	0
0175-6	nymphaeae	Alismatales	Araceae		USNM	69.3	51.8	250.8	170.4	162.1	114.1	345.1	NA	162.5	66.1	484.4	835.5	111.3	350.2	153.7	NA	NA	69	2.4584	1.46002	3.02454	5.07536	2.27846	1.39633	1.05725	NA	0
0176-1	nymphaeae	Nymphaeales	Nymphaeaceae		USNM	81.6	58.7	263.5	204.3	199.1	128.1	484.5	502.3	NA	NA	574.4	1042.7	118.8	391.8	161.5	NA	1653.9	72.4	NA	NA	3.7822	5.4116	2.42601	1.48691	NA	3.29265	0
0176-2	nymphaeae	Nymphaeales	Nymphaeaceae		USNM	73.4	57.5	247.7	186	160.7	126.4	427.4	499	180.2	NA	340	954.1	120.1	319	165.3	66.6	1823.2	67.2	NA	1.50042	3.38133	4.74702	1.92982	1.28785	1.09014	3.65371	0
0176-3	nymphaeae	Nymphaeales	Nymphaeaceae		USNM	78.1	60	283	211.3	197.9	134.5	467.7	505.6	174.2	79.9	570.9	1029.3	121.7	408.6	167.2	NA	1886.1	77.2	2.18023	1.43139	3.47732	5.29275	2.44378	1.44382	1.04187	3.73042	0
0177-1	nymphaeae	Nymphaeales	Nymphaeaceae		USNM	99.1	61.7	290.9	216	203.3	116.1	434.5	528	188.9	77	632.9	1106.5	125.4	398.2	181	50.1	2281.1	61.2	2.45325	1.50638	3.74246	6.50654	2.2	1.36886	1.04365	4.32027	0
0177-2	nymphaeae	Nymphaeales	Nymphaeaceae		USNM	67.3	68.1	304.4	233.1	190.7	122.8	425	512	172.9	63.8	590.4	1052.1	117.5	384.1	175.7	NA	2066.4	64.4	2.71003	1.47149	3.46091	5.96429	2.18611	1.26183	0.984064	4.03594	0
0178-1	nymphaeae	Alismatales	Araceae	Lemna	USNM	53.9	33.7	179.3	122.5	115.4	82.4	271.9	NA	132.7	82.5	325.9	575.2	93.8	221.4	103.3	NA	1334.7	51	1.60848	1.41471	3.29976	4.34118	2.14327	1.2348	1.28461	NA	0
0181-1	nymphaeae	Alismatales	Araceae	Lemna	USNM	64.3	49.6	236.4	139	131.8	101.4	340.9	NA	142	NA	428.6	740.6	105.3	306.2	131.2	NA	1704.1	81.6	NA	1.34853	3.36193	3.75245	2.33384	1.29526	1.08232	NA	0
0190-3	nymphaeae	Alismatales	Araceae	Pistia	USNM	51.7	45.1	241.9	156.5	144.4	94.5	364.6	423	146.4	59	419.9	719.8	98.1	320.7	125.5	NA	1610.8	50.4	2.48136	1.49235	3.8582	6.3631	2.55538	1.32575	1.16653	3.80804	0
0190-4	nymphaeae	Alismatales	Araceae	Pistia	USNM	63.5	48.8	243.5	155.1	124.4	97.2	353.5	408.4	148.7	NA	415.4	699.1	104.9	275.2	119.1	28.7	1580.7	42.5	NA	1.41754	3.63683	6.47529	2.31066	1.13018	1.24853	3.87047	0
0191-2	nymphaeae	Commelinales	Pontederiaceae	Reussia	USNM	74.1	52.9	279.5	180.6	173.5	118.7	397.5	468.3	163.8	58.3	491.4	889.7	106.4	348.8	134.4	NA	1744.5	62	2.80961	1.53947	3.34878	5.62581	2.59524	1.24794	1.21875	3.72518	0
0064-1	padi	Poales	Poaceae		USNM	76.2	64.9	330.3	208.8	NA	NA	NA	416.4	110	54	527	870.2	82.1	277.6	NA	40.5	1835.3	65.1	2.03704	1.33983	NA	4.26421	NA	0.840448	NA	4.40754	0
0064-2	padi	Poales	Poaceae		USNM	82.8	73	303.7	199.8	156.9	99	441.7	419.3	116.6	57	527.8	858.4	97	266.1	NA	43.4	1911.8	58.2	2.04561	1.20206	4.46162	4.57216	NA	0.876194	NA	4.5595	0
0278-2	padi	Poales	Poaceae	Zea	USNM	76.8	63.5	326.3	183.9	175.9	102.3	496.1	467	117.6	73.3	557.7	1000	84	279.1	161.1	NA	NA	108.4	1.60437	1.4	4.84946	2.57472	1.73246	0.855348	0.729981	NA	0
0278-3	padi	Poales	Poaceae	Zea	USNM	78.4	79	315.1	209.8	179.3	105.7	479.2	NA	118.5	80.9	NA	NA	NA	304	164.7	NA	2068.6	99	1.46477	NA	4.53359	3.07071	1.84578	0.964773	0.71949	NA	0
0280-2	padi	Poales	Poaceae	Zea	USNM	87	76.1	475.8	291.2	222.1	117	513.7	527.6	121	86.1	719.2	1250.8	110.1	293.1	182.9	40.5	2520.4	101.3	1.40534	1.099	4.3906	2.89339	1.60252	0.616015	0.661564	4.7771	0
0281-1	padi	Poales	Poaceae	Zea	USNM	72.7	61.2	348.6	209.3	185.5	96	464.7	456	108.4	62.1	539.9	925.9	NA	285.2	174.7	42.3	2013.2	75.2	1.74557	NA	4.84063	3.79255	1.63251	0.81813	0.620492	4.41491	0
0285-2	padi	Poales	Poaceae	Elymus	USNM	56.8	54	296.5	193.2	141.3	88.4	390.2	NA	97.6	67.1	NA	NA	NA	252.2	146.3	28	1770.4	61.1	1.45455	NA	4.41403	4.12766	1.72386	0.85059	0.667122	NA	0
0287-3	padi	Poales	Poaceae	Hordeum	USNM	77.8	62.8	345.4	200.1	183.8	91.4	504.2	462.5	116.3	62.6	556.7	987.5	89.6	273.1	165.3	52.3	2068.4	83.3	1.85783	1.29799	5.51641	3.27851	1.65215	0.790677	0.703569	4.47222	0
0291-2	padi	Poales	Poaceae	Bromus	USNM	55.8	47	286.1	170.1	149.9	76.5	399.2	404.5	98.8	67.8	412.9	730.1	90.3	238.1	136.3	NA	1582.7	81.1	1.45723	1.09413	5.2183	2.93588	1.74688	0.832226	0.724872	3.91273	0
0291-3	padi	Poales	Poaceae	Bromus	USNM	52.3	50.6	300	168.5	149.5	82.6	435	411.2	104.9	69.6	427.4	734.8	74	248.5	144.5	NA	NA	80.7	1.50718	1.41757	5.26634	3.07931	1.71972	0.828333	0.725952	NA	0
0292-2	padi	Poales	Poaceae	Bromus	USNM	60.1	42.2	296.6	163.9	133.2	79.8	421.8	375.2	95.6	61.4	416.7	684.4	74.2	237.1	142.3	35.3	1758.2	75.2	1.557	1.28841	5.28571	3.15293	1.6662	0.799393	0.67182	4.68603	0
0293-2	padi	Poales	Poaceae	Bromus	USNM	62.5	44.3	321.7	177.8	138.5	80.7	427.7	420.4	99.9	NA	433.5	740.9	75.1	263.1	155.7	NA	1780.8	86.5	NA	1.33023	5.29988	3.04162	1.68979	0.817843	0.641618	4.23597	0
0295-1	padi	Poales	Poaceae	Triticum	USNM	76.8	NA	NA	NA	NA	NA	NA	490.1	114.1	86.7	535	NA	NA	272	174.9	NA	2079.3	110.4	1.31603	NA	NA	2.46377	1.55517	NA	0.652373	4.2426	NA
0295-3	padi	Poales	Poaceae	Triticum	USNM	68.4	62.8	380.5	240.9	183.2	86.7	NA	494.8	122.1	68.2	581.7	960.9	85.4	287.7	191.4	38.7	2223.5	90	1.79032	1.42974	NA	3.19667	1.50313	0.75611	0.637931	4.49373	0
0295-4	padi	Poales	Poaceae	Triticum	USNM	95.7	NA	NA	NA	NA	NA	NA	496.5	112.3	68.5	586.8	987.9	88.7	300	NA	NA	2214.2	102.8	1.63942	1.26607	NA	2.91829	NA	NA	NA	4.45962	NA
0298-1	padi	Poales	Poaceae	Triticum	USNM	71.9	71.6	367.2	225.8	192.2	97.5	448.9	480	115	74.4	488.5	972.3	83.9	324.3	148	NA	2059.1	62.6	1.5457	1.37068	4.6041	5.18051	2.19122	0.88317	0.777027	4.28979	0
0299-2	padi	Poales	Poaceae	Triticum	USNM	68.7	50.9	352.1	193.6	165.2	97.6	448.1	428.1	110.4	60	473.2	741.8	68.8	264	144.6	26.8	1825.3	51.8	1.84	1.60465	4.59119	5.09653	1.82573	0.749787	0.763485	4.26372	0
0301-1	padi	Poales	Poaceae	Triticum	USNM	61.6	61.1	324.6	210.5	176.2	114.3	385.3	453.5	112.9	56.6	474.4	838	80.3	255.8	146.3	23.1	1803	71.1	1.9947	1.40598	3.37095	3.59775	1.74846	0.788047	0.771702	3.97574	0
0301-3	padi	Poales	Poaceae	Triticum	USNM	58.4	54.1	328.3	201.1	177.1	116.5	357.8	473	105.5	58.3	495.2	858.9	79	277.1	140.6	34	1940.5	62.1	1.80961	1.33544	3.07124	4.46216	1.97084	0.844045	0.750356	4.10254	0
0304-1	padi	Poales	Poaceae	Triticum	USNM	71.2	64.1	359.6	234.8	195.4	97.8	NA	501.3	112.2	86.1	603.2	992.3	72	316.5	168.5	NA	2324	93.4	1.30314	1.55833	NA	3.38865	1.87834	0.880145	0.665875	4.63595	0
0304-2	padi	Poales	Poaceae	Triticum	USNM	65.2	60.7	374.4	208.9	171.8	114.4	371.3	474	116	60.4	505.5	876.6	84.3	268.2	149.6	29	2039.2	78.4	1.92053	1.37604	3.24563	3.42092	1.79278	0.716346	0.775401	4.30211	0
0305-1	padi	Poales	Poaceae	Poa	USNM	65.2	49.9	331.6	168.5	140.2	95.4	433	399.1	98.5	70.7	448.3	703.2	77.4	258.5	138.7	23.2	1563.6	57.7	1.39321	1.27261	4.53878	4.48007	1.86373	0.779554	0.710166	3.91782	0
0305-3	padi	Poales	Poaceae	Poa	USNM	54.2	59.9	243.2	138.3	125.8	74.2	399	330.4	94.6	NA	338	572	66.6	212.1	102.6	NA	1414.3	57.6	NA	1.42042	5.37736	3.68229	2.06725	0.872122	0.922027	4.28057	0
0306-1	padi	Poales	Poaceae	Poa	USNM	50.1	49.5	258.1	135.8	133.6	79	380.1	358.5	100.5	51.1	339.9	567.2	64.7	200	101	15	1344.1	49.9	1.96673	1.55332	4.81139	4.00802	1.9802	0.774893	0.99505	3.74923	0
0306-4	padi	Poales	Poaceae	Poa	USNM	51.2	44.6	232.9	118.7	123.7	73	362.7	371.3	100.1	54.8	333.5	576.2	61.4	216.6	101.2	26.2	1279.2	64.6	1.82664	1.63029	4.96849	3.35294	2.14032	0.930013	0.98913	3.44519	0
0306-6	padi	Poales	Poaceae	Poa	USNM	53.5	47.2	255.9	135.3	125.9	81.3	373.8	NA	98.4	54.2	347.1	580.2	62	200.8	103.1	21.4	1413.7	33.8	1.8155	1.5871	4.59779	5.94083	1.94762	0.784682	0.954413	NA	0
0307-2	padi	Poales	Poaceae	Cynodon	USNM	45.6	42.6	227.9	104.5	98.9	71.9	325.9	356.2	88	51.2	299.9	500	66.4	170	102.9	NA	1193.8	62.1	1.71875	1.3253	4.53268	2.73752	1.65209	0.745941	0.855199	3.35149	0
0307-4	maidis	Poales	Poaceae	Cynodon	USNM	43.6	42.4	140.5	76.8	80	73.7	152.2	399.5	72.7	48.5	317.6	497.8	71.9	132.2	98.9	45	1469.4	28.9	1.49897	1.01113	2.06513	4.57439	1.3367	0.940925	0.735086	3.6781	0
0308-2	padi	Poales	Poaceae	Taeniatherum	USNM	64.3	60.5	310.8	175.8	158.3	95.9	433.3	454.1	110.4	74.1	475	796.3	85.1	257.6	167.5	30.7	1761	97.5	1.48988	1.2973	4.51825	2.64205	1.53791	0.828829	0.659104	3.878	0
0309-2	padi	Poales	Poaceae		USNM	63.2	56.3	305.9	167.8	164.5	90.8	432.2	413.5	109.7	60.9	427	749	80.9	239.1	135.5	30.6	1548.7	84.4	1.80131	1.356	4.75991	2.83294	1.76458	0.781628	0.809594	3.74534	0
0313-1	padi	Poales	Bromeliaceae		USNM	59.8	46	229.7	119.3	106.2	71.2	345.5	418.2	100.1	78.2	358.6	590	67.1	242.3	123	NA	1588.4	81.5	1.28005	1.4918	4.85253	2.97301	1.96992	1.05485	0.813821	3.79818	0
0314-1	padi	Poales	Bromeliaceae		USNM	52.9	43.9	212.4	123	128.4	79.9	341.3	354.2	93.2	45.9	298.5	511.5	64.3	196	93.2	NA	1126.4	47.7	2.0305	1.44946	4.27159	4.10901	2.103	0.922787	1	3.18012	0
0314-2	padi	Poales	Bromeliaceae		USNM	51.9	46.2	199.4	126.4	119.1	80.3	378.9	352.4	94.8	44.5	294.4	513.9	61.6	197.6	86.6	17.4	1013.3	49.1	2.13034	1.53896	4.71856	4.02444	2.28176	0.990973	1.09469	2.87543	0
0317-2	padi	Poales	Typhaceae	Typha	USNM	66.9	62.8	320.7	220.8	157.3	96.4	194.7	430.9	119.4	79.6	499.1	845.6	84	269.6	152.3	NA	1398.8	86.4	1.5	1.42143	2.01971	3.12037	1.77019	0.840661	0.783979	3.24623	0
0317-3	padi	Poales	Typhaceae	Typha	USNM	73	55.8	333.2	206.6	169	83.1	NA	464.5	118.6	73.4	532.2	878.5	82	281.2	158.6	45.6	1972.7	85.6	1.6158	1.44634	NA	3.28505	1.77301	0.843938	0.747793	4.24693	0
0318-1	padi	Nymphaeales	Nymphaeaceae		USNM	64.3	58.4	308.8	157.9	158.5	90.2	455.5	413	107.6	NA	484.5	789.1	76.3	277.9	145.1	29.6	1742.1	91.2	NA	1.41022	5.04989	3.04715	1.91523	0.899935	0.741558	4.21816	0
0318-2	padi	Nymphaeales	Nymphaeaceae		USNM	75.3	54.6	348.6	180	160	88.4	465.3	445.6	119.5	NA	525.5	826.9	79.9	301.9	141.6	33.5	1837.5	89.2	NA	1.49562	5.26357	3.38453	2.13206	0.866036	0.843927	4.12365	0
0319-1	padi	Nymphaeales	Nymphaeaceae	Nuphar	USNM	65.8	46.9	266.3	147.4	129	70.8	407.6	386.5	97.6	52.6	282.1	649.1	80.5	203.7	NA	20.9	1442.6	65	1.85551	1.21242	5.75706	3.13385	NA	0.764927	NA	3.73247	0
0319-2	padi	Nymphaeales	Nymphaeaceae	Nuphar	USNM	47	55.6	269.5	141.8	136.6	76	400.8	391.8	98.7	53.9	378.4	648.7	73.6	194.9	120.8	21.5	1477	53.5	1.83117	1.34103	5.27368	3.64299	1.61341	0.723191	0.817053	3.76978	0
0320-1	padi	Poales	Cyperaceae	Carex	USNM	61.8	49.1	252.4	138.8	129.7	75.7	418.6	386.4	98.4	69.8	380	611.8	65.8	227.6	117.3	23.8	1730.3	83.2	1.40974	1.49544	5.52972	2.73558	1.94032	0.901743	0.838875	4.478	0
0328-1	padi	Asparagales	Iridaceae	Iris	USNM	58.1	45.3	307.6	161.6	136.8	76.5	378.9	393.2	93.1	55	375.6	705.8	72.5	165.6	102.7	21.8	1515.9	32.9	1.69273	1.28414	4.95294	5.03343	1.61246	0.538362	0.906524	3.85529	0
0328-2	padi	Asparagales	Iridaceae	Iris	USNM	57.1	43.9	336.8	179.5	159.5	85.5	368.5	410.1	94.9	48	391.1	713.4	73.2	185.1	105.9	20.9	1620.5	52.4	1.97708	1.29645	4.30994	3.53244	1.74788	0.549584	0.896128	3.95148	0
0330-1	padi	Polytrichales	Polytrichaceae	Polytrichum	USNM	72.3	65.2	332.7	194.6	166.5	89.7	421.4	484.4	111.1	84.7	499.6	829.8	70.7	283.6	149.4	NA	1910.2	100.1	1.31169	1.57143	4.69788	2.83317	1.89826	0.85242	0.743641	3.94344	0
0332-2	padi	Asterales	Asteraceae	Helianthus	USNM	74.8	54.2	319.9	180.1	162.5	84	467.6	438.9	110.6	54.1	510.3	891.6	82.7	289.5	148.5	35	1662.1	65	2.04436	1.33736	5.56667	4.45385	1.94949	0.90497	0.744781	3.78697	0
0334-1	padi	Apiales	Apiaceae	Daucus	USNM	67.9	45.2	448	254.6	195.2	96.2	543.8	NA	115.5	NA	586.4	1118.7	91.1	264.7	144.4	NA	2130.1	81.5	NA	1.26784	5.65281	3.24785	1.8331	0.590848	0.799861	NA	0
0334-2	padi	Apiales	Apiaceae	Daucus	USNM	NA	56.3	437.9	260.6	228.3	100.5	557.1	NA	115.1	44	568.6	1115.4	97.1	234	131.6	32.5	1896.8	47.7	2.61591	1.18538	5.54328	4.90566	1.77812	0.534369	0.87462	NA	0
0334-3	padi	Apiales	Apiaceae	Daucus	USNM	51.1	47.9	305.7	146.6	131	69.4	225.6	369.2	81.9	NA	426.2	751.2	77.5	130.6	NA	NA	1442.9	23.3	NA	1.05677	3.25072	5.60515	NA	0.427216	NA	3.90818	0
0336-1	padi	Asterales	Asteraceae	Lactuca	USNM	58.9	47.1	380.5	214.9	166	87.1	431.9	417.4	103.3	60.4	446.1	820.1	77.5	236.9	138.2	NA	2023.3	57.2	1.71026	1.3329	4.95867	4.14161	1.71418	0.622602	0.747467	4.84739	0
0337-1	padi	Poales	Bromeliaceae	Guzmania	USNM	54.9	50.7	207.8	94.9	103.8	73.3	323.2	346	97	75.7	301.5	547.3	66.3	202.7	108.4	26.5	1316.3	70.1	1.28137	1.46305	4.40928	2.89158	1.86993	0.975457	0.894834	3.80434	0
0338-2	padi	Sonales	Solanaceae	Nicotiana	USNM	59.9	49.7	300.7	166.9	141.8	81.3	397	402.1	104.2	54.7	459.5	747.4	77.2	252	141.7	26.4	1700.5	83.1	1.90494	1.34974	4.88315	3.03249	1.77841	0.838045	0.735356	4.22905	0
0338-3	padi	Sonales	Solanaceae	Nicotiana	USNM	60.6	46.3	279	144.3	141.5	83.5	380.7	394.2	101.7	57.5	405.3	664.7	68.3	249.3	122.1	19.8	1614.2	79.6	1.7687	1.48902	4.55928	3.13191	2.04177	0.893548	0.832924	4.09488	0
0508-1	padi					67.5	49.9	261.1	143.4	128.8	84.9	401.4	367.6	97.5	49.4	376.9	626.6	70.2	244	NA	21.5	1501.9	63.9	1.97368	1.38889	4.72792	3.81847	NA	0.934508	NA	4.08569	0
0724-1	padiformis	Poales	Poaceae	"grass"	NHMUK	75	75.1	233.5	130.7	128	86.5	387.4	507.3	144.9		599.6	973.1	90.3	301.9	156.5	59.7	2591.8	139.9	NA	1.60465	4.47861	2.15797	1.92907	1.29293	0.925879	5.10901	0
0819-1	padiformis	Poales	Poaceae	Poa	CNC	62.3	66.4	197.5	124.9	119.5	83.4	361.7	433.4	130.4	NA	465.3	748.6	78.1	253.4	142	68.1	1810.8	103.9	NA	1.66965	4.33693	2.43888	1.78451	1.28304	0.91831	4.17813	0
0820-1	padiformis	Poales	Poaceae	Poa	CNC	63.7	61.7	202.2	113.3	109	78.7	336.7	458	123.7	85.9	457	740.6	80.1	246.7	132.1	72.1	1689.4	110.1	1.44005	1.54432	4.27827	2.24069	1.86752	1.22008	0.936412	3.68865	0
0821-1	padiformis	Poales	Poaceae	Poa	CNC	71.9	69.8	226.1	131.6	118.8	81	378.8	456.7	137.5	82	485.4	827.6	90.7	260.2	124.9	64.9	2053.6	102.2	1.67683	1.51599	4.67654	2.54599	2.08327	1.15082	1.10088	4.49661	0
0005-1	parvae	Poales	Cyperaceae	Carex	USNM	51.6	45.4	158.5	0	83.1	61.7	208.2	373.9	115.9	53.6	348.1	516.1	85.7	125.3	91.8	NA	1436.5	40.7	2.16231	1.35239	3.37439	3.07862	1.36492	0.790536	1.26253	3.84194	1
0005-2	parvae	Poales	Cyperaceae	Carex	USNM	71.4	52.2	201.5	0	82.4	66.8	236.8	404.2	137.9	64.8	439.2	618.3	90.4	154	100.2	NA	1410.2	73.9	2.12809	1.52544	3.54491	2.0839	1.53693	0.764268	1.37625	3.48887	1
0006-1	parvae	Poales	Cyperaceae	Carex	USNM	75.3	62.3	239.2	0	101.3	65.7	247.9	412.8	NA	NA	463.7	658.3	91	172.4	103.1	NA	1437	84.8	NA	NA	3.77321	2.03302	1.67216	0.720736	NA	3.4811	1
0420-1	rufiabdominale				USNM	56.3	53.7	190.3	0	70.3	61.9	NA	NA	130.4	78.7	NA	NA	NA	227.3	114.4	108.5	1876.2	83.1	1.65693	NA	NA	2.73526	1.98689	1.19443	1.13986	NA	1
0420-3	rufiabdominale				USNM	49.7	58.4	189.6	0	71.4	56.3	319.4	387.3	130.6	76.2	367.1	601.7	76.8	235.3	NA	78.7	1878.5	85	1.71391	1.70052	5.67318	2.76824	NA	1.24103	NA	4.85025	1
0422-2	rufiabdominale	Poales	Poaceae	"rice"	USNM	68.5	46.2	194	0	76.6	62.1	364.2	NA	137.1	66.6	438.3	682.5	79.3	272.7	110.1	NA	1615	96.7	2.05856	1.72888	5.86473	2.82006	2.47684	1.40567	1.24523	NA	1
0424-2	rufiabdominale	Poales	Poaceae	"rice"	USNM	61.4	49.4	209.3	0	77.2	59.4	370.6	422.4	137.5	68.3	429.5	667.1	70.8	248.1	116.7	94.5	NA	101.7	2.01318	1.94209	6.23906	2.43953	2.12596	1.18538	1.17823	NA	1
0425-3	rufiabdominale	Poales	Poaceae	Triticum	USNM	49.4	47.9	144.6	0	61.3	53.1	NA	351.5	115.6	53.3	281.4	494.2	63.6	184.3	92.6	113.5	NA	76.8	2.16886	1.81761	NA	2.39974	1.99028	1.27455	1.24838	NA	1
0429-1	rufiabdominale	Poales	Poaceae	Triticum	USNM	54.7	59.8	239.8	NA	98.7	77.7	346.7	452.3	123.9	59.4	388	647.2	83.2	189.4	140.3	90.4	1733	84.6	2.08586	1.48918	4.46203	2.23877	1.34996	0.789825	0.883108	3.83153	NA
0430-1	rufiabdominale	Poales	Poaceae	"rice"	USNM	65.1	52.5	216	0	79.1	66.7	NA	440.7	139.8	60.2	NA	NA	NA	247	119.4	NA	1845.2	108.4	2.32226	NA	NA	2.2786	2.06868	1.14352	1.17085	4.18698	1
0430-2	rufiabdominale	Poales	Poaceae	"rice"	USNM	62.7	45.1	216.4	0	80.2	67.2	342.4	415.5	145	68.9	453.2	NA	NA	NA	118.6	100.8	1767.5	NA	2.1045	NA	5.09524	NA	NA	NA	1.2226	4.25391	1
0430-3	rufiabdominale	Poales	Poaceae	"rice"	USNM	69	54.3	NA	NA	NA	NA	NA	433.2	151	69.5	485	779	82	256.9	119.7	NA	1984.7	114.9	2.17266	1.84146	NA	2.23586	2.1462	NA	1.26149	4.58149	NA
0431-1	rufiabdominale	Sonales	Solanaceae	Solanum	USNM	65.5	62.7	274.8	0	91.8	78.1	442.4	469.6	157	91.4	502.3	776.5	88.6	276.9	129.4	105.1	2085.5	99.3	1.71772	1.77201	5.66453	2.78852	2.13988	1.00764	1.21329	4.44101	1
0433-2	rufiabdominale	Lilales	Liliaceae	Tulipa	USNM	62.6	54.3	244.8	0	92.2	75.1	363.3	446.6	150.6	67.6	452.8	712.7	84	242.1	134.9	103.4	1962.3	95.8	2.22781	1.79286	4.83755	2.52714	1.79466	0.988971	1.11638	4.39386	1
0434-1	rufiabdominale	Poales	Poaceae	Triticum	USNM	59.2	57.4	234	0	100.3	71.3	401.4	450.5	143.5	90.6	439.6	700.7	86.6	258.3	124.2	NA	2087.3	113.1	1.58389	1.65704	5.62973	2.28382	2.07971	1.10385	1.15539	4.6333	1
0435-2	rufiabdominale	Poales	Poaceae	Triticum	USNM	73.1	59.6	209.7	95.9	106.8	80.1	428.8	451.8	145.8	78.5	537.1	862.9	89.8	266.9	133.7	105.3	1946.9	116.3	1.85732	1.62361	5.35331	2.29493	1.99626	1.27277	1.0905	4.30921	0
0435-3	rufiabdominale	Poales	Poaceae	Triticum	USNM	59.9	54.1	240.2	0	109.1	73.3	408.2	455.4	138.3	85	470.4	776.3	82.5	276.8	118.2	109.4	2037.2	109.7	1.62706	1.67636	5.56889	2.52325	2.34179	1.15237	1.17005	4.47343	1
0446-1	rufiabdominale	Poales	Poaceae	Hordeum	USNM	62	55.9	166.6	81.7	98.2	72.6	373.6	478	136	93.7	NA	NA	NA	263.1	125.9	NA	1759.3	110.2	1.45144	NA	5.14601	2.38748	2.08975	1.57923	1.08022	3.68054	0
0447-1	rufiabdominale	Poales	Poaceae	Triticum	USNM	61.2	53.2	210.1	0	87.7	73.4	368.2	497.1	138.9	103.1	425.2	711.1	75.3	249.4	128.3	NA	NA	108.1	1.34724	1.84462	5.01635	2.30712	1.94388	1.18705	1.08262	NA	1
0448-2	rufiabdominale	Poales	Cyperaceae	Cyperus	USNM	63.2	61.2	222.1	0	75.1	67.8	385.2	425.4	133.7	98.1	392.1	645.2	75.9	232.2	NA	88.3	1741.7	101.1	1.3629	1.76153	5.68142	2.29674	NA	1.04548	NA	4.09426	1
0449-1	rufiabdominale	Poales	Poaceae	Hordeum	USNM	67.6	69	168.8	101.2	108.4	77.9	NA	491.4	144.5	91.7	NA	NA	NA	251.4	133.8	NA	2133.4	105.9	1.57579	NA	NA	2.37394	1.87892	1.48934	1.07997	4.34147	0
0449-2	rufiabdominale	Poales	Poaceae	Hordeum	USNM	62.5	64.7	NA	NA	NA	NA	NA	433.6	136.9	83.3	381.2	648.4	76.3	206	119.5	99.8	2002.4	75.4	1.64346	1.79423	NA	2.7321	1.72385	NA	1.14561	4.61808	NA
0450-3	rufiabdominale	Cucurbitales	Cucurbitaceae	Lagenaria	USNM	72.4	63.5	239.4	136.4	111.7	81.4	425.8	465.8	149.2	78.8	519.2	801.1	88.4	277.7	115.9	101.1	2417.5	93.9	1.8934	1.68778	5.23096	2.9574	2.39603	1.15998	1.28732	5.19	0
0450-4	rufiabdominale	Cucurbitales	Cucurbitaceae	Lagenaria	USNM	70	61.3	333.7	0	116.8	82	432	494.6	151.9	73	504.8	800.8	87.1	261.1	NA	99.7	2329.1	98	2.08082	1.74397	5.26829	2.66429	NA	0.782439	NA	4.70906	1
0451-1	rufiabdominale	Arecales	Arecaceae	Elaeis	USNM	63.9	59.2	210.9	0	75.6	65.3	364.5	NA	151.3	83.2	407	675.9	79	237.7	128.3	113.5	1860.3	107.9	1.81851	1.91519	5.58193	2.20297	1.85269	1.12707	1.17927	NA	1
0451-2	rufiabdominale	Arecales	Arecaceae	Elaeis	USNM	64.9	54.2	213.9	0	79.4	70.6	359.4	NA	148.3	NA	407.7	640.8	71.5	244	117.8	118.3	1658.5	104.5	NA	2.07413	5.09065	2.33493	2.07131	1.14072	1.25891	NA	1
0456-1	rufiabdominale	Gentianales	Rubiaceae	Gardenia	USNM	50.3	49.6	184.1	0	80.8	67.6	347.7	378.9	129.7	54.4	364.7	631.5	75.6	221.7	NA	89.1	1430.5	86.8	2.38419	1.71561	5.14349	2.55415	NA	1.20424	NA	3.7754	1
0037-1	rufulum	Acorales	Acoraceae	Acorus	INHS	73.4	64.1	283.3	0	104.3	91	267.5	418.6	130.1	63.2	479.8	742	100.7	185.1	128.7	80.1	1923.5	83.1	2.05854	1.29196	2.93956	2.22744	1.43823	0.653371	1.01088	4.59508	1
0037-2	rufulum	Acorales	Acoraceae	Acorus	INHS	72.1	61.2	174.6	103.5	101.9	82.1	279.7	401	130.6	66.6	459.2	694.9	96.6	178.2	109.7	56.5	2021.9	71.2	1.96096	1.35197	3.40682	2.50281	1.62443	1.02062	1.19052	5.04214	0
0037-3	rufulum	Acorales	Acoraceae	Acorus	INHS	72.6	86.9	NA	NA	NA	NA	NA	451	134.3	66.9	557.6	836.9	102.4	223.4	131.6	68.2	2186	89.5	2.00747	1.31152	NA	2.49609	1.69757	NA	1.02052	4.84701	NA
0037-5	rufulum	Acorales	Acoraceae	Acorus	INHS	57.5	48.2	193.5	0	66.9	88.3	214.1	396.5	121.6	69.4	381	564.1	76.2	155.6	94.9	81.5	1829	69.4	1.75216	1.5958	2.42469	2.24207	1.63962	0.804134	1.28135	4.61286	1
0037-6	rufulum	Acorales	Acoraceae	Acorus	INHS	63.5	65.8	292.6	0	120	84.6	271.3	435.6	125.1	68.9	472.3	746.9	91.7	169.5	114.8	77.7	1933.5	80	1.81567	1.36423	3.20686	2.11875	1.47648	0.579289	1.08972	4.43871	1
0573-1	rufulum	Acorales	Acoraceae	Acorus	USNM	52.5	63	234.6	0	100.6	80.3	277.2	427.7	129.9	66.3	NA	NA	NA	182.6	NA	80.2	1899.9	64.7	1.95928	NA	3.45205	2.82226	NA	0.778346	NA	4.44213	1
0573-2	rufulum	Acorales	Acoraceae	Acorus	USNM	60.7	67.1	186.3	105.5	115.9	84.5	285.1	420.9	126	82.6	448.6	671.4	90.5	193.3	114.6	85.5	1939.5	69.2	1.52542	1.39227	3.37396	2.79335	1.68674	1.03757	1.09948	4.60798	0
0573-3	rufulum	Acorales	Acoraceae	Acorus	USNM	68.7	62.5	193.8	100.1	106.8	83.5	283	452.9	NA	NA	488.3	737	87.8	194.2	123	NA	1881.6	82.2	NA	NA	3.38922	2.36253	1.57886	1.00206	NA	4.15456	0
0638-1	rufulum	Acorales	Acoraceae	Acorus	USNM	61.1	55.3	240.2	0	91.1	77.1	255	440.9	118.1	86.2	444.3	705.6	91.2	193.9	130.5	54.9	1894.9	89.6	1.37007	1.29496	3.30739	2.16406	1.48582	0.807244	0.904981	4.2978	1
0638-2	rufulum	Acorales	Acoraceae	Acorus	USNM	50.9	61.6	233.1	0	107.4	80.8	224.8	434	127.7	83.4	488.3	703.1	102.4	174.8	129.4	59.6	2183	87.1	1.53118	1.24707	2.78218	2.00689	1.35085	0.749893	0.986862	5.02995	1
0476-2	sp nov "ex. Arisaema"	Alismatales	Araceae	Arisaema	USNM	55.7	49.6	301.1	0	129.2	83.5	410.1	389.9	127.9	72.1	369.9	602.3	81.8	271.2	111.5	17.4	1436.1	67.7	1.77393	1.56357	4.91138	4.00591	2.43229	0.900697	1.14709	3.68325	1
0476-3	sp nov "ex. Arisaema"	Alismatales	Araceae	Arisaema	USNM	62.2	48.7	298.4	0	140.7	89.3	425.7	406.1	131.5	52.5	381.7	624.7	83.9	265.9	108.3	15.7	1549.3	57.9	2.50476	1.56734	4.76708	4.5924	2.45522	0.891086	1.21422	3.81507	1
0476-4	sp nov "ex. Arisaema"	Alismatales	Araceae	Arisaema	USNM	63.9	49.4	317.6	0	131.1	85.2	407.4	412.3	129.7	58	374	604.1	80.7	274.3	113.7	19	1552.2	69.2	2.23621	1.60719	4.78169	3.96387	2.41249	0.863665	1.14072	3.76473	1
0476-5	sp nov "ex. Arisaema"	Alismatales	Araceae	Arisaema	USNM	66.7	58.4	333.8	0	146.3	83.6	436.2	437.9	146.1	60.9	442.4	412.9	85.1	279	114.5	24	1749.7	71.4	2.39901	1.7168	5.2177	3.90756	2.43668	0.83583	1.27598	3.99566	1
0477-1	sp nov "ex. Arisaema"	Alismatales	Araceae	Arisaema	USNM	54.3	47.2	270.1	0	122.9	81.2	386.2	390.3	130.8	54.2	359.7	592.1	81.5	269	94	18.1	1333.1	71.2	2.41328	1.60491	4.75616	3.77809	2.8617	0.995927	1.39149	3.41558	1
0477-2	sp nov "ex. Arisaema"	Alismatales	Araceae	Arisaema	USNM	60.7	49	299.8	0	126.8	82.7	381.5	389.5	129.5	50.8	368.7	618.4	80.4	268.8	102.4	17.1	1571.6	56	2.54921	1.6107	4.61306	4.8	2.625	0.896598	1.26465	4.03492	1
0478-1	sp nov "ex. Arisaema"	Alismatales	Araceae	Arisaema	USNM	55.7	47.6	274.2	0	106.4	81.3	432.6	397.3	134.2	NA	396.6	591.9	80.8	267.3	109.7	18.6	NA	88.7	NA	1.66089	5.32103	3.01353	2.43665	0.974836	1.22334	NA	1
0478-2	sp nov "ex. Arisaema"	Alismatales	Araceae	Arisaema	USNM	59.3	53.3	298.6	0	138.3	91.2	453.5	419.1	134.5	77.9	387.8	666.3	87.2	275.5	112.6	17.2	1887.9	85.5	1.72657	1.54243	4.97259	3.22222	2.44671	0.922639	1.19449	4.50465	1
0478-3	sp nov "ex. Arisaema"	Alismatales	Araceae	Arisaema	USNM	63.2	54.2	304.2	0	143.5	80.7	453.5	415.6	133.7	68.9	379.4	621.8	80.5	273.3	117.1	NA	NA	74.3	1.94049	1.66087	5.61958	3.67833	2.3339	0.898422	1.14176	NA	1
0479-1	sp nov "ex. Arisaema"	Alismatales	Araceae	Arisaema	USNM	56.8	54.9	373.3	0	145.7	85.1	446.6	430.9	145.1	58.7	455.3	741.3	83.1	278.1	116.5	19.7	1793.3	88.6	2.47189	1.74609	5.24794	3.13883	2.38712	0.744977	1.24549	4.16175	1
0480-1	sp nov "ex. Arisaema"	Alismatales	Araceae	Arisaema	USNM	57.7	43.5	293.7	0	126.4	84	431.1	397	127.5	50.9	374.5	619	79.8	278.3	NA	17	1406	67.1	2.50491	1.59774	5.13214	4.14754	NA	0.947566	NA	3.54156	1
0480-2	sp nov "ex. Arisaema"	Alismatales	Araceae	Arisaema	USNM	56.8	49.8	266.4	0	132.2	80.7	417.9	392.5	132	54.1	356	596.6	78.2	265	95.5	NA	1408.2	55.1	2.43993	1.68798	5.17844	4.80944	2.77487	0.994745	1.3822	3.58777	1
0480-3	sp nov "ex. Arisaema"	Alismatales	Araceae	Arisaema	USNM	61.2	42.6	281.1	0	127.7	76	395.2	386.7	130.6	NA	359.9	624.3	81.6	262.5	106.2	15	1493.4	62.9	NA	1.60049	5.2	4.17329	2.47175	0.933831	1.22976	3.86191	1
0480-4	sp nov "ex. Arisaema"	Alismatales	Araceae	Arisaema	USNM	64.1	50.4	312.9	0	150.4	84	434.6	412.8	134.7	55.6	387.9	639.1	88.3	288.4	104.5	16.4	1534.3	67.1	2.42266	1.52548	5.17381	4.29806	2.75981	0.9217	1.289	3.71681	1
0480-5	sp nov "ex. Arisaema"	Alismatales	Araceae	Arisaema	USNM	60.6	48.9	305.3	0	131.1	85.1	446.6	430.9	145.1	58.7	455.3	741.3	83.1	478.1	116.5	19.7	1793.3	88.6	2.47189	1.74609	5.24794	5.39616	4.10386	1.566	1.24549	4.16175	1
0481-3	sp nov "ex. Arisaema"	Alismatales	Araceae	Arisaema	USNM	60.6	62.4	349.6	0	160	81.9	451.1	426.8	145.3	NA	464.4	374.7	86	267.7	122	NA	1655.8	56.3	NA	1.68953	5.50794	4.75488	2.19426	0.765732	1.19098	3.87957	1
0482-1	sp nov "ex. Arisaema"	Alismatales	Araceae	Arisaema	USNM	70.1	58.8	403.5	0	166.4	90.7	470.4	NA	145	62.8	478.7	750.8	93.1	281.2	122.5	18.1	1973.1	61.9	2.30892	1.55747	5.18633	4.54281	2.29551	0.696902	1.18367	NA	1
0483-2	sp nov "ex. Arisaema"	Alismatales	Araceae	Arisaema	USNM	65.7	60.4	312.4	0	134.1	81.4	430.8	424.9	140.4	57.3	430.1	416.4	86.5	284	112.4	17.8	1666.7	72.5	2.45026	1.62312	5.29238	3.91724	2.52669	0.909091	1.24911	3.92257	1
0484-1	sp nov "ex. Arisaema"	Alismatales	Araceae	Arisaema	USNM	54.8	48.4	287.4	0	134.9	84.2	427.1	414.5	132.7	NA	378.2	598.9	82.1	260.5	105.4	18.3	1707.9	74.5	NA	1.61632	5.07245	3.49664	2.47154	0.906402	1.25901	4.12039	1
0485-1	sp nov "ex. Arisaema"	Alismatales	Araceae	Arisaema	USNM	66.9	58.2	223.5	129.8	142.3	82.6	458.7	431.8	137.8	61.3	446.4	719.9	82.3	274.7	106.1	20	1573.8	80.5	2.24796	1.67436	5.55327	3.41242	2.58907	1.22908	1.29877	3.64474	0
0485-2	sp nov "ex. Arisaema"	Alismatales	Araceae	Arisaema	USNM	63.4	50.6	308.8	0	127	78.9	401.2	406.4	133.8	59.8	399	638.9	83.7	276.7	107.4	19	1419	84.6	2.23746	1.59857	5.08492	3.27069	2.57635	0.896049	1.24581	3.49163	1
0486-1	sp nov "ex. Arisaema"	Alismatales	Araceae	Arisaema	USNM	58.1	52.5	318.5	0	121	80.4	406.6	418	141.6	NA	389.2	664.8	78.8	275.5	99	17.9	1511.6	77.9	NA	1.79695	5.05721	3.53659	2.78283	0.864992	1.4303	3.61627	1
0486-2	sp nov "ex. Arisaema"	Alismatales	Araceae	Arisaema	USNM	71.2	55.9	324.9	0	140.8	77.7	NA	420.2	143.2	NA	443.6	675.3	87.1	273.4	107.7	20.3	1692.3	56.2	NA	1.64409	NA	4.86477	2.53853	0.84149	1.32962	4.02737	1
0487-1	sp nov "ex. Arisaema"	Alismatales	Araceae	Arisaema	USNM	67.3	58.1	347	0	142.2	84.1	433.3	428.3	142	68.4	440.3	718.6	85.8	297.4	116.8	18.5	1729.7	90.3	2.07602	1.65501	5.1522	3.29347	2.54623	0.857061	1.21575	4.03852	1
0488-1	sp nov "ex. Arisaema"	Alismatales	Araceae	Arisaema	USNM	56.3	50.4	283	0	126.5	76.9	396.3	404.7	138.7	57.8	411.8	655.5	79.7	206.5	97.7	14.2	1390.8	61.9	2.39965	1.74028	5.15345	3.33603	2.11361	0.729682	1.41965	3.43662	1
0488-2	sp nov "ex. Arisaema"	Alismatales	Araceae	Arisaema	USNM	50	48.2	274	0	116.5	78.2	353.3	363.3	129	54.2	355.4	570.8	77.1	251.6	88	16.9	1225.5	51.9	2.38007	1.67315	4.5179	4.84778	2.85909	0.918248	1.46591	3.37325	1
0489-1	sp nov "ex. Arisaema"	Alismatales	Araceae	Arisaema	USNM	61.7	60.1	291.7	0	123.9	74.7	384.4	394.4	139.4	56.5	390.3	615.6	75.8	263.3	99.2	15.3	1375.2	74.3	2.46726	1.83905	5.14592	3.54374	2.65423	0.90264	1.40524	3.48682	1
0489-3	sp nov "ex. Arisaema"	Alismatales	Araceae	Arisaema	USNM	56.9	59	290.4	0	126.2	76.3	394	400.9	136.4	56.2	398.5	660.4	80.4	289.9	98.6	14.4	1425.3	79.7	2.42705	1.69652	5.16383	3.63739	2.94016	0.998278	1.38337	3.55525	1
0490-3	sp nov "ex. Arisaema"	Alismatales	Araceae	Arisaema	USNM	63.3	50.4	300.4	0	127.5	78.7	399.8	410.7	132.9	55.6	419	643.9	78	267.1	NA	14.5	1473.2	74.1	2.39029	1.70385	5.08005	3.60459	NA	0.889148	NA	3.58705	1
0491-2	sp nov "ex. Arisaema"	Alismatales	Araceae	Arisaema	USNM	60.7	47.7	302.4	0	114.7	73.8	396.3	404.9	131.7	57.1	378.1	644	81.9	254.1	NA	14.2	1382.4	66.1	2.30648	1.60806	5.36992	3.84418	NA	0.840278	NA	3.41418	1
0491-3	sp nov "ex. Arisaema"	Alismatales	Araceae	Arisaema	USNM	60.4	49.6	313.6	0	122	82	408.7	398.2	127.6	58.5	398.7	621.3	76.7	262.2	106.5	18	1356	76.9	2.1812	1.66362	4.98415	3.40962	2.46197	0.836097	1.19812	3.40532	1
0492-4	sp nov "ex. Arisaema"	Alismatales	Araceae	Arisaema	USNM	57.2	53.9	283.4	0	117	81.3	402.9	401.4	138.3	54.7	380.8	645	76	248.3	90.1	18	1332.3	69	2.52834	1.81974	4.95572	3.59855	2.75583	0.876147	1.53496	3.31913	1
0493-2	sp nov "ex. Arisaema"	Alismatales	Araceae	Arisaema	USNM	60.5	52.7	296.3	0	128.1	78.9	407.2	396.2	140.3	63	399.2	643.3	84.8	268.8	96.6	18	1385.1	70	2.22698	1.65448	5.16096	3.84	2.78261	0.907189	1.45238	3.49596	1
0493-3	sp nov "ex. Arisaema"	Alismatales	Araceae	Arisaema	USNM	56.6	54.5	240.6	0	108.2	75.6	361.7	374.2	136.3	51.1	369.4	616.2	78.2	242	NA	18.2	1315.4	55.8	2.66732	1.74297	4.78439	4.33692	NA	1.00582	NA	3.51523	1
0379-1	musae	Poales	Bromeliaceae	Bromelia	USNM	64.5	40.9	254.5	0	116.4	93	335	391.6	124.5	53	412.2	674.5	90	162.2	115.6	NA	1653.3	41.8	2.34906	1.38333	3.60215	3.88038	1.40311	0.637328	1.07699	4.22191	1
0380-1	musae	Poales	Bromeliaceae	Bromelia	USNM	56.8	40.8	151.6	90	100.7	69.6	279.5	389.6	123.8	53.4	380	639.7	80.2	164.4	127.2	52.6	1606.5	63	2.31835	1.54364	4.0158	2.60952	1.29245	1.08443	0.97327	4.12346	0
0380-2	musae	Poales	Bromeliaceae	Bromelia	USNM	NA	41.8	253.5	0	114.3	71.4	314.9	360.2	118.3	51.1	334.6	620.1	81.5	144.1	NA	39.7	1348.1	52.4	2.31507	1.45153	4.41036	2.75	NA	0.568442	NA	3.74264	1
0380-3	musae	Poales	Bromeliaceae	Bromelia	USNM	64.3	45.5	273.6	0	120.1	78.1	312.8	373.1	117.3	67	363.2	620	77.5	162.7	106.4	48.8	1489.4	58	1.75075	1.51355	4.00512	2.80517	1.52914	0.594664	1.10244	3.99196	1

## Sheet: graphs
									bl	head		bl	rost-l		bl	ant-1		bl	fem-l		bl	tib-l		bl	dist-l		head	fem-l
									1460.8	371.1		1460.8	80.6		1460.8	64.3		1460.8	382.7		1460.8	640.9		1460.8	65.9		371.1	382.7
									1620.8	361.2		1620.8	79.2		1620.8	59.8		1620.8	365.1		1620.8	659.6		1620.8	56.3		361.2	365.1
									1303.2	363.1		1303.2	81.5		1303.2	53.4		1303.2	391.9		1303.2	671.4		1303.2	69.4		363.1	391.9
									2345.3	506.3		2345.3	132.7		2345.3	93.65		2345.3	725.2		2345.3	1262.5		2345.3	101		506.3	725.2
												2639	139					2639	800.7		2639	1426.5		2639	132
									1839.2	438.3					1839.2	88.1
									1813.3	398.3		1813.3	115.2		1813.3	73.7		1813.3	496.9		1813.3	781.7		1813.3	93.7		398.3	496.9
									1797.5	426.5		1797.5	120.1		1797.5	80		1797.5	388.54		1797.5	558.1		1797.5	104		426.5	388.54
									2118.3	427.3		2118.3	118.5		2118.3	75.6
									1840.2	420		1840.2	118.9					1840.2	467.5		1840.2	733.5		1840.2	95.8		420	467.5
																											473.4	589.4
									2130.7	458.9		2130.7	123.7		2130.7	83.1		2130.7	572.6		2130.7	829.6		2130.7	114.1		458.9	572.6
									1852.9	452.7		1852.9	118.8		1852.9	75.3		1852.9	533.5		1852.9	767.1		1852.9	105.9		452.7	533.5
									2104.9	481.2		2104.9	122.9		2104.9	44		2104.9	599.9		2104.9	1008.9		2104.9	138.6		481.2	599.9
									1965.5	478.1					1965.5	87.2					1965.5	1023		1965.5	120.6
									2321.3	507.3					2321.3	98		2321.3	652.5		2321.3	1093.5		2321.3	106		507.3	652.5
									2186.6	490.6					2186.6	99.4					2186.6	1129		2186.6	113.2
									2171.8	501.9		2171.8	136.4		2171.8	83.1		2171.8	635.2		2171.8	1062.7		2171.8	115.4		501.9	635.2
									1921.2	471.5		1921.2	140.6		1921.2	102.9		1921.2	616.1		1921.2	1016.4		1921.2	126.7		471.5	616.1
									2309.3	522.1		2309.3	131		2309.3	104.8		2309.3	689.5		2309.3	1144.8		2309.3	131.6		522.1	689.5
									2319.5	474.6		2319.5	131.4		2319.5	96.1		2319.5	615.6		2319.5	1041.9		2319.5	123.4		474.6	615.6
									2331.1	462		2331.1	135.1		2331.1	88.8		2331.1	596.2		2331.1	979.2		2331.1	123.2		462	596.2
																											451.2	615.4
									2340.7	494		2340.7	115.6		2340.7	98.8		2340.7	674.8		2340.7	1105.2		2340.7	114		494	674.8
									2588	508.1		2588	135.7		2588	94.1		2588	702.3		2588	1136.2		2588	132.5		508.1	702.3
									2313	468.8					2313	95.6		2313	628.4		2313	1081.4		2313	127.2		468.8	628.4
									2111	447.2		2111	119.1		2111	81.6		2111	514.3		2111	858.2		2111	98.1		447.2	514.3
									2037.9	489.3		2037.9	131		2037.9	90.7		2037.9	587.3		2037.9	950.4		2037.9	100.8		489.3	587.3
									1685	431.3		1685	128.8		1685	80.5		1685	511.9		1685	771.2		1685	102.6		431.3	511.9
																											445.8	565.1
									1894.6	485.3		1894.6	125.9		1894.6	93.3		1894.6	562.3								485.3	562.3
									1956.1	475.2		1956.1	125.2		1956.1	77.5		1956.1	550.3		1956.1	855		1956.1	96.9		475.2	550.3
									1982	471		1982	124.7		1982	81.4		1982	581.6		1982	946		1982	105.6		471	581.6
									2157.7	477.4		2157.7	126.4		2157.7	92.4		2157.7	594		2157.7	917.8		2157.7	109.6		477.4	594
																											493.3	592.1
									2355.8	286.9		2355.8	129.4		2355.8	88.6		2355.8	578.2		2355.8	953.2		2355.8	110.3		286.9	578.2
									2369.8	533.1		2369.8	128.2		2369.8	85.9		2369.8	595.2		2369.8	911.7		2369.8	105.2		533.1	595.2
									1630.9	390.9		1630.9	112.3		1630.9	79.4		1630.9	428.5		1630.9	684.3		1630.9	96.1		390.9	428.5
									2010.8	431.5		2010.8	123		2010.8	88.7		2010.8	502.9		2010.8	797.1		2010.8	103.6		431.5	502.9
									1996.1	448.6		1996.1	127.9		1996.1	86.3		1996.1	581.2		1996.1	980.2		1996.1	108.2		448.6	581.2
									1919.3	453.9		1919.3	125.7		1919.3	83.9		1919.3	574.1		1919.3	912.9		1919.3	103.6		453.9	574.1
									1896.7	424.7		1896.7	123.2		1896.7	76.4		1896.7	505.7		1896.7	823.1		1896.7	109.6		424.7	505.7
									2203.2	459		2203.2	127.8		2203.2	88.6		2203.2	563.7		2203.2	872.1		2203.2	107.1		459	563.7
									2243.9	479.9		2243.9	129.6		2243.9	90.3		2243.9	644.7		2243.9	989.8		2243.9	106.7		479.9	644.7
									2004.8	456.5		2004.8	125.2		2004.8	85.7		2004.8	569.7		2004.8	861.2		2004.8	106.7		456.5	569.7
									2151.3	463.8		2151.3	130.8		2151.3	94.3		2151.3	594		2151.3	935.3		2151.3	107.2		463.8	594
									2114.4	444.6		2114.4	120.9		2114.4	83.8		2114.4	581.9		2114.4	880.2		2114.4	110.2		444.6	581.9
									1598.2	420.9		1598.2	119.3		1598.2	68.3		1598.2	510.9		1598.2	819.7		1598.2	98.3		420.9	510.9
																											466.4	510.9
									1988.5	465.3		1988.5	129.5		1988.5	80.1		1988.5	601.1		1988.5	976		1988.5	112.2		465.3	601.1
									2060.7	477.4		2060.7	130.1		2060.7	85		2060.7	589.3		2060.7	978.3		2060.7	111.9		477.4	589.3
									1903.2	445.3		1903.2	129.8		1903.2	81.5		1903.2	525.6		1903.2	905.4		1903.2	104.7		445.3	525.6
									2114.4	487.8		2114.4	137.2		2114.4	90.2		2114.4	670.4		2114.4	1098.9		2114.4	123.5		487.8	670.4
									1816	447.1		1816	105.6		1816	83.9		1816	494		1816	824.9		1816	118.3		447.1	494
									1916.2	448.8		1916.2	125.9		1916.2	77.7		1916.2	510.8		1916.2	797.9		1916.2	113.4		448.8	510.8
									1939.7	440.5		1939.7	119.4		1939.7	65.3		1939.7	495.8		1939.7	825.7		1939.7	108		440.5	495.8
									1520.5	414.8		1520.5	112.3		1520.5	71.9		1520.5	435.7								414.8	435.7
									1427	402.9					1427	70.2		1427	427.3		1427	730.9		1427	99.5		402.9	427.3
									1386	409.7		1386	109.4		1386	72.2		1386	366.1		1386	605.4		1386	85.3		409.7	366.1
									2019.1	463.3		2019.1	126.9		2019.1	83.9		2019.1	564.3		2019.1	901		2019.1	112.3		463.3	564.3
									1879.6	445.9		1879.6	117.2		1879.6	66.4		1879.6	565.8		1879.6	884.2		1879.6	107		445.9	565.8
									1945.1	412		1945.1	130.8		1945.1	91		1945.1	616.8		1945.1	934					412	616.8
									2069.8	467.6		2069.8	128.5		2069.8	79.6		2069.8	579.7		2069.8	899.4		2069.8	116.5		467.6	579.7
									1676.8	421.9		1676.8	119.5					1676.8	540.1		1676.8	871.7		1676.8	106.4		421.9	540.1
									1881.7	397.3		1881.7	127		1881.7	88.9		1881.7	524.6		1881.7	866.2		1881.7	111.2		397.3	524.6
									2085.4	463.2		2085.4	134.1		2085.4	82.6		2085.4	545.5		2085.4	828.6		2085.4	104.8		463.2	545.5
												2381.9	138		2381.9	97.5		2381.9	641.6		2381.9	1028.3		2381.9	112.2
									1836.1	480.3		1836.1	123.8		1836.1	78.5		1836.1	507.1		1836.1	807.8		1836.1	108.4		480.3	507.1
									1756.4	450		1756.4	122.1		1756.4	76.3		1756.4	524.9		1756.4	851.8		1756.4	103.7		450	524.9
									1888.8	442.1		1888.8	128.1		1888.8	82.1		1888.8	541.5		1888.8	855.7		1888.8	101.9		442.1	541.5
									1815.2	468.8		1815.2	136		1815.2	87.1		1815.2	615.8		1815.2	1019.2		1815.2	113.1		468.8	615.8
									1735.1	450.1		1735.1	126.1		1735.1	81
									1841.2	434.4		1841.2	139.9		1841.2	80.8		1841.2	616.2		1841.2	979.7		1841.2	114.6		434.4	616.2
									1855.5	423.5		1855.5	115.1		1855.5	73.1		1855.5	455.1		1855.5	722.9		1855.5	94.2		423.5	455.1
									1663.2	424		1663.2	114.4		1663.2	76.8
									1523.1	418.7		1523.1	116.9		1523.1	69.2		1523.1	444.4		1523.1	720.9		1523.1	94		418.7	444.4
																											453.8	586.3
									1620.5	416.2		1620.5	120.8		1620.5	66.1		1620.5	414.5								416.2	414.5
									2003.8	467.8		2003.8	118		2003.8	81.6		2003.8	546.2		2003.8	861.9		2003.8	101.6		467.8	546.2
									2010.1	466.7		2010.1	119.5		2010.1	65.9		2010.1	497.5		2010.1	793.9		2010.1	104.7		466.7	497.5
									1922.7	464.6		1922.7	128.2		1922.7	76		1922.7	529.7		1922.7	833		1922.7	106.9		464.6	529.7
									2320.6	486.1		2320.6	134.9		2320.6	75.1		2320.6	580.4		2320.6	944.1		2320.6	114.5		486.1	580.4
									2314.4	496.5		2314.4	127.8		2314.4	78.5		2314.4	579.8		2314.4	942.7		2314.4	108.5		496.5	579.8
									1668.7	443.1		1668.7	120.3		1668.7	68.6		1668.7	461.2		1668.7	766.6		1668.7	92.4		443.1	461.2
									1605.3	424		1605.3	116.7		1605.3	66.5		1605.3	456.5		1605.3	749.8		1605.3	94.4		424	456.5
									1705	424		1705	111.4		1705	67.1		1705	482.4		1705	751.2		1705	101.9		424	482.4
									1832.4	406.8		1832.4	111.5		1832.4	68		1832.4	459.6		1832.4	754.7		1832.4	98.8		406.8	459.6
									1814.3	414.3		1814.3	118.7		1814.3	59.7		1814.3	474.1		1814.3	790.8		1814.3	96.1		414.3	474.1
									1931.8	430.8		1931.8	119.2		1931.8	66.3		1931.8	468.8		1931.8	766.2		1931.8	95.1		430.8	468.8
									1804.1	431.1		1804.1	120.3		1804.1	65.2		1804.1	449.1		1804.1	726.1		1804.1	97.6		431.1	449.1
									1562.1	418.9		1562.1	114.1		1562.1	54.9		1562.1	405.2		1562.1	632.6		1562.1	95.6		418.9	405.2
									1795.4	435.1		1795.4	119.5		1795.4	71.1		1795.4	469.4		1795.4	749		1795.4	97.1		435.1	469.4
									1706.7	399.9		1706.7	120.7		1706.7	71		1706.7	427								399.9	427
												1683.8	119.1		1683.8	68.6		1683.8	424.9		1683.8	690.6		1683.8	98.8
									1984.4	455.5		1984.4	123.1		1984.4	75.9
									1986.7	456.5		1986.7	130.4		1986.7	73.7		1986.7	507.5		1986.7	813.8		1986.7	102.8		456.5	507.5
									1974.7	481		1974.7	119.5		1974.7	66.7		1974.7	540.5		1974.7	860.2		1974.7	107.3		481	540.5
									1834.2	435		1834.2	116.9		1834.2	73.2		1834.2	501.6		1834.2	835		1834.2	99.8		435	501.6
									2372.7	490.9		2372.7	133.3		2372.7	70		2372.7	610.1		2372.7	959.2		2372.7	114.5		490.9	610.1
									1828.6	427.3		1828.6	117.3		1828.6	70.9		1828.6	554.2		1828.6	850.7		1828.6	100.2		427.3	554.2
									1800.3	419.1		1800.3	114.4		1800.3	65.8		1800.3	475.9		1800.3	737.1		1800.3	97.6		419.1	475.9
									2013.4	435.9		2013.4	113		2013.4	72.3		2013.4	503.4		2013.4	783.7		2013.4	103.9		435.9	503.4
									2491.8	466		2491.8	129.4		2491.8	73.9		2491.8	611.4		2491.8	1006.6		2491.8	111.3		466	611.4
									2128.7	480.6		2128.7	130.1		2128.7	73.7		2128.7	589.6		2128.7	947.4		2128.7	112.7		480.6	589.6
									2203.1	518.6		2203.1	139.2		2203.1	87.1		2203.1	686.2		2203.1	1139.4		2203.1	112.3		518.6	686.2
									2157.2	527.7		2157.2	130.3		2157.2	97		2157.2	645.1		2157.2	1056		2157.2	118.1		527.7	645.1
									1878.1	449.1		1878.1	121.5		1878.1	61.4		1878.1	532.6		1878.1	813.6		1878.1	97.4		449.1	532.6
									1868.7	438.3		1868.7	112.2		1868.7	68.9		1868.7	453		1868.7	714.6					438.3	453
									1821.2	445.8		1821.2	114.8		1821.2	61.7		1821.2	512.6		1821.2	803.5		1821.2	106.2		445.8	512.6
									1767.8	431		1767.8	119.5		1767.8	64.9		1767.8	472.8		1767.8	742.3		1767.8	100.3		431	472.8
									1682.5	438.4		1682.5	116.1		1682.5	61.4		1682.5	486.1		1682.5	749		1682.5	97.9		438.4	486.1
									1662.6	423.5		1662.6	112.5		1662.6	65.3		1662.6	448.9		1662.6	699		1662.6	96.6		423.5	448.9
									2006.9	476.3		2006.9	126.6		2006.9	63.1		2006.9	575.5		2006.9	881.2		2006.9	99.5		476.3	575.5
												2181.1	125.4		2181.1	63.2		2181.1	603.5		2181.1	940.3		2181.1	99.2
									1971.1	489.6		1971.1	127.7		1971.1	74.5		1971.1	607.4		1971.1	937.3		1971.1	111.8		489.6	607.4
									1856	486		1856	135.1		1856	70.4		1856	602.9								486	602.9
									1954.6	464.7		1954.6	131		1954.6	74.3		1954.6	572.2		1954.6	905.7		1954.6	100.5		464.7	572.2
									1707.1	446.3		1707.1	122.1		1707.1	66.6		1707.1	490.3		1707.1	813.3		1707.1	98.4		446.3	490.3
									2073.4	489.9		2073.4	139.5		2073.4	79.4		2073.4	599.8		2073.4	975.1		2073.4	95.5		489.9	599.8
									1867.3	461.9		1867.3	136.5		1867.3	77.4		1867.3	561.1		1867.3	892.1		1867.3	105.6		461.9	561.1
									1537.6	404.5		1537.6	115.1		1537.6	57.6		1537.6	407.8		1537.6	681.5		1537.6	89.8		404.5	407.8
									1435	401.5		1435	111.6		1435	63.2		1435	430.8		1435	412.4		1435	102.6		401.5	430.8
									1549.4	432.6		1549.4	124		1549.4	69.5		1549.4	447.3		1549.4	416.2		1549.4	96.7		432.6	447.3
									1543.2	421.4		1543.2	106.5		1543.2	63.9		1543.2	447.7		1543.2	725.7		1543.2	107.3		421.4	447.7
									1631.3	439.8		1631.3	114.6		1631.3	60.4		1631.3	499.4		1631.3	766.3		1631.3	101.6		439.8	499.4
									1887.6	464.4		1887.6	124.5		1887.6	74.5		1887.6	508.3		1887.6	818.5		1887.6	102.4		464.4	508.3
									1969.7	477.6		1969.7	130.1		1969.7	71.8		1969.7	512.3		1969.7	849.3		1969.7	96.9		477.6	512.3
									1856.6	477		1856.6	129.8		1856.6	77.9		1856.6	529		1856.6	884.4		1856.6	92.7		477	529
												1959.6	135.7		1959.6	74.3		1959.6	557.1		1959.6	497.4		1959.6	109.2
									2190.6	494.3		2190.6	124.1		2190.6	79.4		2190.6	576.1		2190.6	939.3					494.3	576.1
									2231.1	520.6		2231.1	128.8		2231.1	71.4		2231.1	575.8		2231.1	954.7		2231.1	105.8		520.6	575.8
									2095.4	505.6		2095.4	122.9		2095.4	76.5		2095.4	579.8		2095.4	919		2095.4	114.5		505.6	579.8
									2116.3	509.6		2116.3	125.7		2116.3	80.9		2116.3	576.3		2116.3	905.6		2116.3	113		509.6	576.3
									1828.1	457.7		1828.1	122.9		1828.1	76.8		1828.1	486.5		1828.1	825.5		1828.1	81		457.7	486.5
									2045.6	472.7		2045.6	117.6		2045.6	71.5		2045.6	540.5		2045.6	841.2		2045.6	87.6		472.7	540.5
									1922.2	458		1922.2	128		1922.2	73.3		1922.2	550.5		1922.2	907.8		1922.2	101.1		458	550.5
									2371	496.5		2371	129.9		2371	67.3		2371	568.9		2371	936.3		2371	109.1		496.5	568.9
									1410.2	396.4		1410.2	108.7		1410.2	50.7		1410.2	422		1410.2	675.7		1410.2	91.4		396.4	422
									1843.6	447.2		1843.6	119.3		1843.6	65.1		1843.6	493.9		1843.6	763.1		1843.6	95.3		447.2	493.9
									1573.6	405.9		1573.6	112.3		1573.6	55.6		1573.6	414.3		1573.6	671.6		1573.6	85.3		405.9	414.3
									1720.8	450.8		1720.8	120.4		1720.8	78.6		1720.8	515		1720.8	821.9		1720.8	108.2		450.8	515
									1695.7	433.4		1695.7	120.3		1695.7	64.5		1695.7	476		1695.7	767.1		1695.7	85.6		433.4	476
									1537.6	404.2		1537.6	106.3		1537.6	63.3		1537.6	418.6		1537.6	684.3		1537.6	93.6		404.2	418.6
									1740.2	435		1740.2	119.3		1740.2	69.3		1740.2	462.1		1740.2	728.1		1740.2	92.8		435	462.1
									1732.6	444.3		1732.6	124.9		1732.6	68.7		1732.6	479.8		1732.6	747.6		1732.6	95.6		444.3	479.8
									1555.2	422.4		1555.2	114.5		1555.2	70.5		1555.2	446.6		1555.2	684		1555.2	89.8		422.4	446.6
									1400.2	365.1		1400.2	107.6		1400.2	55.8		1400.2	359.6		1400.2	576.2		1400.2	81.3		365.1	359.6
									1398.2	390.2		1398.2	109.8		1398.2	63.1		1398.2	398.1		1398.2	650.4		1398.2	89.7		390.2	398.1
									1777.8	457.3		1777.8	118.2		1777.8	73.8		1777.8	509.5		1777.8	835.3		1777.8	93.4		457.3	509.5
									1468.9	398.5		1468.9	104		1468.9	62.6		1468.9	402.3		1468.9	646.2		1468.9	95.5		398.5	402.3
									1508.8	414		1508.8	105.2		1508.8	71		1508.8	435.9		1508.8	665.3		1508.8	91.7		414	435.9
									1717.9	424.5		1717.9	114.2		1717.9	66.8		1717.9	419		1717.9	701		1717.9	90.3		424.5	419
									1260.4	378.7		1260.4	109.1		1260.4	54.3		1260.4	388		1260.4	611.7		1260.4	81.5		378.7	388
									1481	406.5		1481	112		1481	63.6		1481	422		1481	681		1481	87		406.5	422
									1368.6	399		1368.6	110.2		1368.6	57		1368.6	405.6		1368.6	658.2		1368.6	91.3		399	405.6
									1416.6	409.3		1416.6	115.8		1416.6	61.1		1416.6	444.5		1416.6	715.2		1416.6	94.6		409.3	444.5
									1293.1	407.7		1293.1	106.2		1293.1	55		1293.1	411.9		1293.1	682.4		1293.1	81.2		407.7	411.9
									1531.1	421.6		1531.1	118.9		1531.1	67.5		1531.1	464.1		1531.1	749.4		1531.1	97.2		421.6	464.1
									1691.9	417.6		1691.9	118.3		1691.9	62		1691.9	458		1691.9	747.9		1691.9	93.9		417.6	458
									1454.8	412.1		1454.8	112		1454.8	47.8		1454.8	456.9		1454.8	737.5		1454.8	94.3		412.1	456.9
									1524.8	420.8		1524.8	119.7		1524.8	58		1524.8	473.6		1524.8	750.4		1524.8	90.8		420.8	473.6
									1333.6	408.2		1333.6	119.6		1333.6	63.5		1333.6	449.4		1333.6	728		1333.6	95.3		408.2	449.4
									1553.9	408.7		1553.9	111.8		1553.9	56.9		1553.9	419.4		1553.9	656.8		1553.9	96.8		408.7	419.4
									1818	420.2		1818	114.6		1818	63.4		1818	457.1		1818	704		1818	98		420.2	457.1
									1829.9	447.5		1829.9	111.4		1829.9	69.4		1829.9	455		1829.9	730.3		1829.9	95.7		447.5	455
									1483.4	421.4		1483.4	116.6		1483.4	58.4		1483.4	467.6		1483.4	747.4		1483.4	101.1		421.4	467.6
									1511.9	417.8		1511.9	113.3		1511.9	62.8		1511.9	442.1		1511.9	694.5		1511.9	97.2		417.8	442.1
									1466.5	385.3		1466.5	108.8		1466.5	62.1		1466.5	374.4		1466.5	626.7		1466.5	93.4		385.3	374.4
									1584.6	421.2		1584.6	115.9		1584.6	66.8		1584.6	427.6		1584.6	669.1		1584.6	90.6		421.2	427.6
									1381.6	394.5		1381.6	107.5		1381.6	53.2		1381.6	402.3		1381.6	628.1		1381.6	90.4		394.5	402.3
									1536	403.6		1536	110.3		1536	65.1		1536	416.7		1536	644		1536	94.4		403.6	416.7
									1535	389.1		1535	105.1		1535	59.6		1535	402.2		1535	623.2		1535	70		389.1	402.2
									1574.5	412		1574.5	117		1574.5	61.2		1574.5	434.2		1574.5	666.3		1574.5	93.7		412	434.2
									1673.8	421.6		1673.8	121.5		1673.8	57.8		1673.8	463.2		1673.8	742.8		1673.8	101		421.6	463.2
									1532	402		1532	113.3		1532	67.4		1532	444.8		1532	710.1		1532	92.3		402	444.8
									1616.9	395.9		1616.9	104.5		1616.9	59.8		1616.9	418.4		1616.9	646		1616.9	92		395.9	418.4
									1559.4	410.2		1559.4	117.3		1559.4	63.4		1559.4	453.4		1559.4	735.8		1559.4	84.4		410.2	453.4
									1287.6	376.2		1287.6	106.9		1287.6	57.3		1287.6	379.7		1287.6	613.3		1287.6	80.6		376.2	379.7
									1606.9	423.1		1606.9	118.9		1606.9	58.9		1606.9	453.7		1606.9	722.3		1606.9	87.5		423.1	453.7
									1938.3	414.3		1938.3	81.4					1938.3	398.5		1938.3	667.5		1938.3	84.6		414.3	398.5
									2158.7	421.8		2158.7	87		2158.7	54.8
									2273.9	400.6		2273.9	89.2		2273.9	57		2273.9	453.9		2273.9	744.6		2273.9	90.4		400.6	453.9
									2019.9	405.5		2019.9	83.4		2019.9	50.8		2019.9	430		2019.9	681.4		2019.9	81		405.5	430
									1918	411.9		1918	83.2		1918	56.4		1918	428.2		1918	688.6		1918	79.3		411.9	428.2
									2037.2	401.9		2037.2	85.9		2037.2	51.9		2037.2	436		2037.2	769.9		2037.2	78.5		401.9	436
									1821.2	354		1821.2	68.7		1821.2	52.1		1821.2	371.9		1821.2	562.4		1821.2	76.9		354	371.9
									1699.2	336.7		1699.2	69.7		1699.2	49.8		1699.2	322.1		1699.2	514.1		1699.2	70.4		336.7	322.1
									1980.9	379.9		1980.9	81.8		1980.9	50.2		1980.9	390.1		1980.9	620.1		1980.9	80.2		379.9	390.1
												1692.3	82.6		1692.3	61.2
												2785.6	102.1		2785.6	81.4
									2320.5	401.9		2320.5	94.9		2320.5	56		2320.5	540.3		2320.5	892.9		2320.5	91.2		401.9	540.3
									2212.7	352.9		2212.7	80.6		2212.7	53.4		2212.7	416.5		2212.7	587.3		2212.7	82.7		352.9	416.5
									1885.1	349.4					1885.1	52.1								1885.1	73.8
									1929.2	333.5		1929.2	77.9		1929.2	52.8		1929.2	325.6								333.5	325.6
									1871.4	381.9		1871.4	79.4		1871.4	56.8		1871.4	440		1871.4	655.8		1871.4	86.3		381.9	440
									1801.2	377.1		1801.2	85.9		1801.2	53.8		1801.2	422.6		1801.2	676.6		1801.2	82.3		377.1	422.6
									1347.9	325.8		1347.9	74.9		1347.9	46.4					1347.9	512.4
									2278.5	401.4		2278.5	84.2		2278.5	50.3		2278.5	401.3		2278.5	629.4		2278.5	83.2		401.4	401.3
									2376.8	398.7		2376.8	88.7		2376.8	59.4		2376.8	519.1		2376.8	819.4		2376.8	95.5		398.7	519.1
									1212.2	296.3		1212.2	67.6		1212.2	38.8		1212.2	296.5		1212.2	411.5		1212.2	73.3		296.3	296.5
									2169.6	423.9		2169.6	78.8		2169.6	58.3		2169.6	521.2		2169.6	847.5		2169.6	88.3		423.9	521.2
									2337.9	400.6		2337.9	87		2337.9	54.3		2337.9	496.2		2337.9	783.3		2337.9	90.63		400.6	496.2
									2321.9	417.1		2321.9	80.2		2321.9	59.7		2321.9	508.5		2321.9	804.9		2321.9	96.3		417.1	508.5
									2073.5	406.3		2073.5	83.1		2073.5	60.3		2073.5	469.9		2073.5	732.5		2073.5	92.9		406.3	469.9
									2081.5	426		2081.5	79.5		2081.5	65.2
									2081.3	404.3		2081.3	80.6		2081.3	56.3		2081.3	402.1		2081.3	675.3		2081.3	89.7		404.3	402.1
									2024.5	402.1		2024.5	77.4		2024.5	58.7		2024.5	431.8		2024.5	711.2		2024.5	92.5		402.1	431.8
									1928.5	403.7		1928.5	82.2		1928.5	56.6		1928.5	425.8		1928.5	559.3		1928.5	97		403.7	425.8
									1664.5	351.2		1664.5	74.5		1664.5	55.7		1664.5	393.4		1664.5	569.5		1664.5	75.3		351.2	393.4
									1978	417.1		1978	81.1		1978	53.9		1978	416.7		1978	626.5		1978	89.8		417.1	416.7
									1897.4	396.3		1897.4	76.4		1897.4	55.1		1897.4	360.9		1897.4	547.6		1897.4	85.9		396.3	360.9
									1940.9	394		1940.9	78.9		1940.9	54		1940.9	370.9		1940.9	567.7		1940.9	77.3		394	370.9
									1765.5	337.3					1765.5	44.7		1765.5	291.5								337.3	291.5
									1507.7	311.7		1507.7	70		1507.7	37.5		1507.7	256.7		1507.7	431.8		1507.7	66.9		311.7	256.7
									1377.8	323.5		1377.8	75.4		1377.8	42.5		1377.8	250		1377.8	405.5		1377.8	69.9		323.5	250
												1437.4	77		1437.4	50.8		1437.4	300.5		1437.4	501.9		1437.4	79.4
									1727.7	349.3		1727.7	77.7		1727.7	51.1		1727.7	365.3		1727.7	548.3		1727.7	80		349.3	365.3
									2570.7	406.1		2570.7	89.2		2570.7	65.2
									2133.1	388.2		2133.1	81.7		2133.1	54.1		2133.1	380.8		2133.1	597		2133.1	80.9		388.2	380.8
									2008.4	400.8		2008.4	76.1		2008.4	52.7		2008.4	458.5								400.8	458.5
									2077.1	345.3		2077.1	87.1		2077.1	58.4		2077.1	498.9								345.3	498.9
									1646.3	381.9		1646.3	75.8		1646.3	48.9		1646.3	302.8		1646.3	450.2		1646.3	75.8		381.9	302.8
									1617.1	363		1617.1	73.1		1617.1	48.3		1617.1	257		1617.1	288.5		1617.1	67.7		363	257
									1966.2	396.3		1966.2	72.6		1966.2	58.9
									1591.2	341.7		1591.2	76.3		1591.2	45.9
									2043.6	421.3		2043.6	80		2043.6	55.7		2043.6	442.3		2043.6	716.6		2043.6	92.3		421.3	442.3
									2053.8	411.6		2053.8	87.2		2053.8	57.6		2053.8	463.6		2053.8	715.9		2053.8	90.3		411.6	463.6
									2034.7	418.7		2034.7	83.3		2034.7	57.8
																											378.9	408.5
									1884	380		1884	77.3		1884	45.7		1884	407.2		1884	651.5		1884	83.9		380	407.2
									1919.5	367.4		1919.5	78.9		1919.5	51.3		1919.5	391.6		1919.5	617.1		1919.5	82.9		367.4	391.6
									2259.5	420.7		2259.5	84.4		2259.5	47.1		2259.5	493.5		2259.5	766.8		2259.5	95.2		420.7	493.5
									2193.1	446.9		2193.1	84.9		2193.1	63.5		2193.1	526.8		2193.1	789.5		2193.1	93		446.9	526.8
									2039	388.8		2039	71.7		2039	55.5		2039	350.7		2039	538.8		2039	81.2		388.8	350.7
									1919.1	393.2		1919.1	73		1919.1	54.3		1919.1	345.9		1919.1	544		1919.1	74.2		393.2	345.9
									1814.1	387.4		1814.1	89.5		1814.1	64		1814.1	497.5		1814.1	721		1814.1	100.3		387.4	497.5
									2142	415.5		2142	83.4		2142	63.5		2142	499		2142	756.8		2142	96.3		415.5	499
									2085.1	397.3		2085.1	86.2		2085.1	56.6		2085.1	478.6		2085.1	707.3		2085.1	94.3		397.3	478.6
									2035.6	359.8		2035.6	84.5		2035.6	67.5		2035.6	481.2		2035.6	747.7		2035.6	102.4		359.8	481.2
									2357.9	427		2357.9	86.7		2357.9	60.9		2357.9	496.5		2357.9	753.4		2357.9	97.2		427	496.5
									2159.4	418		2159.4	80		2159.4	60.9		2159.4	478.4		2159.4	762		2159.4	95		418	478.4
									2513.4	472.8		2513.4	91.3		2513.4	73		2513.4	553.9		2513.4	888.5		2513.4	98.1		472.8	553.9
									2344.9	442.6		2344.9	85.8		2344.9	65.9		2344.9	501.4		2344.9	826.9		2344.9	93.3		442.6	501.4
									2640.1	476.9		2640.1	84.6		2640.1	62.3		2640.1	523.6		2640.1	853.7		2640.1	95.6		476.9	523.6
									2260.1	431.7		2260.1	94.4		2260.1	58		2260.1	502.5		2260.1	798.6		2260.1	91.5		431.7	502.5
												2493.1	95.7		2493.1	56.2		2493.1	506.6		2493.1	834.9		2493.1	98.3
									2328.9	423.1		2328.9	91.4		2328.9	61.3		2328.9	523.8		2328.9	871.8		2328.9	95		423.1	523.8
									2021.6	392.5		2021.6	85.3		2021.6	59.8		2021.6	446.8		2021.6	722.4		2021.6	92.5		392.5	446.8
									2177.1	405.9		2177.1	82.8		2177.1	66.6		2177.1	507.8		2177.1	807.7		2177.1	96.3		405.9	507.8
									1946.9	389.4		1946.9	89.6		1946.9	66.4
									2141.6	403.6		2141.6	79.9		2141.6	48.8		2141.6	454.6		2141.6	729.8		2141.6	87.3		403.6	454.6
									2143.3	412.7		2143.3	83.4		2143.3	61		2143.3	462.8					2143.3	82		412.7	462.8
									2186.8	407.8		2186.8	85.3		2186.8	57.7		2186.8	525.1		2186.8	847.4		2186.8	92.6		407.8	525.1
									2021.8	416.2		2021.8	80.6		2021.8	56.5		2021.8	480.9		2021.8	777.5		2021.8	87.7		416.2	480.9
									2497.5	440.7		2497.5	91.8		2497.5	68.1
									2135.5	426.1		2135.5	99.2		2135.5	66.4		2135.5	532.3		2135.5	832.8		2135.5	100.4		426.1	532.3
									2210.6	412.6		2210.6	94		2210.6	60		2210.6	515.2		2210.6	837.2		2210.6	87.1		412.6	515.2
									2070.3	435.7		2070.3	89		2070.3	66.4		2070.3	505.8		2070.3	795.6		2070.3	87.2		435.7	505.8
									1931.3	405.9		1931.3	82.6		1931.3	64.9		1931.3	413.2		1931.3	697.2		1931.3	84.5		405.9	413.2
									2078.7	414.2		2078.7	86.8		2078.7	55.6					2078.7	810.8		2078.7	86.7
									2045.9	421.3		2045.9	83.9		2045.9	58.8		2045.9	436.1		2045.9	720.2		2045.9	87.8		421.3	436.1
									2313.8	452.5		2313.8	90.8		2313.8	62		2313.8	514.3		2313.8	875.4					452.5	514.3
									2150.2	436.7		2150.2	89		2150.2	57.8		2150.2	494.9		2150.2	813.3		2150.2	91.5		436.7	494.9
									2713	470.3		2713	94.5		2713	62.6		2713	570.4		2713	919		2713	102.6		470.3	570.4
												2798.9	90.6		2798.9	62.1		2798.9	548.3		2798.9	881		2798.9	103.1
									2322.6	423.8		2322.6	86.7		2322.6	51.1		2322.6	396.4		2322.6	604.3					423.8	396.4
									2026.5	388.2		2026.5	80.7		2026.5	52.1		2026.5	421.1		2026.5	641.1		2026.5	79		388.2	421.1
									2188.9	404.4		2188.9	82.7		2188.9	56.4		2188.9	405.1		2188.9	691.7		2188.9	87.1		404.4	405.1
									1616.2	333.5		1616.2	69.3		1616.2	41		1616.2	245.6		1616.2	397.6		1616.2	66.5		333.5	245.6
									2263.7	464		2263.7	130.6		2263.7	70.7		2263.7	515		2263.7	927.4		2263.7	95.9		464	515
									1725.8	395.2		1725.8	124.7		1725.8	65.5		1725.8	374		1725.8	607.8		1725.8	82.1		395.2	374
									1800.9	429.3		1800.9	135.1		1800.9	72.5		1800.9	420.5		1800.9	690.2		1800.9	85.7		429.3	420.5
									1935	450.9		1935	134.8		1935	67.1		1935	524.9		1935	881		1935	90.6		450.9	524.9
									1826.7	421.1		1826.7	138.6		1826.7	60.8		1826.7	451.3		1826.7	737.1		1826.7	85		421.1	451.3
												1959.8	137.6		1959.8	61.3		1959.8	479.1		1959.8	788.8		1959.8	94.9
												1908.1	127.1		1908.1	53.7		1908.1	456		1908.1	772		1908.1	85
									2194.3	447.7		2194.3	134.7		2194.3	71.4		2194.3	565		2194.3	937.4		2194.3	93.8		447.7	565
									1679	368.5		1679	127.4		1679	57.7		1679	379.8		1679	632.4		1679	86.1		368.5	379.8
																											450.3	465.1
									1633.5	407.1		1633.5	127.7		1633.5	56.3		1633.5	455.6		1633.5	761.7		1633.5	90.4		407.1	455.6
									1906.4	435.6		1906.4	123.6		1906.4	56.3		1906.4	428		1906.4	719.8		1906.4	88		435.6	428
									2138.2	440.9		2138.2	126.3		2138.2	62.6		2138.2	293.2		2138.2	832		2138.2	94.7		440.9	293.2
									1859.4	432.8		1859.4	132.2		1859.4	54.9		1859.4	495.6		1859.4	876.9		1859.4	94		432.8	495.6
									1976.2	404.7		1976.2	138.6		1976.2	55.5		1976.2	460.8		1976.2	807.1		1976.2	96.6		404.7	460.8
									1933.9	446.2		1933.9	136.4		1933.9	58.9		1933.9	509		1933.9	862.9		1933.9	92.3		446.2	509
									2243.2	475.5		2243.2	139.4		2243.2	69.8		2243.2	610.9		2243.2	1047.5		2243.2	99.3		475.5	610.9
									1983.3	434.6		1983.3	132		1983.3	58.6		1983.3	488.6		1983.3	839.5		1983.3	98.1		434.6	488.6
									2231.4	480.8		2231.4	131		2231.4	71.3		2231.4	576.4		2231.4	984.4		2231.4	98.1		480.8	576.4
									2130.1	457.6		2130.1	136.8		2130.1	61.8		2130.1	564.6		2130.1	904		2130.1	94.1		457.6	564.6
									2051	441.9		2051	139.2		2051	67.1		2051	543.4		2051	933.5		2051	97.2		441.9	543.4
									2474.4	467.8		2474.4	138.7		2474.4	70.9		2474.4	556		2474.4	976.1		2474.4	91.5		467.8	556
									1633.4	415.4		1633.4	122.9		1633.4	50.2		1633.4	449		1633.4	779.4		1633.4	91.5		415.4	449
												1989.7	125.6		1989.7	72.3		1989.7	512.8		1989.7	868.7		1989.7	96.5
									2003.8	453.3		2003.8	119.4		2003.8	61.1		2003.8	448.5		2003.8	772.7		2003.8	95.5		453.3	448.5
									2087.8	412		2087.8	126.1		2087.8	68.6		2087.8	500.8		2087.8	809		2087.8	89		412	500.8
															1851.9	70.3		1851.9	429.8		1851.9	741.2		1851.9	89.2
									1756	429		1756	115.2		1756	74.8		1756	418.8		1756	660.5		1756	89		429	418.8
									2026.6	426.4		2026.6	123.9		2026.6	71.2		2026.6	484.1		2026.6	748.5		2026.6	94.2		426.4	484.1
									1996.7	493.2		1996.7	127.5		1996.7	71.4		1996.7	568.4		1996.7	919.6		1996.7	96.8		493.2	568.4
									2434.9	516.5		2434.9	128.7		2434.9	72.6		2434.9	593.4		2434.9	985.7		2434.9	99.9		516.5	593.4
									2287.6	476.2		2287.6	126.6		2287.6	71.2		2287.6	527.3		2287.6	861		2287.6	94.8		476.2	527.3
									1851.9	438.5		1851.9	126.2		1851.9	75.5		1851.9	431.5								438.5	431.5
									2052.7	512.2		2052.7	174.5		2052.7	86.6		2052.7	558.6		2052.7	962.7		2052.7	119.8		512.2	558.6
									1600.1	457.8		1600.1	175.4		1600.1	74.3		1600.1	469.1		1600.1	865.3		1600.1	106.3		457.8	469.1
									1763.4	436.3		1763.4	163.1		1763.4	70.4		1763.4	481.6		1763.4	844.4		1763.4	107.5		436.3	481.6
												1932.6	184.5		1932.6	62.1		1932.6	564.7		1932.6	1045.3		1932.6	126.9
												1825.2	170.1		1825.2	55.7		1825.2	507.4		1825.2	883.7		1825.2	111
									1526.2	364.7		1526.2	148.9		1526.2	54.8		1526.2	398.8		1526.2	679.1		1526.2	96.5		364.7	398.8
												1869.4	166.5		1869.4	66.5		1869.4	461.3		1869.4	853.3		1869.4	111.7
									2172	509.3		2172	175.7		2172	74.3		2172	594.5		2172	1017.7		2172	121.2		509.3	594.5
									2216	506.5		2216	178		2216	62.3		2216	612.1		2216	1032.5		2216	120		506.5	612.1
									2030.4	478.3		2030.4	172.7		2030.4	78.1		2030.4	537.7		2030.4	900.8		2030.4	114.1		478.3	537.7
									2149.2	474.5		2149.2	181.2		2149.2	86.8		2149.2	591.3		2149.2	1006.7		2149.2	120.3		474.5	591.3
									2295.2	467		2295.2	175.2		2295.2	72.4		2295.2	556.1		2295.2	960.2		2295.2	119.7		467	556.1
									2242.2	505.9		2242.2	183.2		2242.2	68.8		2242.2	616.7		2242.2	1047.1		2242.2	132.4		505.9	616.7
									1892.7	448.8		1892.7	166.6		1892.7	56.1		1892.7	470.2		1892.7	804.8		1892.7	108.4		448.8	470.2
									1848.4	514		1848.4	162.5		1848.4	70.7		1848.4	555.7		1848.4	957.7		1848.4	123.4		514	555.7
												2281.6	180.4		2281.6	85.1		2281.6	621.3		2281.6	1093.6		2281.6	123.2
									2293.5	340.4		2293.5	181.9		2293.5	65.2		2293.5	624.6		2293.5	1068.7		2293.5	128.3		340.4	624.6
												2141.2	182.7		2141.2	86.1		2141.2	591.1		2141.2	1015.6		2141.2	124.7
																		2460.4	625.6		2460.4	1056.3		2460.4	125.2
									2194.4	584.9		2194.4	186.2		2194.4	99.7		2194.4	621.4		2194.4	1054.3		2194.4	121.6		584.9	621.4
									1829.1	483.5		1829.1	161.2		1829.1	69.6		1829.1	465.5		1829.1	838.8		1829.1	113.3		483.5	465.5
									1626.1	432.6		1626.1	154.7		1626.1	61.2		1626.1	416.5		1626.1	738.8		1626.1	109.1		432.6	416.5
									1279.9	386.8		1279.9	136.7		1279.9	44.8		1279.9	331.7		1279.9	584.5		1279.9	96.6		386.8	331.7
									1317.1	407.8		1317.1	144.3		1317.1	52.6		1317.1	362.9		1317.1	641.2		1317.1	89.8		407.8	362.9
									1349.7	442.1		1349.7	150.6		1349.7	51.8
									2195.4	509.7		2195.4	179.1		2195.4	70.2		2195.4	609.1		2195.4	1043.4		2195.4	129.2		509.7	609.1
												1962.3	158.6		1962.3	64.7		1962.3	572.1
									2059.4	534.5		2059.4	179.6		2059.4	71.4		2059.4	639		2059.4	1120.3		2059.4	116.1		534.5	639
									2003.2	524.9		2003.2	172.1		2003.2	89		2003.2	612.2		2003.2	1056.4		2003.2	111.7		524.9	612.2
									1631.5	446.2		1631.5	151.6		1631.5	64		1631.5	459.2		1631.5	775		1631.5	109.5		446.2	459.2
									1640.7	468.2		1640.7	172.2		1640.7	62.8		1640.7	468.6		1640.7	860.1		1640.7	112.4		468.2	468.6
									1896.8	490.2		1896.8	186.4		1896.8	76.3		1896.8	586.5		1896.8	1008.4		1896.8	162.2		490.2	586.5
									1969.6	508.1		1969.6	183.2		1969.6	83.5		1969.6	598.8		1969.6	1062.5		1969.6	131.2		508.1	598.8
									1640.9	457.4		1640.9	179.5		1640.9	68.5		1640.9	495.5		1640.9	930.9		1640.9	119.4		457.4	495.5
									1826.3	489.8		1826.3	185.1		1826.3	75.3		1826.3	558.8		1826.3	1014		1826.3	151.3		489.8	558.8
									1756.9	508.4		1756.9	179.6		1756.9	80.2		1756.9	547.8		1756.9	975.5		1756.9	115.8		508.4	547.8
									1612.4	462.9		1612.4	174.3		1612.4	65.1
									1775.2	489.2		1775.2	157.7		1775.2	76.9		1775.2	483.2		1775.2	835.6		1775.2	107.8		489.2	483.2
									1920.1	515.7		1920.1	160.4		1920.1	77.1		1920.1	546.9		1920.1	967.8		1920.1	111.1		515.7	546.9
									2141.5	588.3		2141.5	172.7		2141.5	81.7		2141.5	633.3		2141.5	1105.3		2141.5	114.8		588.3	633.3
									1949	494.8		1949	160.1		1949	60.8		1949	495		1949	845		1949	111.5		494.8	495
									1802.6	456.5					1802.6	60.1		1802.6	437.1		1802.6	734.4		1802.6	103.5		456.5	437.1
									1952.6	513.8		1952.6	157.4		1952.6	79		1952.6	512.5		1952.6	347.5		1952.6	108.7		513.8	512.5
									1705.8	428.8		1705.8	149		1705.8	71.7		1705.8	434.7		1705.8	737.1		1705.8	99.3		428.8	434.7
									2017	480.6		2017	169.6		2017	73.6
												1700	165.3		1700	77.5		1700	480.8
									1815.5	467.3		1815.5	159.3		1815.5	63.9		1815.5	498.8								467.3	498.8
									1653.9	502.3					1653.9	81.6		1653.9	574.4		1653.9	1042.7		1653.9	118.8		502.3	574.4
									1823.2	499		1823.2	180.2		1823.2	73.4		1823.2	340		1823.2	954.1		1823.2	120.1		499	340
									1886.1	505.6		1886.1	174.2		1886.1	78.1		1886.1	570.9		1886.1	1029.3		1886.1	121.7		505.6	570.9
									2281.1	528		2281.1	188.9		2281.1	99.1		2281.1	632.9		2281.1	1106.5		2281.1	125.4		528	632.9
									2066.4	512		2066.4	172.9		2066.4	67.3		2066.4	590.4		2066.4	1052.1		2066.4	117.5		512	590.4
												1334.7	132.7		1334.7	53.9		1334.7	325.9		1334.7	575.2		1334.7	93.8
												1704.1	142		1704.1	64.3		1704.1	428.6		1704.1	740.6		1704.1	105.3
									1610.8	423		1610.8	146.4		1610.8	51.7		1610.8	419.9		1610.8	719.8		1610.8	98.1		423	419.9
									1580.7	408.4		1580.7	148.7		1580.7	63.5		1580.7	415.4		1580.7	699.1		1580.7	104.9		408.4	415.4
									1744.5	468.3		1744.5	163.8		1744.5	74.1		1744.5	491.4		1744.5	889.7		1744.5	106.4		468.3	491.4
									1835.3	416.4		1835.3	110		1835.3	76.2		1835.3	527		1835.3	870.2		1835.3	82.1		416.4	527
									1911.8	419.3		1911.8	116.6		1911.8	82.8		1911.8	527.8		1911.8	858.4		1911.8	97		419.3	527.8
																											467	557.7
												2068.6	118.5		2068.6	78.4
									2520.4	527.6		2520.4	121		2520.4	87		2520.4	719.2		2520.4	1250.8		2520.4	110.1		527.6	719.2
									2013.2	456		2013.2	108.4		2013.2	72.7		2013.2	539.9		2013.2	925.9					456	539.9
												1770.4	97.6		1770.4	56.8
									2068.4	462.5		2068.4	116.3		2068.4	77.8		2068.4	556.7		2068.4	987.5		2068.4	89.6		462.5	556.7
									1582.7	404.5		1582.7	98.8		1582.7	55.8		1582.7	412.9		1582.7	730.1		1582.7	90.3		404.5	412.9
																											411.2	427.4
									1758.2	375.2		1758.2	95.6		1758.2	60.1		1758.2	416.7		1758.2	684.4		1758.2	74.2		375.2	416.7
									1780.8	420.4		1780.8	99.9		1780.8	62.5		1780.8	433.5		1780.8	740.9		1780.8	75.1		420.4	433.5
									2079.3	490.1		2079.3	114.1		2079.3	76.8		2079.3	535								490.1	535
									2223.5	494.8		2223.5	122.1		2223.5	68.4		2223.5	581.7		2223.5	960.9		2223.5	85.4		494.8	581.7
									2214.2	496.5		2214.2	112.3		2214.2	95.7		2214.2	586.8		2214.2	987.9		2214.2	88.7		496.5	586.8
									2059.1	480		2059.1	115		2059.1	71.9		2059.1	488.5		2059.1	972.3		2059.1	83.9		480	488.5
									1825.3	428.1		1825.3	110.4		1825.3	68.7		1825.3	473.2		1825.3	741.8		1825.3	68.8		428.1	473.2
									1803	453.5		1803	112.9		1803	61.6		1803	474.4		1803	838		1803	80.3		453.5	474.4
									1940.5	473		1940.5	105.5		1940.5	58.4		1940.5	495.2		1940.5	858.9		1940.5	79		473	495.2
									2324	501.3		2324	112.2		2324	71.2		2324	603.2		2324	992.3		2324	72		501.3	603.2
									2039.2	474		2039.2	116		2039.2	65.2		2039.2	505.5		2039.2	876.6		2039.2	84.3		474	505.5
									1563.6	399.1		1563.6	98.5		1563.6	65.2		1563.6	448.3		1563.6	703.2		1563.6	77.4		399.1	448.3
									1414.3	330.4		1414.3	94.6		1414.3	54.2		1414.3	338		1414.3	572		1414.3	66.6		330.4	338
									1344.1	358.5		1344.1	100.5		1344.1	50.1		1344.1	339.9		1344.1	567.2		1344.1	64.7		358.5	339.9
									1279.2	371.3		1279.2	100.1		1279.2	51.2		1279.2	333.5		1279.2	576.2		1279.2	61.4		371.3	333.5
												1413.7	98.4		1413.7	53.5		1413.7	347.1		1413.7	580.2		1413.7	62
									1193.8	356.2		1193.8	88		1193.8	45.6		1193.8	299.9		1193.8	500		1193.8	66.4		356.2	299.9
									1469.4	399.5		1469.4	72.7		1469.4	43.6		1469.4	317.6		1469.4	497.8		1469.4	71.9		399.5	317.6
									1761	454.1		1761	110.4		1761	64.3		1761	475		1761	796.3		1761	85.1		454.1	475
									1548.7	413.5		1548.7	109.7		1548.7	63.2		1548.7	427		1548.7	749		1548.7	80.9		413.5	427
									1588.4	418.2		1588.4	100.1		1588.4	59.8		1588.4	358.6		1588.4	590		1588.4	67.1		418.2	358.6
									1126.4	354.2		1126.4	93.2		1126.4	52.9		1126.4	298.5		1126.4	511.5		1126.4	64.3		354.2	298.5
									1013.3	352.4		1013.3	94.8		1013.3	51.9		1013.3	294.4		1013.3	513.9		1013.3	61.6		352.4	294.4
									1398.8	430.9		1398.8	119.4		1398.8	66.9		1398.8	499.1		1398.8	845.6		1398.8	84		430.9	499.1
									1972.7	464.5		1972.7	118.6		1972.7	73		1972.7	532.2		1972.7	878.5		1972.7	82		464.5	532.2
									1742.1	413		1742.1	107.6		1742.1	64.3		1742.1	484.5		1742.1	789.1		1742.1	76.3		413	484.5
									1837.5	445.6		1837.5	119.5		1837.5	75.3		1837.5	525.5		1837.5	826.9		1837.5	79.9		445.6	525.5
									1442.6	386.5		1442.6	97.6		1442.6	65.8		1442.6	282.1		1442.6	649.1		1442.6	80.5		386.5	282.1
									1477	391.8		1477	98.7		1477	47		1477	378.4		1477	648.7		1477	73.6		391.8	378.4
									1730.3	386.4		1730.3	98.4		1730.3	61.8		1730.3	380		1730.3	611.8		1730.3	65.8		386.4	380
									2023	443.4		2023	126.3		2023	63.5		2023	417.1		2023	948.6					443.4	417.1
									1813.2	429.9		1813.2	132.6		1813.2	58.1		1813.2	512.5		1813.2	973		1813.2	95.5		429.9	512.5
									1515.9	393.2		1515.9	93.1		1515.9	58.1		1515.9	375.6		1515.9	705.8		1515.9	72.5		393.2	375.6
									1620.5	410.1		1620.5	94.9		1620.5	57.1		1620.5	391.1		1620.5	713.4		1620.5	73.2		410.1	391.1
									1910.2	484.4		1910.2	111.1		1910.2	72.3		1910.2	499.6		1910.2	829.8		1910.2	70.7		484.4	499.6
									1662.1	438.9		1662.1	110.6		1662.1	74.8		1662.1	510.3		1662.1	891.6		1662.1	82.7		438.9	510.3
												2130.1	115.5		2130.1	67.9		2130.1	586.4		2130.1	1118.7		2130.1	91.1
												1896.8	115.1					1896.8	568.6		1896.8	1115.4		1896.8	97.1
									1442.9	369.2		1442.9	81.9		1442.9	51.1		1442.9	426.2		1442.9	751.2		1442.9	77.5		369.2	426.2
									2023.3	417.4		2023.3	103.3		2023.3	58.9		2023.3	446.1		2023.3	820.1		2023.3	77.5		417.4	446.1
									1316.3	346		1316.3	97		1316.3	54.9		1316.3	301.5		1316.3	547.3		1316.3	66.3		346	301.5
									1700.5	402.1		1700.5	104.2		1700.5	59.9		1700.5	459.5		1700.5	747.4		1700.5	77.2		402.1	459.5
									1614.2	394.2		1614.2	101.7		1614.2	60.6		1614.2	405.3		1614.2	664.7		1614.2	68.3		394.2	405.3
									1501.9	367.6		1501.9	97.5		1501.9	67.5		1501.9	376.9		1501.9	626.6		1501.9	70.2		367.6	376.9
									2591.8	507.3		2591.8	144.9		2591.8	75		2591.8	599.6		2591.8	973.1		2591.8	90.3		507.3	599.6
									1810.8	433.4		1810.8	130.4		1810.8	62.3		1810.8	465.3		1810.8	748.6		1810.8	78.1		433.4	465.3
									1689.4	458		1689.4	123.7		1689.4	63.7		1689.4	457		1689.4	740.6		1689.4	80.1		458	457
									2053.6	456.7		2053.6	137.5		2053.6	71.9		2053.6	485.4		2053.6	827.6		2053.6	90.7		456.7	485.4
									1436.5	373.9		1436.5	115.9		1436.5	51.6		1436.5	348.1		1436.5	516.1		1436.5	85.7		373.9	348.1
									1410.2	404.2		1410.2	137.9		1410.2	71.4		1410.2	439.2		1410.2	618.3		1410.2	90.4		404.2	439.2
									1437	412.8					1437	75.3		1437	463.7		1437	658.3		1437	91		412.8	463.7
												1876.2	130.4		1876.2	56.3
									1878.5	387.3		1878.5	130.6		1878.5	49.7		1878.5	367.1		1878.5	601.7		1878.5	76.8		387.3	367.1
												1615	137.1		1615	68.5		1615	438.3		1615	682.5		1615	79.3
																											422.4	429.5
																											351.5	281.4
									1733	452.3		1733	123.9		1733	54.7		1733	388		1733	647.2		1733	83.2		452.3	388
									1845.2	440.7		1845.2	139.8		1845.2	65.1
									1767.5	415.5		1767.5	145		1767.5	62.7		1767.5	453.2								415.5	453.2
									1984.7	433.2		1984.7	151		1984.7	69		1984.7	485		1984.7	779		1984.7	82		433.2	485
									2085.5	469.6		2085.5	157		2085.5	65.5		2085.5	502.3		2085.5	776.5		2085.5	88.6		469.6	502.3
									1962.3	446.6		1962.3	150.6		1962.3	62.6		1962.3	452.8		1962.3	712.7		1962.3	84		446.6	452.8
									2087.3	450.5		2087.3	143.5		2087.3	59.2		2087.3	439.6		2087.3	700.7		2087.3	86.6		450.5	439.6
									1946.9	451.8		1946.9	145.8		1946.9	73.1		1946.9	537.1		1946.9	862.9		1946.9	89.8		451.8	537.1
									2037.2	455.4		2037.2	138.3		2037.2	59.9		2037.2	470.4		2037.2	776.3		2037.2	82.5		455.4	470.4
									1759.3	478		1759.3	136		1759.3	62
																											497.1	425.2
									1741.7	425.4		1741.7	133.7		1741.7	63.2		1741.7	392.1		1741.7	645.2		1741.7	75.9		425.4	392.1
									2133.4	491.4		2133.4	144.5		2133.4	67.6
									2002.4	433.6		2002.4	136.9		2002.4	62.5		2002.4	381.2		2002.4	648.4		2002.4	76.3		433.6	381.2
									2417.5	465.8		2417.5	149.2		2417.5	72.4		2417.5	519.2		2417.5	801.1		2417.5	88.4		465.8	519.2
									2329.1	494.6		2329.1	151.9		2329.1	70		2329.1	504.8		2329.1	800.8		2329.1	87.1		494.6	504.8
												1860.3	151.3		1860.3	63.9		1860.3	407		1860.3	675.9		1860.3	79
												1658.5	148.3		1658.5	64.9		1658.5	407.7		1658.5	640.8		1658.5	71.5
									1430.5	378.9		1430.5	129.7		1430.5	50.3		1430.5	364.7		1430.5	631.5		1430.5	75.6		378.9	364.7
									1923.5	418.6		1923.5	130.1		1923.5	73.4		1923.5	479.8		1923.5	742		1923.5	100.7		418.6	479.8
									2021.9	401		2021.9	130.6		2021.9	72.1		2021.9	459.2		2021.9	694.9		2021.9	96.6		401	459.2
									2186	451		2186	134.3		2186	72.6		2186	557.6		2186	836.9		2186	102.4		451	557.6
									1829	396.5		1829	121.6		1829	57.5		1829	381		1829	564.1		1829	76.2		396.5	381
									1933.5	435.6		1933.5	125.1		1933.5	63.5		1933.5	472.3		1933.5	746.9		1933.5	91.7		435.6	472.3
									1899.9	427.7		1899.9	129.9		1899.9	52.5
									1939.5	420.9		1939.5	126		1939.5	60.7		1939.5	448.6		1939.5	671.4		1939.5	90.5		420.9	448.6
									1881.6	452.9					1881.6	68.7		1881.6	488.3		1881.6	737		1881.6	87.8		452.9	488.3
									1894.9	440.9		1894.9	118.1		1894.9	61.1		1894.9	444.3		1894.9	705.6		1894.9	91.2		440.9	444.3
									2183	434		2183	127.7		2183	50.9		2183	488.3		2183	703.1		2183	102.4		434	488.3
									1436.1	389.9		1436.1	127.9		1436.1	55.7		1436.1	369.9		1436.1	602.3		1436.1	81.8		389.9	369.9
									1549.3	406.1		1549.3	131.5		1549.3	62.2		1549.3	381.7		1549.3	624.7		1549.3	83.9		406.1	381.7
									1552.2	412.3		1552.2	129.7		1552.2	63.9		1552.2	374		1552.2	604.1		1552.2	80.7		412.3	374
									1749.7	437.9		1749.7	146.1		1749.7	66.7		1749.7	442.4		1749.7	412.9		1749.7	85.1		437.9	442.4
									1333.1	390.3		1333.1	130.8		1333.1	54.3		1333.1	359.7		1333.1	592.1		1333.1	81.5		390.3	359.7
									1571.6	389.5		1571.6	129.5		1571.6	60.7		1571.6	368.7		1571.6	618.4		1571.6	80.4		389.5	368.7
																											397.3	396.6
									1887.9	419.1		1887.9	134.5		1887.9	59.3		1887.9	387.8		1887.9	666.3		1887.9	87.2		419.1	387.8
																											415.6	379.4
									1793.3	430.9		1793.3	145.1		1793.3	56.8		1793.3	455.3		1793.3	741.3		1793.3	83.1		430.9	455.3
									1406	397		1406	127.5		1406	57.7		1406	374.5		1406	619		1406	79.8		397	374.5
									1408.2	392.5		1408.2	132		1408.2	56.8		1408.2	356		1408.2	596.6		1408.2	78.2		392.5	356
									1493.4	386.7		1493.4	130.6		1493.4	61.2		1493.4	359.9		1493.4	624.3		1493.4	81.6		386.7	359.9
									1534.3	412.8		1534.3	134.7		1534.3	64.1		1534.3	387.9		1534.3	639.1		1534.3	88.3		412.8	387.9
									1793.3	430.9		1793.3	145.1		1793.3	60.6		1793.3	455.3		1793.3	741.3		1793.3	83.1		430.9	455.3
									1655.8	426.8		1655.8	145.3		1655.8	60.6		1655.8	464.4		1655.8	374.7		1655.8	86		426.8	464.4
												1973.1	145		1973.1	70.1		1973.1	478.7		1973.1	750.8		1973.1	93.1
									1666.7	424.9		1666.7	140.4		1666.7	65.7		1666.7	430.1		1666.7	416.4		1666.7	86.5		424.9	430.1
									1707.9	414.5		1707.9	132.7		1707.9	54.8		1707.9	378.2		1707.9	598.9		1707.9	82.1		414.5	378.2
									1573.8	431.8		1573.8	137.8		1573.8	66.9		1573.8	446.4		1573.8	719.9		1573.8	82.3		431.8	446.4
									1419	406.4		1419	133.8		1419	63.4		1419	399		1419	638.9		1419	83.7		406.4	399
									1511.6	418		1511.6	141.6		1511.6	58.1		1511.6	389.2		1511.6	664.8		1511.6	78.8		418	389.2
									1692.3	420.2		1692.3	143.2		1692.3	71.2		1692.3	443.6		1692.3	675.3		1692.3	87.1		420.2	443.6
									1729.7	428.3		1729.7	142		1729.7	67.3		1729.7	440.3		1729.7	718.6		1729.7	85.8		428.3	440.3
									1390.8	404.7		1390.8	138.7		1390.8	56.3		1390.8	411.8		1390.8	655.5		1390.8	79.7		404.7	411.8
									1225.5	363.3		1225.5	129		1225.5	50		1225.5	355.4		1225.5	570.8		1225.5	77.1		363.3	355.4
									1375.2	394.4		1375.2	139.4		1375.2	61.7		1375.2	390.3		1375.2	615.6		1375.2	75.8		394.4	390.3
									1425.3	400.9		1425.3	136.4		1425.3	56.9		1425.3	398.5		1425.3	660.4		1425.3	80.4		400.9	398.5
									1473.2	410.7		1473.2	132.9		1473.2	63.3		1473.2	419		1473.2	643.9		1473.2	78		410.7	419
									1382.4	404.9		1382.4	131.7		1382.4	60.7		1382.4	378.1		1382.4	644		1382.4	81.9		404.9	378.1
									1356	398.2		1356	127.6		1356	60.4		1356	398.7		1356	621.3		1356	76.7		398.2	398.7
									1332.3	401.4		1332.3	138.3		1332.3	57.2		1332.3	380.8		1332.3	645		1332.3	76		401.4	380.8
									1385.1	396.2		1385.1	140.3		1385.1	60.5		1385.1	399.2		1385.1	643.3		1385.1	84.8		396.2	399.2
									1315.4	374.2		1315.4	136.3		1315.4	56.6		1315.4	369.4		1315.4	616.2		1315.4	78.2		374.2	369.4
